# Supplementary material for: Synthesis of Small Libraries of Natural Products: Part II: Identification of a New Natural Product from the Essential Oil of Pleurospermum austriacum (L.) Hoffm. (Apiaceae)
Source: MDPI journal article supplement (doi:10.3390/molecules28124574), 2023-06-06
Supplement: s1 [file s1]

Supplementary material

for

**Synthesis of small libraries of natural products. Part II:  
identification of a new natural product from the  
essential oil of *Pleurospermum austriacum* (L.) Hoffm.  
(Apiaceae)**

**Niko S. Radulović<sup>1,\*</sup>, Marko Z. Mladenović<sup>1</sup>, Milan S. Dekić<sup>2</sup>, Fabio Boylan<sup>3,\*</sup>**

<sup>1</sup> Department of Chemistry, Faculty of Sciences and Mathematics, University of Niš,  
Višegradska 33, 18000 Niš, Serbia

<sup>2</sup> Department of Chemical and Technological Sciences, State University of Novi Pazar, Vuka  
Karadžića bb, 36300 Novi Pazar, Serbia

<sup>3</sup> School of Pharmacy and Pharmaceutical Sciences and Trinity Biomedical Sciences Institute,  
Panoz Institute, Trinity College Dublin, Dublin 2, Ireland

\* Correspondence: [fabio.boylan@tcd.ie](mailto:fabio.boylan@tcd.ie); Tel.: +353-1-896-4154 and [nikoradulovic@yahoo.com](mailto:nikoradulovic@yahoo.com);  
Tel.: +381-18-533-015; Fax: +381-18-533-014

**Content:**

**Figure S1.** Mass spectrum of phenyl 2-ethylbutanoate (**1a**)

**Figure S2a.** <sup>1</sup>H NMR spectrum of phenyl 2-ethylbutanoate (**1a**) recorded in CDCl<sub>3</sub>

**Figure S2b.** Spin simulation of the methyl groups at position 4 and 6 (lower) and comparison with the experimental ones (upper) for phenyl 2-ethylbutanoate (**1a**)

**Figure S2c.** Spin simulation of the proton signals for the methylene groups at position 3 and 5 (lower) and comparison with the experimental ones (upper) for phenyl 2-ethylbutanoate (**1a**)

**Figure S2d.** Spin simulation of the proton signal at position 2 (lower) and comparison with the experimental ones (upper) for phenyl 2-ethylbutanoate (**1a**)

**Figure S3.** <sup>13</sup>C NMR spectrum of phenyl 2-ethylbutanoate (**1a**) recorded in CDCl<sub>3</sub>

**Figure S4.** Mass spectrum of phenyl 2,2-dimethylbutanoate (**1b**)

**Figure S5.** <sup>1</sup>H NMR spectrum of phenyl 2,2-dimethylbutanoate (**1b**) recorded in CDCl<sub>3</sub>

**Figure S6.** <sup>13</sup>C NMR spectrum of phenyl 2,2-dimethylbutanoate (**1b**) recorded in CDCl<sub>3</sub>

**Figure S7.** Mass spectrum of phenyl 3,3-dimethylbutanoate (**1c**)

**Figure S8.** <sup>1</sup>H NMR spectrum of phenyl 3,3-dimethylbutanoate (**1c**) recorded in CDCl<sub>3</sub>

**Figure S9.** <sup>13</sup>C NMR spectrum of phenyl 3,3-dimethylbutanoate (**1c**) recorded in CDCl<sub>3</sub>

**Figure S10.** Mass spectrum of phenyl 2,3-dimethylbutanoate (**1d**)

**Figure S11.** <sup>1</sup>H NMR spectrum of phenyl 2,3-dimethylbutanoate (**1d**) recorded in CDCl<sub>3</sub>

**Figure S12.**  $^{13}\text{C}$  NMR spectrum of phenyl 2,3-dimethylbutanoate (**1d**) recorded in  $\text{CDCl}_3$

**Figure S13.** Mass spectrum of phenyl 2-methylpentanoate (**1e**)

**Figure S14.**  $^1\text{H}$  NMR spectrum of phenyl 2-methylpentanoate (**1e**) recorded in  $\text{CDCl}_3$

**Figure S15.**  $^{13}\text{C}$  NMR spectrum of phenyl 2-methylpentanoate (**1e**) recorded in  $\text{CDCl}_3$

**Figure S16.** Mass spectrum of phenyl 3-methylpentanoate (**1f**)

**Figure S17.**  $^1\text{H}$  NMR spectrum of phenyl 3-methylpentanoate (**1f**) recorded in  $\text{CDCl}_3$

**Figure S18.**  $^{13}\text{C}$  NMR spectrum of phenyl 3-methylpentanoate (**1f**) recorded in  $\text{CDCl}_3$

**Figure S19.** Mass spectrum of phenyl 4-methylpentanoate (**1g**)

**Figure S20.**  $^1\text{H}$  NMR spectrum of phenyl 4-methylpentanoate (**1g**) recorded in  $\text{CDCl}_3$

**Figure S21.**  $^{13}\text{C}$  NMR spectrum of phenyl 4-methylpentanoate (**1g**) recorded in  $\text{CDCl}_3$

**Figure S22.** Mass spectrum of phenyl hexanoate (**1h**)

**Figure S23.**  $^1\text{H}$  NMR spectrum of phenyl hexanoate (**1h**) recorded in  $\text{CDCl}_3$

**Figure S24.**  $^{13}\text{C}$  NMR spectrum of phenyl hexanoate (**1h**) recorded in  $\text{CDCl}_3$

**Figure S25.** Mass spectrum of benzyl 2-ethylbutanoate (**2a**)

**Figure S26.**  $^1\text{H}$  NMR spectrum of benzyl 2-ethylbutanoate (**2a**) recorded in  $\text{CDCl}_3$

**Figure S27.**  $^{13}\text{C}$  NMR spectrum of benzyl 2-ethylbutanoate (**2a**) recorded in  $\text{CDCl}_3$

**Figure S28.** Mass spectrum of benzyl 2,2-dimethylbutanoate (**2b**)

**Figure S29.**  $^1\text{H}$  NMR spectrum of benzyl 2,2-dimethylbutanoate (**2b**) recorded in  $\text{CDCl}_3$

**Figure S30.**  $^{13}\text{C}$  NMR spectrum of benzyl 2,2-dimethylbutanoate (**2b**) recorded in  $\text{CDCl}_3$

**Figure S31.** Mass spectrum of benzyl 3,3-dimethylbutanoate (**2c**)

**Figure S32.**  $^1\text{H}$  NMR spectrum of benzyl 3,3-dimethylbutanoate (**2c**) recorded in  $\text{CDCl}_3$

**Figure S33.**  $^{13}\text{C}$  NMR spectrum of benzyl 3,3-dimethylbutanoate (**2c**) recorded in  $\text{CDCl}_3$

**Figure S34.** Mass spectrum of benzyl 2,3-dimethylbutanoate (**2d**)

**Figure S35.**  $^1\text{H}$  NMR spectrum of benzyl 2,3-dimethylbutanoate (**2d**) recorded in  $\text{CDCl}_3$

**Figure S36.**  $^{13}\text{C}$  NMR spectrum of benzyl 2,3-dimethylbutanoate (**2d**) recorded in  $\text{CDCl}_3$

**Figure S37.** Mass spectrum of benzyl 2-methylpentanoate (**2e**)

**Figure S38.**  $^1\text{H}$  NMR spectrum of benzyl 2-methylpentanoate (**2e**) recorded in  $\text{CDCl}_3$

**Figure S39.**  $^{13}\text{C}$  NMR spectrum of benzyl 2-methylpentanoate (**2e**) recorded in  $\text{CDCl}_3$

**Figure S40.** Mass spectrum of benzyl 3-methylpentanoate (**2f**)

**Figure S41.**  $^1\text{H}$  NMR spectrum of benzyl 3-methylpentanoate (**2f**) recorded in  $\text{CDCl}_3$

**Figure S42.**  $^{13}\text{C}$  NMR spectrum of benzyl 3-methylpentanoate (**2f**) recorded in  $\text{CDCl}_3$

**Figure S43.** Mass spectrum of benzyl 4-methylpentanoate (**2g**)

**Figure S44.**  $^1\text{H}$  NMR spectrum of benzyl 4-methylpentanoate (**2g**) recorded in  $\text{CDCl}_3$

**Figure S45.**  $^{13}\text{C}$  NMR spectrum of benzyl 4-methylpentanoate (**2g**) recorded in  $\text{CDCl}_3$

**Figure S46.** Mass spectrum of benzyl hexanoate (**2h**)

**Figure S47.**  $^1\text{H}$  NMR spectrum of benzyl hexanoate (**2h**) recorded in  $\text{CDCl}_3$

**Figure S48.**  $^{13}\text{C}$  NMR spectrum of benzyl hexanoate (**2h**) recorded in  $\text{CDCl}_3$

**Figure S49.** Mass spectrum of phenethyl 2-ethylbutanoate (**3a**)

**Figure S50.**  $^1\text{H}$  NMR spectrum of phenethyl 2-ethylbutanoate (**3a**) recorded in  $\text{CDCl}_3$

**Figure S51.**  $^{13}\text{C}$  NMR spectrum of phenethyl 2-ethylbutanoate (**3a**) recorded in  $\text{CDCl}_3$

**Figure S52.** Mass spectrum of phenethyl 2,2-dimethylbutanoate (**3b**)

**Figure S53.**  $^1\text{H}$  NMR spectrum of phenethyl 2,2-dimethylbutanoate (**3b**) recorded in  $\text{CDCl}_3$

**Figure S54.**  $^{13}\text{C}$  NMR spectrum of phenethyl 2,2-dimethylbutanoate (**3b**) recorded in  $\text{CDCl}_3$

**Figure S55.** Mass spectrum of phenethyl 3,3-dimethylbutanoate (**3c**)

**Figure S56.**  $^1\text{H}$  NMR spectrum of phenethyl 3,3-dimethylbutanoate (**3c**) recorded in  $\text{CDCl}_3$

**Figure S57.**  $^{13}\text{C}$  NMR spectrum of phenethyl 3,3-dimethylbutanoate (**3c**) recorded in  $\text{CDCl}_3$

**Figure S58.** Mass spectrum of phenethyl 2,3-dimethylbutanoate (**3d**)

**Figure S59.**  $^1\text{H}$  NMR spectrum of phenethyl 2,3-dimethylbutanoate (**3d**) recorded in  $\text{CDCl}_3$

**Figure S60.**  $^{13}\text{C}$  NMR spectrum of phenethyl 2,3-dimethylbutanoate (**3d**) recorded in  $\text{CDCl}_3$

**Figure S61.** Mass spectrum of phenethyl 2-methylpentanoate (**3e**)

**Figure S62.**  $^1\text{H}$  NMR spectrum of phenethyl 2-methylpentanoate (**3e**) recorded in  $\text{CDCl}_3$

**Figure S63.**  $^{13}\text{C}$  NMR spectrum of phenethyl 2-methylpentanoate (**3e**) recorded in  $\text{CDCl}_3$

**Figure S64.** Mass spectrum of phenethyl 3-methylpentanoate (**3f**)

**Figure S65.**  $^1\text{H}$  NMR spectrum of phenethyl 3-methylpentanoate (**3f**) recorded in  $\text{CDCl}_3$

**Figure S66.**  $^{13}\text{C}$  NMR spectrum of phenethyl 3-methylpentanoate (**3f**) recorded in  $\text{CDCl}_3$

**Figure S67.** Mass spectrum of phenethyl 4-methylpentanoate (**3g**)

**Figure S68.**  $^1\text{H}$  NMR spectrum of phenethyl 4-methylpentanoate (**3g**) recorded in  $\text{CDCl}_3$

**Figure S69.**  $^{13}\text{C}$  NMR spectrum of phenethyl 4-methylpentanoate (**3g**) recorded in  $\text{CDCl}_3$

**Figure S70.** Mass spectrum of phenethyl hexanoate (**3h**)

**Figure S71.**  $^1\text{H}$  NMR spectrum of phenethyl hexanoate (**3h**) recorded in  $\text{CDCl}_3$

**Figure S72.**  $^{13}\text{C}$  NMR spectrum of phenethyl hexanoate (**3h**) recorded in  $\text{CDCl}_3$

**Figure S73.** Mass spectrum of 3-phenylpropyl 2-ethylbutanoate (**4a**)

**Figure S74.**  $^1\text{H}$  NMR spectrum of 3-phenylpropyl 2-ethylbutanoate (**4a**) recorded in  $\text{CDCl}_3$

**Figure S75.**  $^{13}\text{C}$  NMR spectrum of 3-phenylpropyl 2-ethylbutanoate (**4a**) recorded in  $\text{CDCl}_3$

**Figure S76.** Mass spectrum of 3-phenylpropyl 2,2-dimethylbutanoate (**4b**)

**Figure S77.**  $^1\text{H}$  NMR spectrum of 3-phenylpropyl 2,2-dimethylbutanoate (**4b**) recorded in  $\text{CDCl}_3$

**Figure S78.**  $^{13}\text{C}$  NMR spectrum of 3-phenylpropyl 2,2-dimethylbutanoate (**4b**) recorded in  $\text{CDCl}_3$

**Figure S79.** Mass spectrum of 3-phenylpropyl 3,3-dimethylbutanoate (**4c**)

**Figure S80.**  $^1\text{H}$  NMR spectrum of 3-phenylpropyl 3,3-dimethylbutanoate (**4c**) recorded in  $\text{CDCl}_3$

**Figure S81.**  $^{13}\text{C}$  NMR spectrum of 3-phenylpropyl 3,3-dimethylbutanoate (**4c**) recorded in  $\text{CDCl}_3$

**Figure S82.** Mass spectrum of 3-phenylpropyl 2,3-dimethylbutanoate (**4d**)

**Figure S83.**  $^1\text{H}$  NMR spectrum of 3-phenylpropyl 2,3-dimethylbutanoate (**4d**) recorded in  $\text{CDCl}_3$

**Figure S84.**  $^{13}\text{C}$  NMR spectrum of 3-phenylpropyl 2,3-dimethylbutanoate (**4d**) recorded in  $\text{CDCl}_3$

**Figure S85.** Mass spectrum of 3-phenylpropyl 2-methylpentanoate (**4e**)

**Figure S86a.**  $^1\text{H}$  NMR spectrum of 3-phenylpropyl 2-methylpentanoate (**4e**) recorded in  $\text{CDCl}_3$

**Figure S86b.**  $^1\text{H} - ^1\text{H}$  COSY spectrum of 3-phenylpropyl 2-methylpentanoate (**4e**)

**Figure S86c.** NOESY spectrum of 3-phenylpropyl 2-methylpentanoate (**4e**)

**Figure S87a.**  $^{13}\text{C}$  NMR spectrum of 3-phenylpropyl 2-methylpentanoate (**4e**) recorded in  $\text{CDCl}_3$

**Figure S87b.** DEPT 135 spectrum of 3-phenylpropyl 2-methylpentanoate (**4e**)

**Figure S87c.** Proton-coupled  $^{13}\text{C}$  NMR spectrum of 3-phenylpropyl 2-methylpentanoate (**4e**)

**Figure S87d.** grHSQC spectrum of 3-phenylpropyl 2-methylpentanoate (**4e**)

**Figure S87e.** grHMBC spectrum of 3-phenylpropyl 2-methylpentanoate (**4e**)

**Figure S88.** Mass spectrum of 3-phenylpropyl 3-methylpentanoate (**4f**)

**Figure S89.**  $^1\text{H}$  NMR spectrum of 3-phenylpropyl 3-methylpentanoate (**4f**) recorded in  $\text{CDCl}_3$

**Figure S90.**  $^{13}\text{C}$  NMR spectrum of 3-phenylpropyl 3-methylpentanoate (**4f**) recorded in  $\text{CDCl}_3$

**Figure S91.** Mass spectrum of 3-phenylpropyl 4-methylpentanoate (**4g**)

**Figure S92.**  $^1\text{H}$  NMR spectrum of 3-phenylpropyl 4-methylpentanoate (**4g**) recorded in  $\text{CDCl}_3$

**Figure S93.**  $^{13}\text{C}$  NMR spectrum of 3-phenylpropyl 4-methylpentanoate (**4g**) recorded in  $\text{CDCl}_3$

**Figure S94.** Mass spectrum of 3-phenylpropyl hexanoate (**4h**)

**Figure S95.**  $^1\text{H}$  NMR spectrum of 3-phenylpropyl hexanoate (**4h**) recorded in  $\text{CDCl}_3$

**Figure S96.**  $^{13}\text{C}$  NMR spectrum of 3-phenylpropyl hexanoate (**4h**) recorded in  $\text{CDCl}_3$

**Figure S97.** Mass spectrum of 4-phenylbutyl 2-ethylbutanoate (**5a**)

**Figure S98.**  $^1\text{H}$  NMR spectrum of 4-phenylbutyl 2-ethylbutanoate (**5a**) recorded in  $\text{CDCl}_3$

**Figure S99.**  $^{13}\text{C}$  NMR spectrum of 4-phenylbutyl 2-ethylbutanoate (**5a**) recorded in  $\text{CDCl}_3$

**Figure S100.** Mass spectrum of 4-phenylbutyl 2,2-dimethylbutanoate (**5b**)

**Figure S101.**  $^1\text{H}$  NMR spectrum of 4-phenylbutyl 2,2-dimethylbutanoate (**5b**) recorded in  $\text{CDCl}_3$

**Figure S102.**  $^{13}\text{C}$  NMR spectrum of 4-phenylbutyl 2,2-dimethylbutanoate (**5b**) recorded in  $\text{CDCl}_3$

**Figure S103.** Mass spectrum of 4-phenylbutyl 3,3-dimethylbutanoate (**5c**)

**Figure S104.**  $^1\text{H}$  NMR spectrum of 4-phenylbutyl 3,3-dimethylbutanoate (**5c**) recorded in  $\text{CDCl}_3$

**Figure S105.**  $^{13}\text{C}$  NMR spectrum of 4-phenylbutyl 3,3-dimethylbutanoate (**5c**) recorded in  $\text{CDCl}_3$

**Figure S106.** Mass spectrum of 4-phenylbutyl 2,3-dimethylbutanoate (**5d**)

**Figure S107.**  $^1\text{H}$  NMR spectrum of 4-phenylbutyl 2,3-dimethylbutanoate (**5d**) recorded in  $\text{CDCl}_3$

**Figure S108.**  $^{13}\text{C}$  NMR spectrum of 4-phenylbutyl 2,3-dimethylbutanoate (**5d**) recorded in  $\text{CDCl}_3$

**Figure S109.** Mass spectrum of 4-phenylbutyl 2-methylpentanoate (**5e**)

**Figure S110.**  $^1\text{H}$  NMR spectrum of 4-phenylbutyl 2-methylpentanoate (**5e**) recorded in  $\text{CDCl}_3$

**Figure S111.**  $^{13}\text{C}$  NMR spectrum of 4-phenylbutyl 2-methylpentanoate (**5e**) recorded in  $\text{CDCl}_3$

**Figure S112.** Mass spectrum of 4-phenylbutyl 3-methylpentanoate (**5f**)

**Figure S113.**  $^1\text{H}$  NMR spectrum of 4-phenylbutyl 3-methylpentanoate (**5f**) recorded in  $\text{CDCl}_3$

**Figure S114.**  $^{13}\text{C}$  NMR spectrum of 4-phenylbutyl 3-methylpentanoate (**5f**) recorded in  $\text{CDCl}_3$

**Figure S115.** Mass spectrum of 4-phenylbutyl 4-methylpentanoate (**5g**)

**Figure S116.**  $^1\text{H}$  NMR spectrum of 4-phenylbutyl 4-methylpentanoate (**5g**) recorded in  $\text{CDCl}_3$

**Figure S117.**  $^{13}\text{C}$  NMR spectrum of 4-phenylbutyl 4-methylpentanoate (**5g**) recorded in  $\text{CDCl}_3$

**Figure S118.** Mass spectrum of 4-phenylbutyl hexanoate (**5h**)

**Figure S119.**  $^1\text{H}$  NMR spectrum of 4-phenylbutyl hexanoate (**5h**) recorded in  $\text{CDCl}_3$

**Figure S120.**  $^{13}\text{C}$  NMR spectrum of 4-phenylbutyl hexanoate (**5h**) recorded in  $\text{CDCl}_3$

**Figure S121.** Mass spectrum of 5-phenylpentyl 2-ethylbutanoate (**6a**)

**Figure S122.**  $^1\text{H}$  NMR spectrum of 5-phenylpentyl 2-ethylbutanoate (**6a**) recorded in  $\text{CDCl}_3$

**Figure S123.**  $^{13}\text{C}$  NMR spectrum of 5-phenylpentyl 2-ethylbutanoate (**6a**) recorded in  $\text{CDCl}_3$

**Figure S124.** Mass spectrum of 5-phenylpentyl 2,2-dimethylbutanoate (**6b**)

**Figure S125.**  $^1\text{H}$  NMR spectrum of 5-phenylpentyl 2,2-dimethylbutanoate (**6b**) recorded in  $\text{CDCl}_3$

**Figure S126.**  $^{13}\text{C}$  NMR spectrum of 5-phenylpentyl 2,2-dimethylbutanoate (**6b**) recorded in  $\text{CDCl}_3$

**Figure S127.** Mass spectrum of 5-phenylpentyl 3,3-dimethylbutanoate (**6c**)

**Figure S128.**  $^1\text{H}$  NMR spectrum of 5-phenylpentyl 3,3-dimethylbutanoate (**6c**) recorded in  $\text{CDCl}_3$

**Figure S129.**  $^{13}\text{C}$  NMR spectrum of 5-phenylpentyl 3,3-dimethylbutanoate (**6c**) recorded in  $\text{CDCl}_3$

**Figure S130.** Mass spectrum of 5-phenylpentyl 2,3-dimethylbutanoate (**6d**)

**Figure S131.**  $^1\text{H}$  NMR spectrum of 5-phenylpentyl 2,3-dimethylbutanoate (**6d**) recorded in  $\text{CDCl}_3$

**Figure S132.**  $^{13}\text{C}$  NMR spectrum of 5-phenylpentyl 2,3-dimethylbutanoate (**6d**) recorded in  $\text{CDCl}_3$

**Figure S133.** Mass spectrum of 5-phenylpentyl 2-methylpentanoate (**6e**)

**Figure S134.**  $^1\text{H}$  NMR spectrum of 5-phenylpentyl 2-methylpentanoate (**6e**) recorded in  $\text{CDCl}_3$

**Figure S135.**  $^{13}\text{C}$  NMR spectrum of 5-phenylpentyl 2-methylpentanoate (**6e**) recorded in  $\text{CDCl}_3$

**Figure S136.** Mass spectrum of 5-phenylpentyl 3-methylpentanoate (**6f**)

**Figure S137.**  $^1\text{H}$  NMR spectrum of 5-phenylpentyl 3-methylpentanoate (**6f**) recorded in  $\text{CDCl}_3$

**Figure S138.**  $^{13}\text{C}$  NMR spectrum of 5-phenylpentyl 3-methylpentanoate (**6f**) recorded in  $\text{CDCl}_3$

**Figure S139.** Mass spectrum of 5-phenylpentyl 4-methylpentanoate (**6g**)

**Figure S140.**  $^1\text{H}$  NMR spectrum of 5-phenylpentyl 4-methylpentanoate (**6g**) recorded in  $\text{CDCl}_3$

**Figure S141.**  $^{13}\text{C}$  NMR spectrum of 5-phenylpentyl 4-methylpentanoate (**6g**) recorded in  $\text{CDCl}_3$

**Figure S142.** Mass spectrum of 5-phenylpentyl hexanoate (**6h**)

**Figure S143.**  $^1\text{H}$  NMR spectrum of 5-phenylpentyl hexanoate (**6h**) recorded in  $\text{CDCl}_3$

**Figure S144.**  $^{13}\text{C}$  NMR spectrum of 5-phenylpentyl hexanoate (**6h**) recorded in  $\text{CDCl}_3$

**Figure S145.** Typical total ion current (TIC) chromatogram of a mixture of synthesized (**A**) 3-methylpentanoates and (**B**) 4-methylpentanoates

**Figure S146.** The dependence of RI values of the esters of the same acid (2-ethylbutanoic acid) and phenol (**1**), benzyl alcohol (**2**), phenethyl alcohol (**3**), 3-phenylpropanol (**4**), 4-phenylbutanol (**5**), and 5-phenylpentanol (**6**)

**Figure S147.** The dependence of RI values of the esters of the same acid (2,2-dimethylbutanoic acid) and phenol (**1**), benzyl alcohol (**2**), phenethyl alcohol (**3**), 3-phenylpropanol (**4**), 4-phenylbutanol (**5**), and 5-phenylpentanol (**6**)

**Figure S148.** The dependence of RI values of the esters of the same acid (3,3-dimethylbutanoic acid) and phenol (**1**), benzyl alcohol (**2**), phenethyl alcohol (**3**), 3-phenylpropanol (**4**), 4-phenylbutanol (**5**), and 5-phenylpentanol (**6**)

**Figure S149.** The dependence of RI values of the esters of the same acid (2,3-dimethylbutanoic acid) and phenol (**1**), benzyl alcohol (**2**), phenethyl alcohol (**3**), 3-phenylpropanol (**4**), 4-phenylbutanol (**5**), and 5-phenylpentanol (**6**)

**Figure S150.** The dependence of RI values of the esters of the same acid (2-methylpentanoic acid) and phenol (**1**), benzyl alcohol (**2**), phenethyl alcohol (**3**), 3-phenylpropanol (**4**), 4-phenylbutanol (**5**), and 5-phenylpentanol (**6**)

**Figure S151.** The dependence of RI values of the esters of the same acid (3-methylpentanoic acid) and phenol (**1**), benzyl alcohol (**2**), phenethyl alcohol (**3**), 3-phenylpropanol (**4**), 4-phenylbutanol (**5**), and 5-phenylpentanol (**6**)

**Figure S152.** The dependence of RI values of the esters of the same acid (4-methylpentanoic acid) and phenol (**1**), benzyl alcohol (**2**), phenethyl alcohol (**3**), 3-phenylpropanol (**4**), 4-phenylbutanol (**5**), and 5-phenylpentanol (**6**)

**Figure S153.** The dependence of RI values of the esters of the same acid (hexanoic acid) and phenol (1), benzyl alcohol (2), phenethyl alcohol (3), 3-phenylpropanol (4), 4-phenylbutanol (5), and 5-phenylpentanol (6)

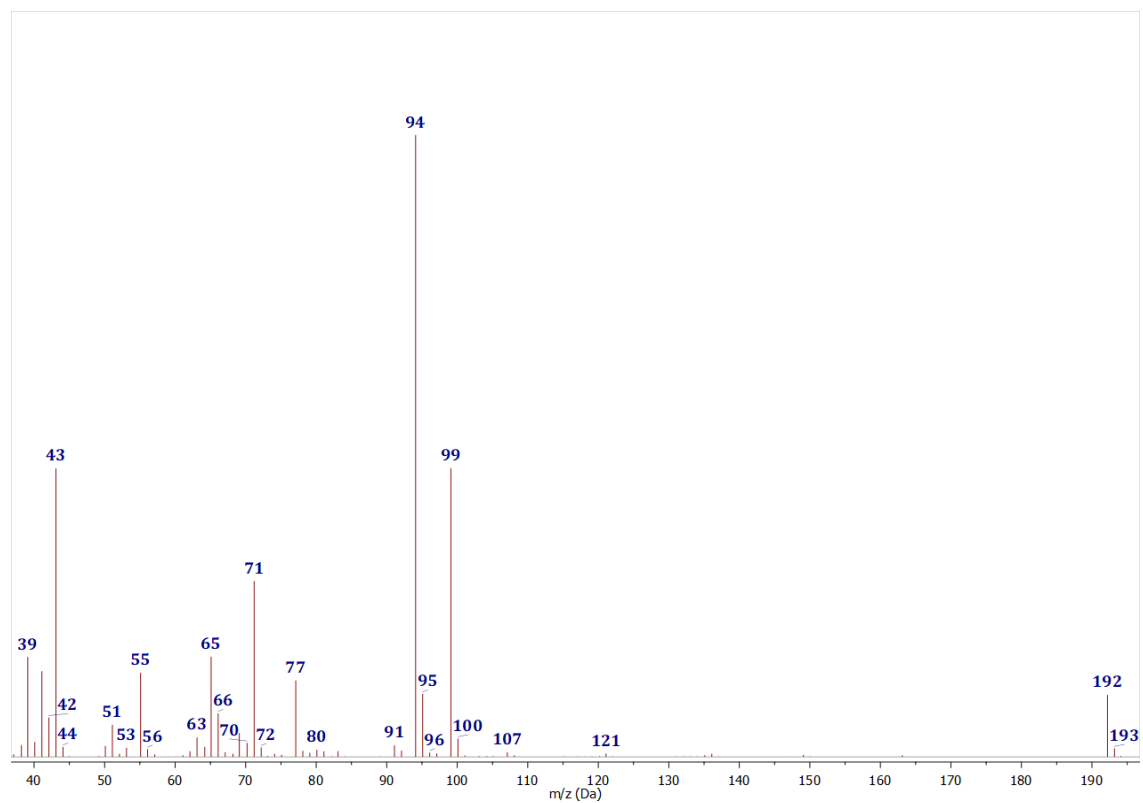

**Figure S1.** Mass spectrum of phenyl 2-ethylbutanoate (**1a**)

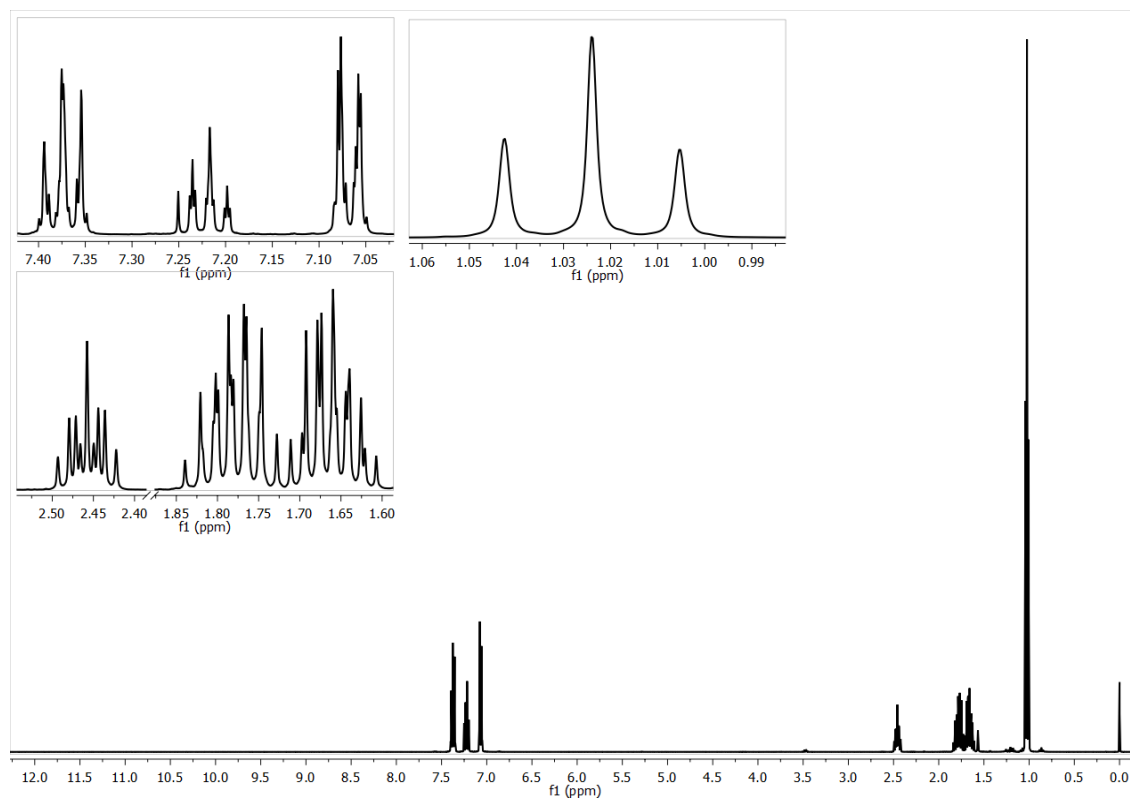

**Figure S2a.**  $^1\text{H}$  NMR spectrum of phenyl 2-ethylbutanoate (**1a**) recorded in  $\text{CDCl}_3$

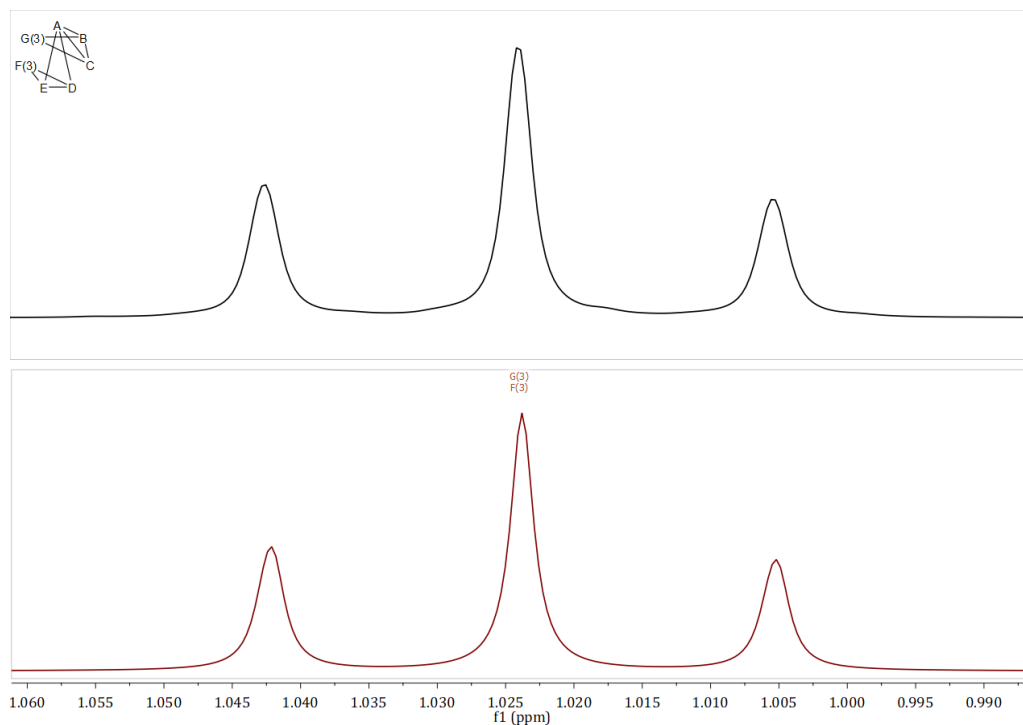

**Figure S2b.** Spin simulation of the methyl groups at position 4 and 6 (lower) and comparison with the experimental ones (upper) for phenyl 2-ethylbutanoate (**1a**)

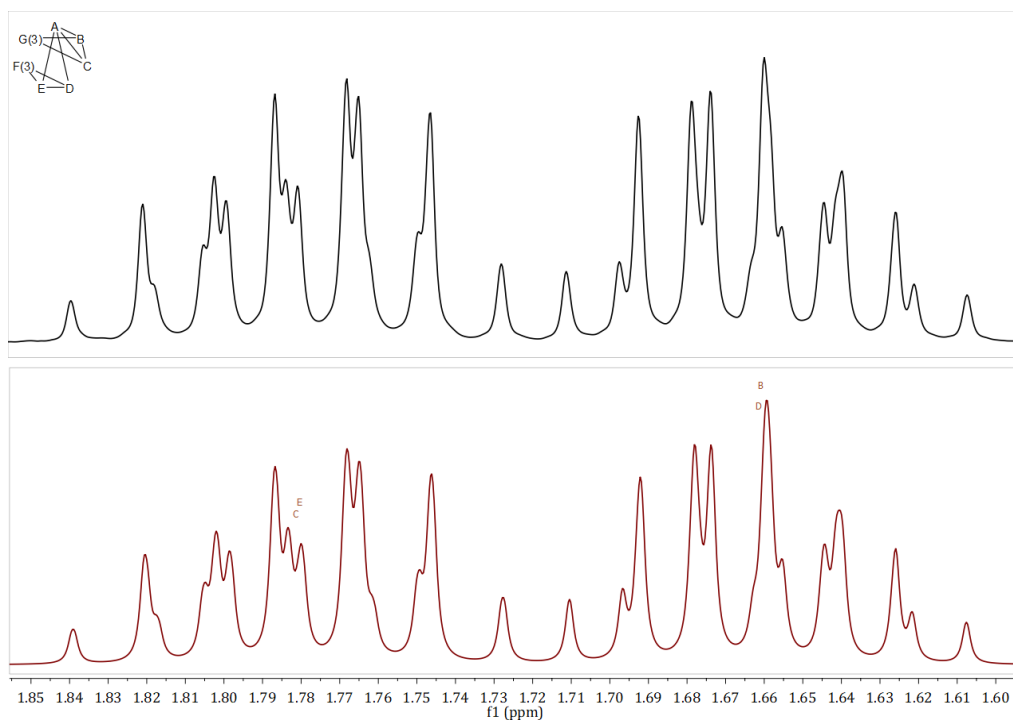

**Figure S2c.** Spin simulation of the proton signals for the methylene groups at position 3 and 5 (lower) and comparison with the experimental ones (upper) for phenyl 2-ethylbutanoate (**1a**)



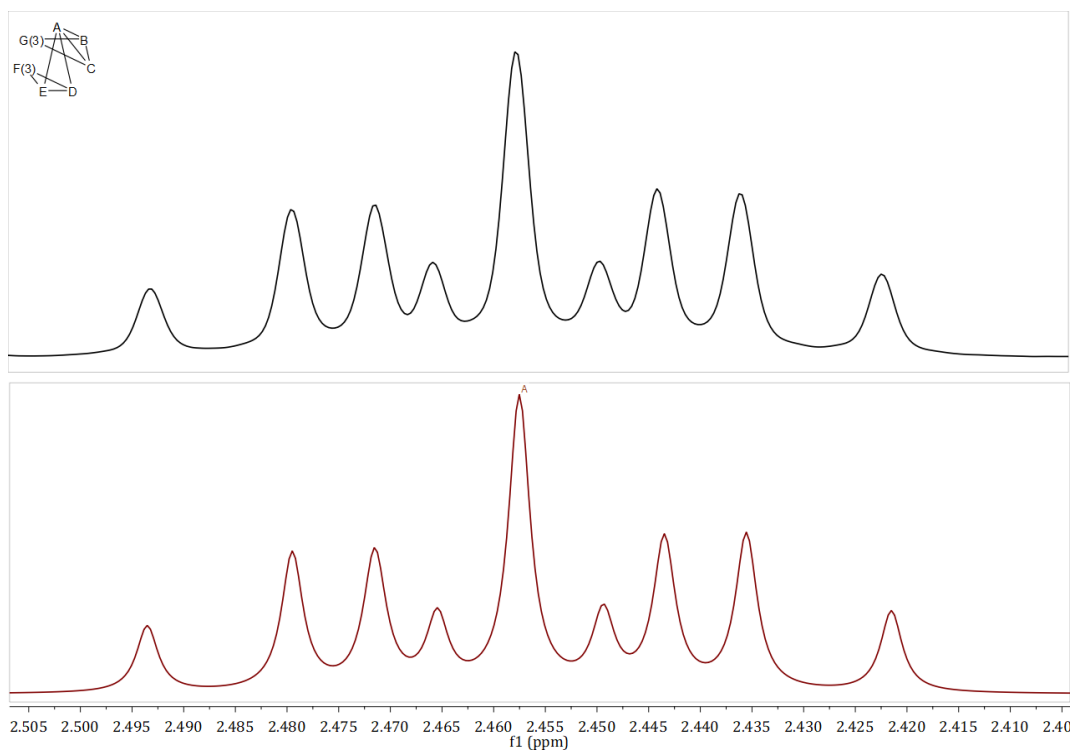

**Figure S2d.** Spin simulation of the proton signal at position 2 (lower) and comparison with the experimental ones (upper) for phenyl 2-ethylbutanoate (**1a**)

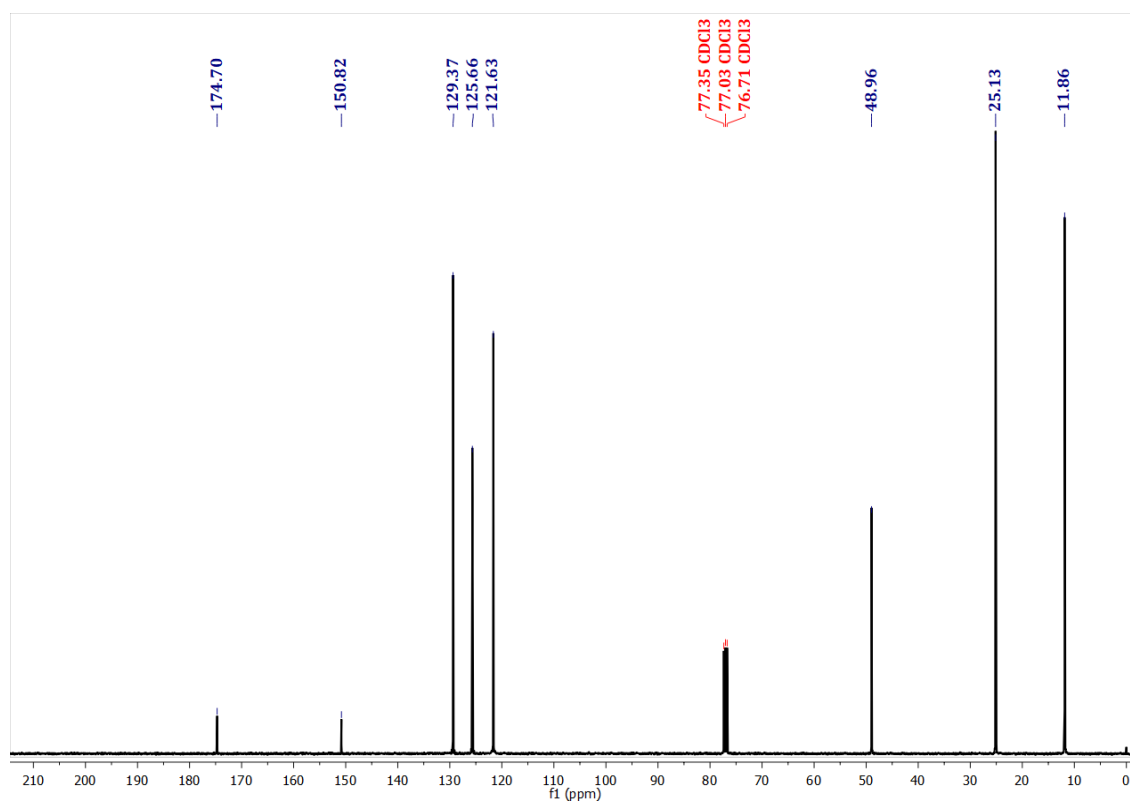

**Figure S3.**  $^{13}\text{C}$  NMR spectrum of phenyl 2-ethylbutanoate (**1a**) recorded in  $\text{CDCl}_3$

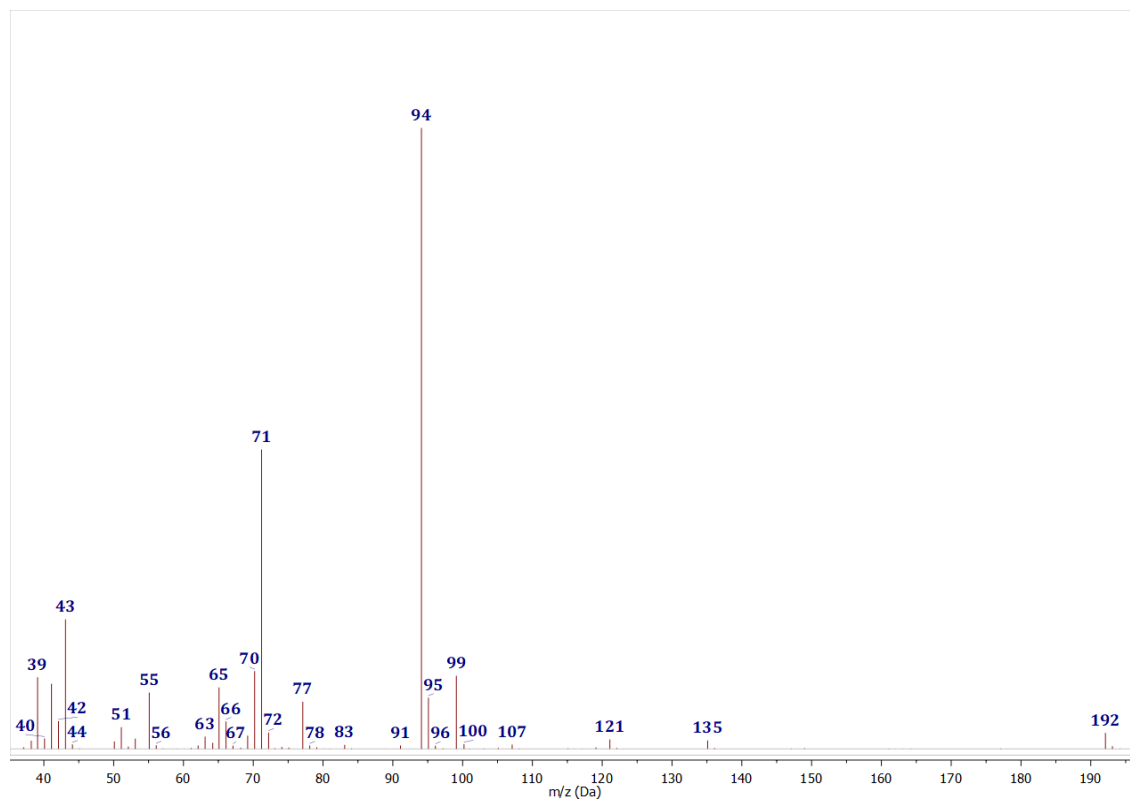

**Figure S4.** Mass spectrum of phenyl 2,2-dimethylbutanoate (**1b**)

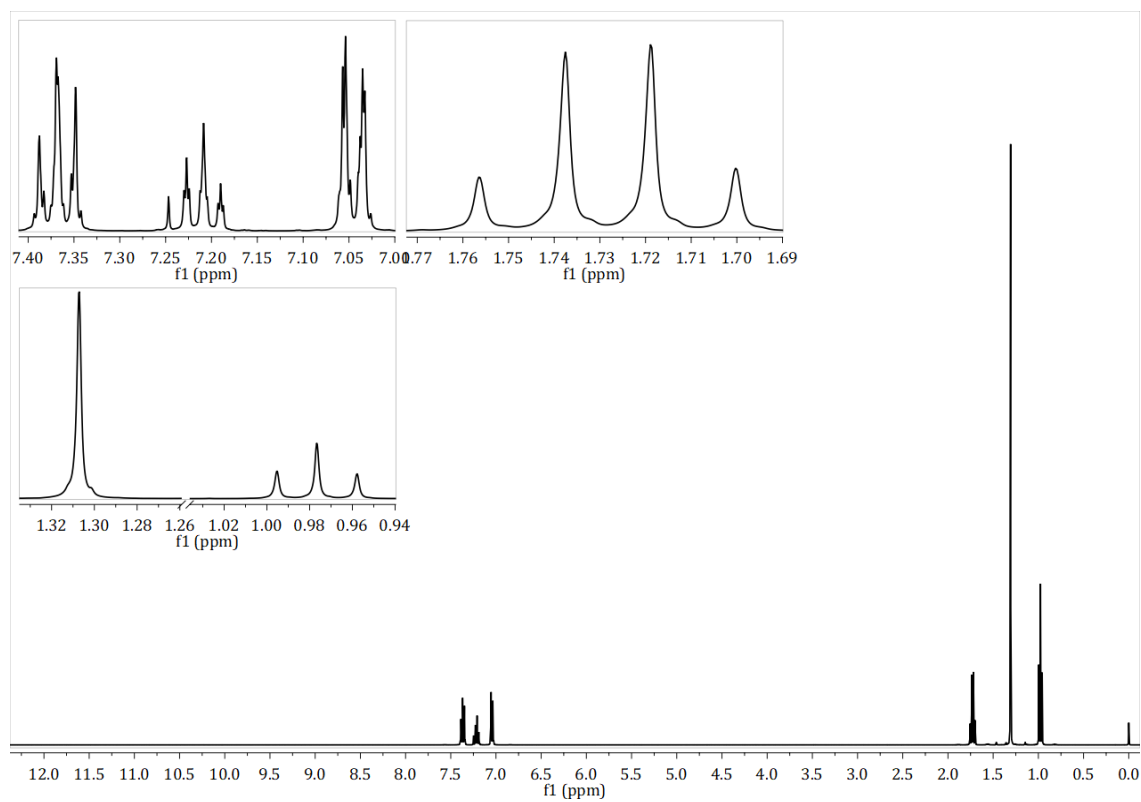

**Figure S5.**  $^1\text{H}$  NMR spectrum of phenyl 2,2-dimethylbutanoate (**1b**) recorded in  $\text{CDCl}_3$

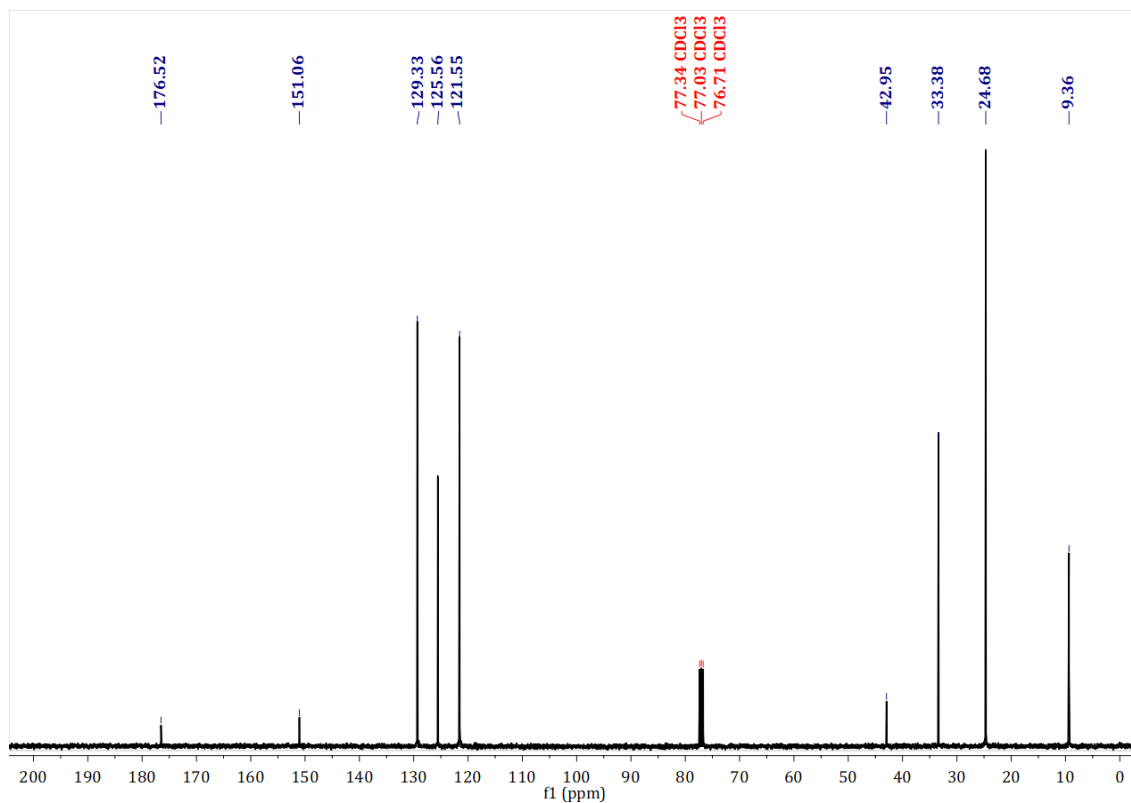

**Figure S6.** <sup>13</sup>C NMR spectrum of phenyl 2,2-dimethylbutanoate (**1b**) recorded in CDCl<sub>3</sub>

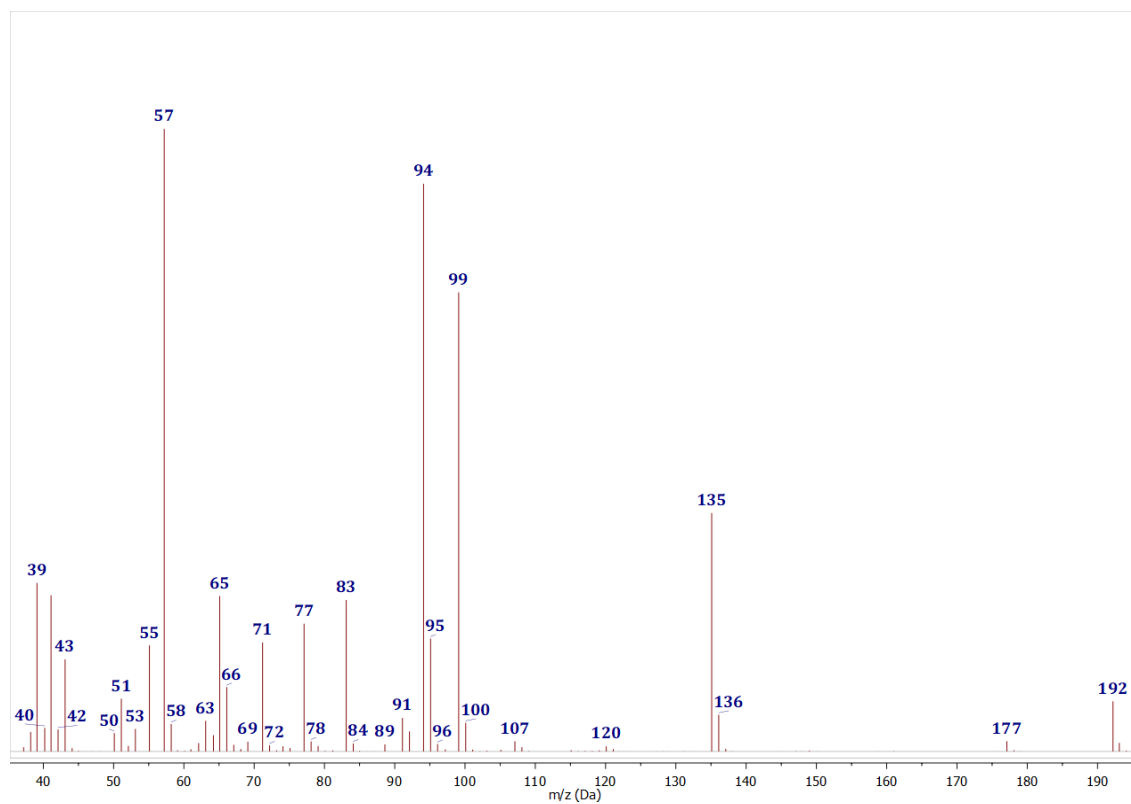

**Figure S7.** Mass spectrum of phenyl 3,3-dimethylbutanoate (**1c**)

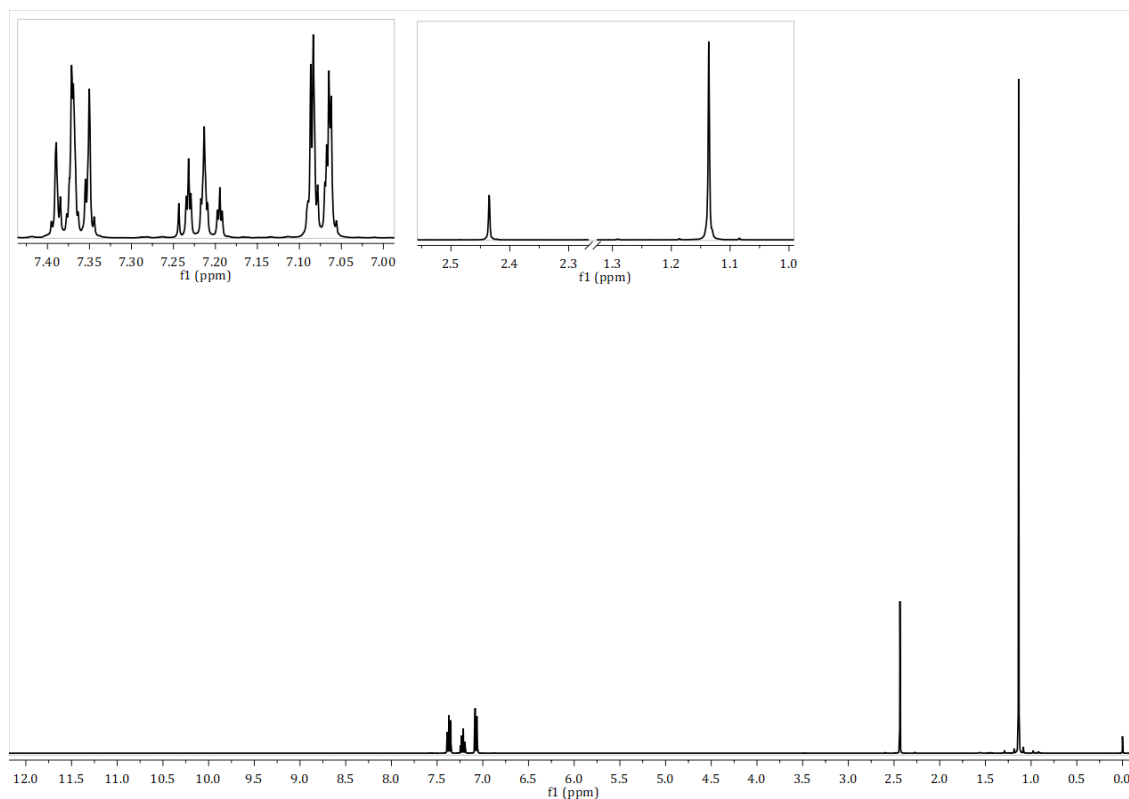

**Figure S8.** <sup>1</sup>H NMR spectrum of phenyl 3,3-dimethylbutanoate (**1c**) recorded in CDCl<sub>3</sub>

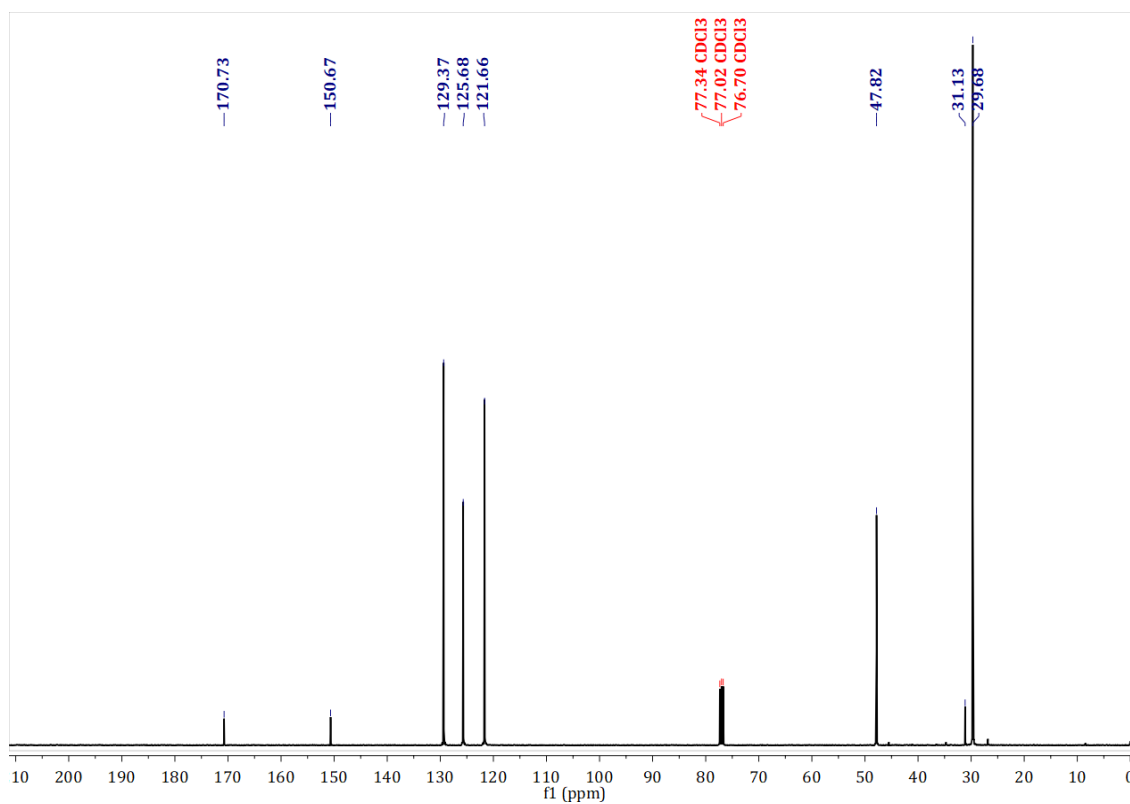

**Figure S9.** <sup>13</sup>C NMR spectrum of phenyl 3,3-dimethylbutanoate (**1c**) recorded in CDCl<sub>3</sub>

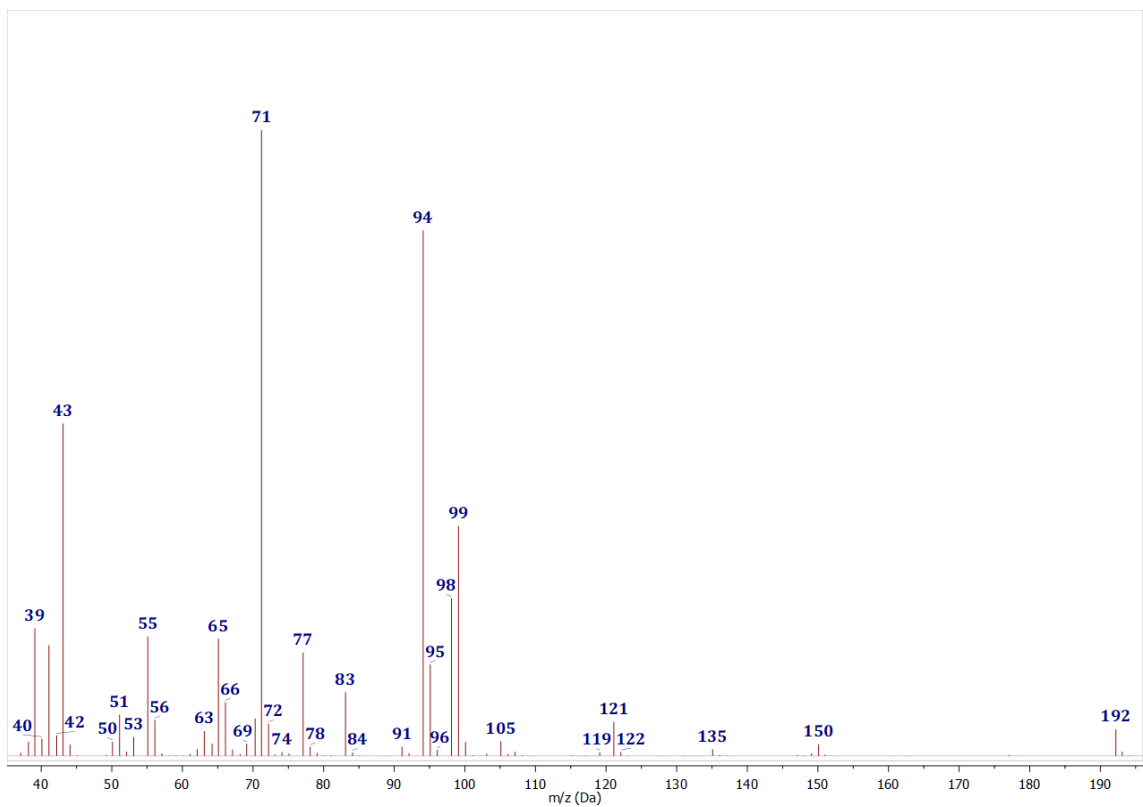

**Figure S10.** Mass spectrum of phenyl 2,3-dimethylbutanoate (**1d**)

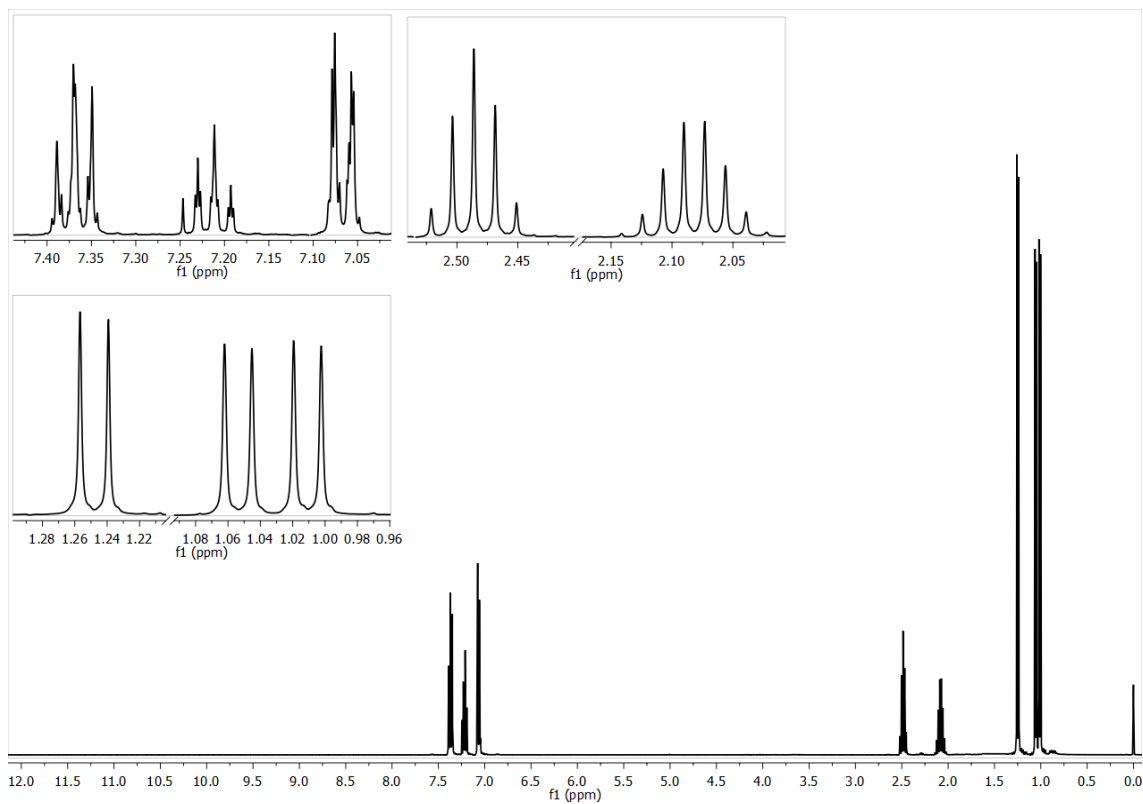

**Figure S11.**  $^1\text{H}$  NMR spectrum of phenyl 2,3-dimethylbutanoate (**1d**) recorded in  $\text{CDCl}_3$

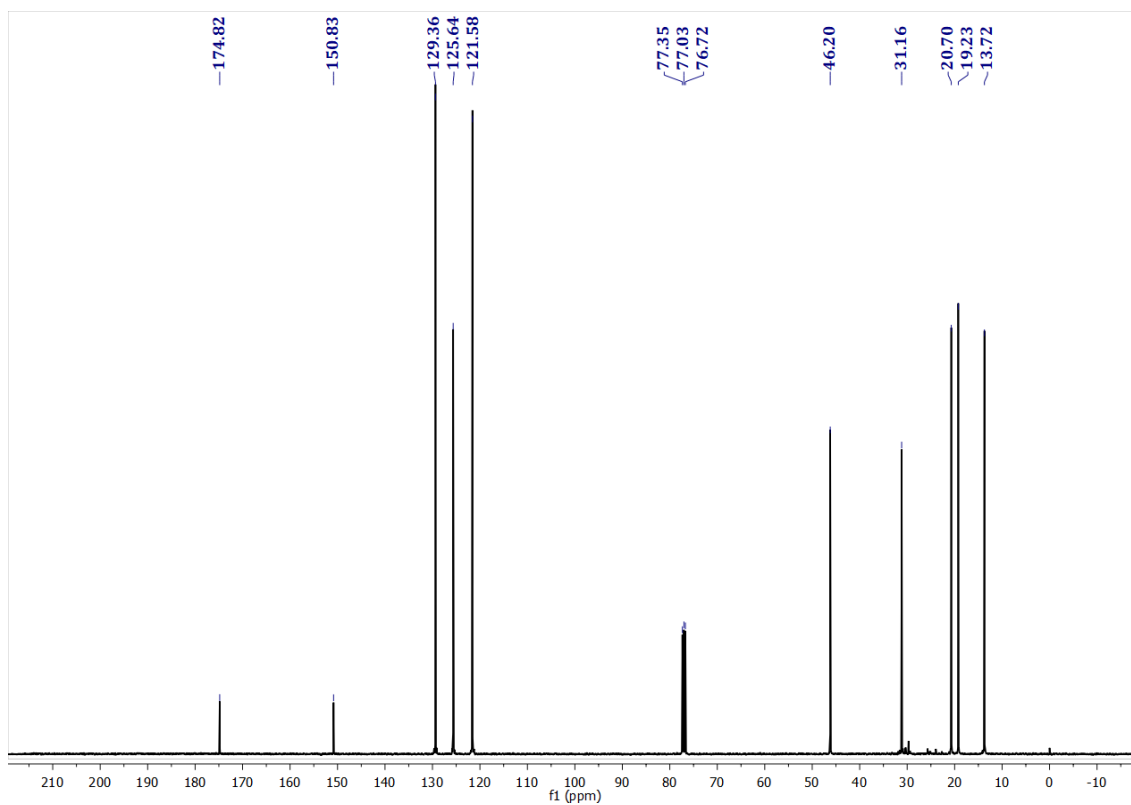

**Figure S12.** <sup>13</sup>C NMR spectrum of phenyl 2,3-dimethylbutanoate (**1d**) recorded in CDCl<sub>3</sub>

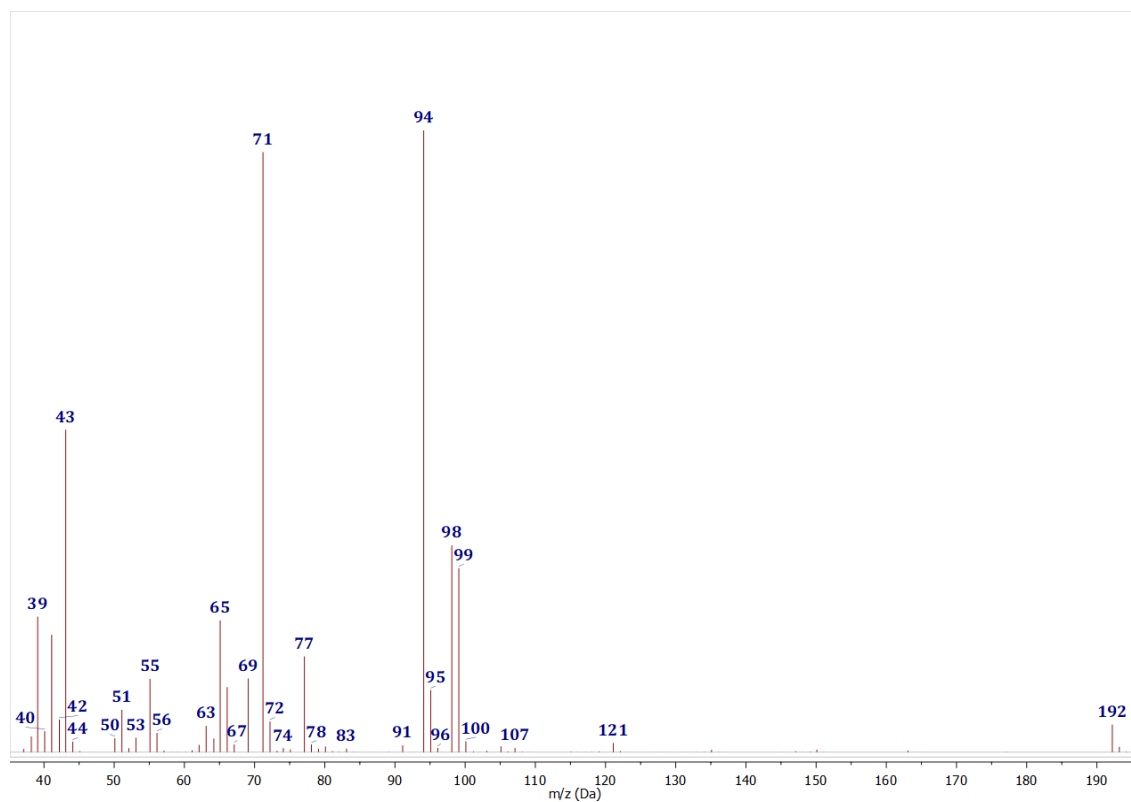

**Figure S13.** Mass spectrum of phenyl 2-methylpentanoate (**1e**)

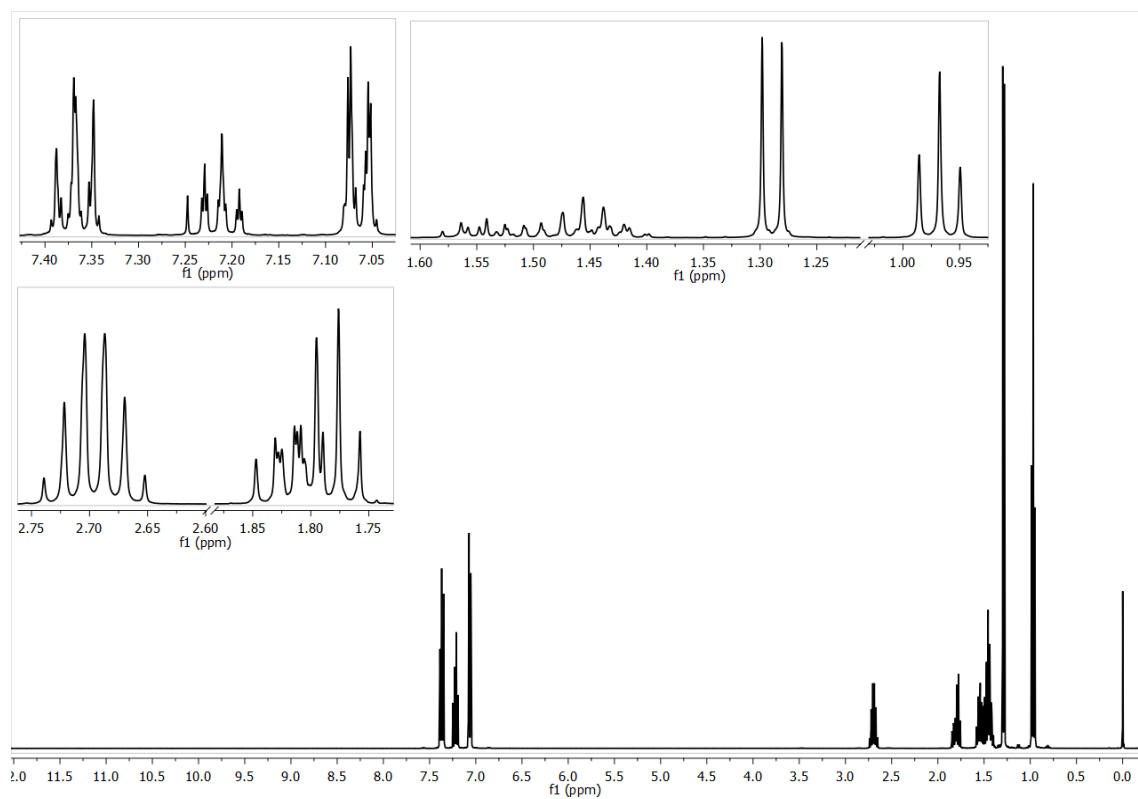

**Figure S14.** <sup>1</sup>H NMR spectrum of phenyl 2-methylpentanoate (**1e**) recorded in CDCl<sub>3</sub>

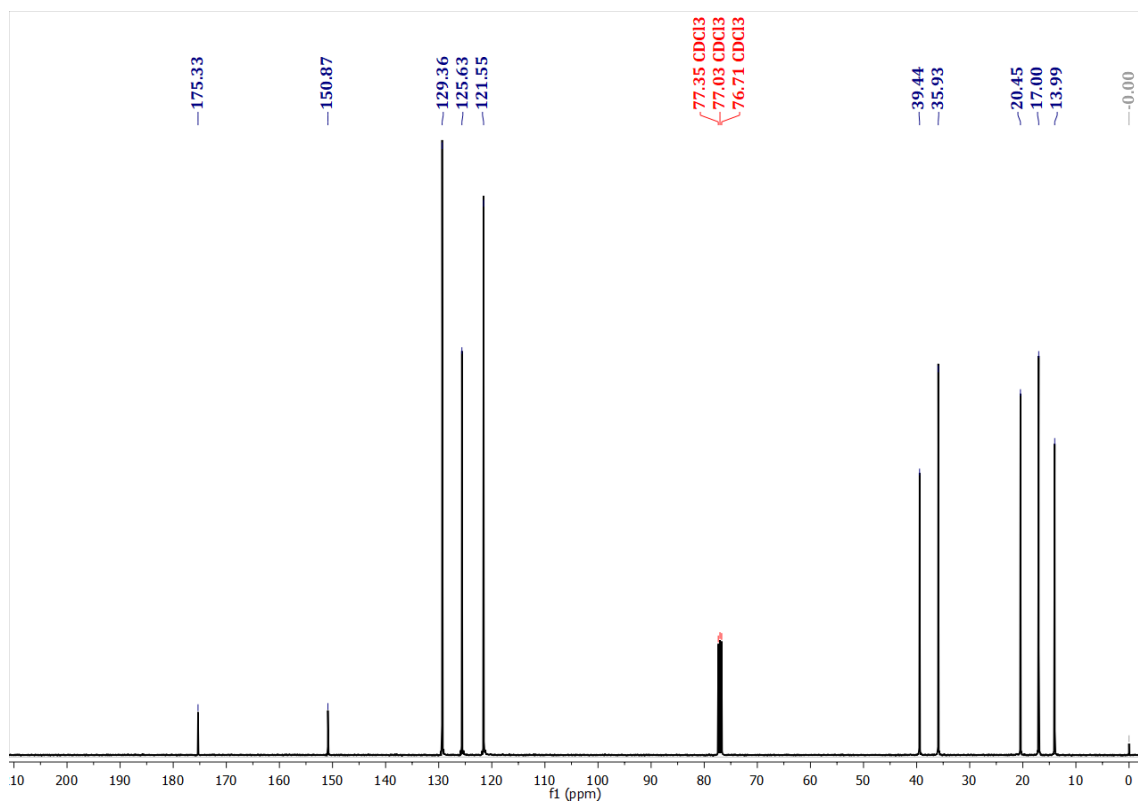

**Figure S15.** <sup>13</sup>C NMR spectrum of phenyl 2-methylpentanoate (**1e**) recorded in CDCl<sub>3</sub>

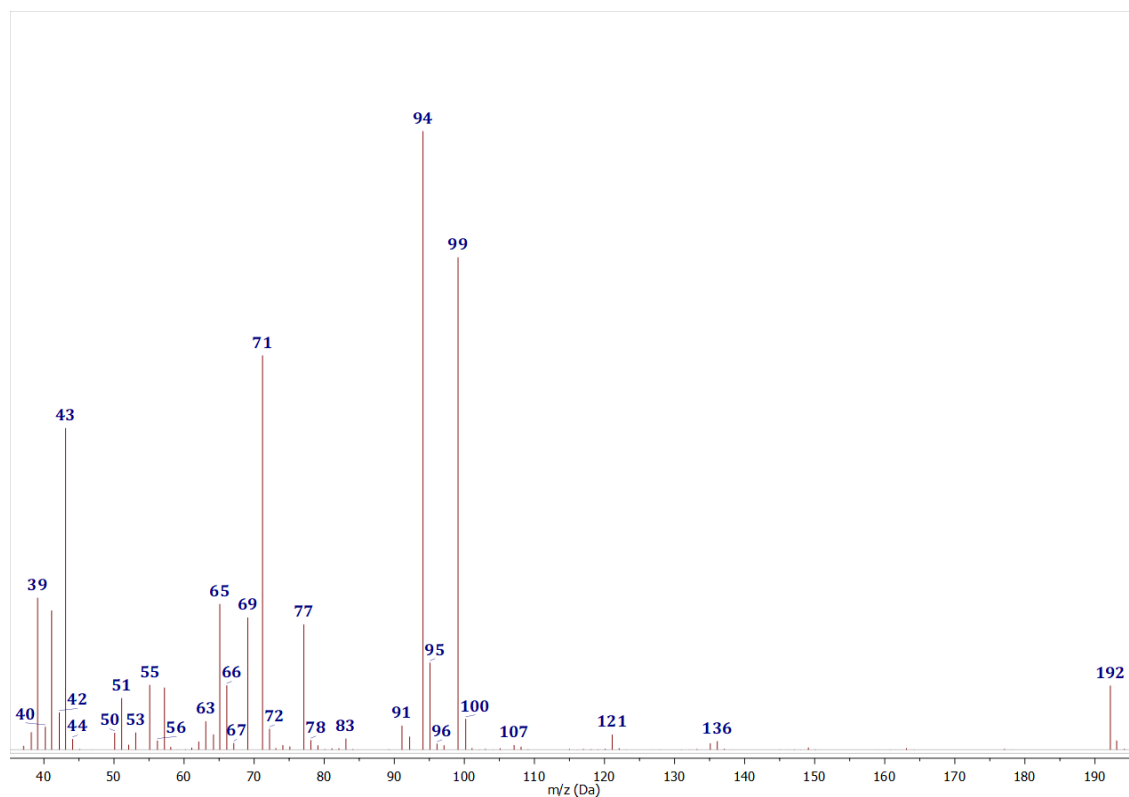

**Figure S16.** Mass spectrum of phenyl 3-methylpentanoate (**1f**)

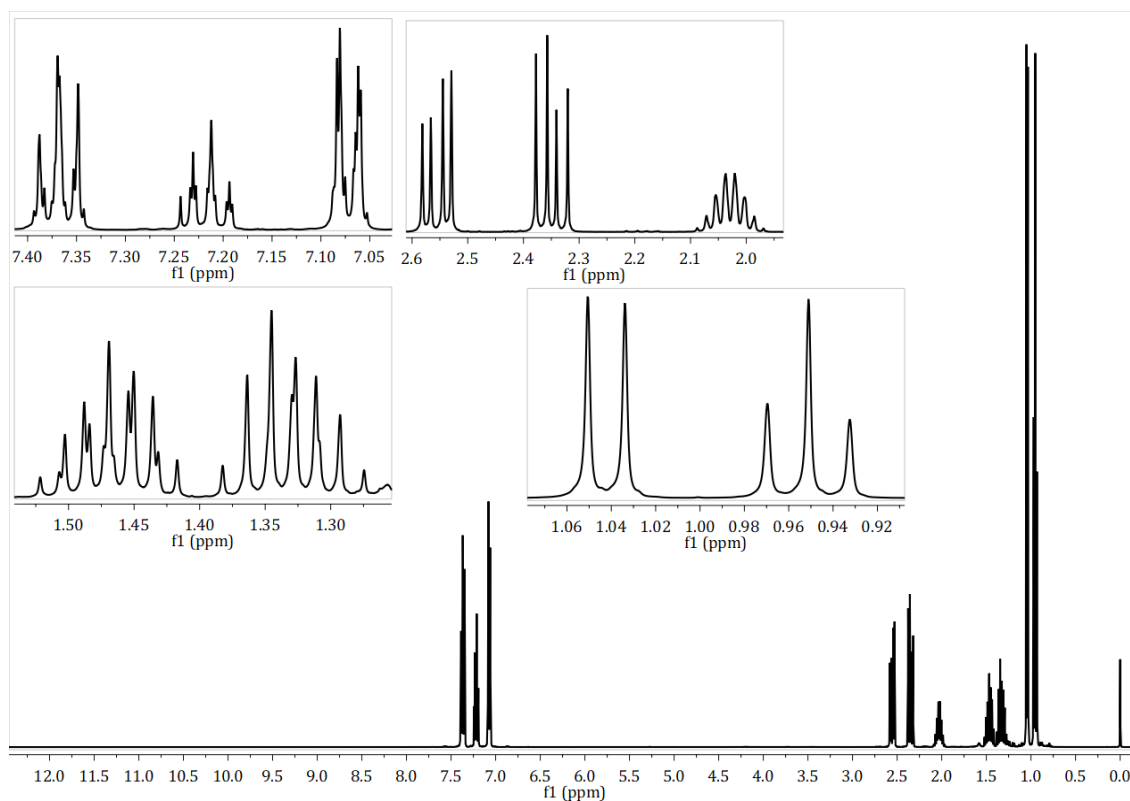

**Figure S17.**  $^1\text{H}$  NMR spectrum of phenyl 3-methylpentanoate (**1f**) recorded in  $\text{CDCl}_3$



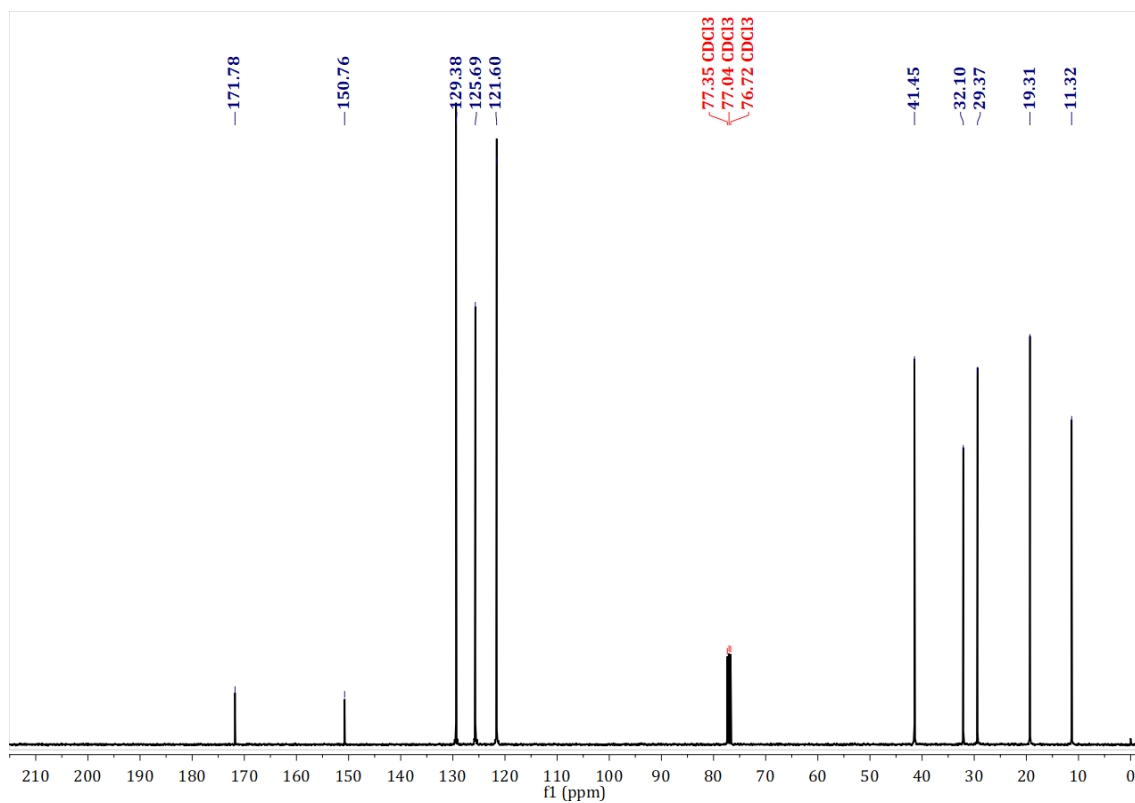

**Figure S18.** <sup>13</sup>C NMR spectrum of phenyl 3-methylpentanoate (**1f**) recorded in CDCl<sub>3</sub>

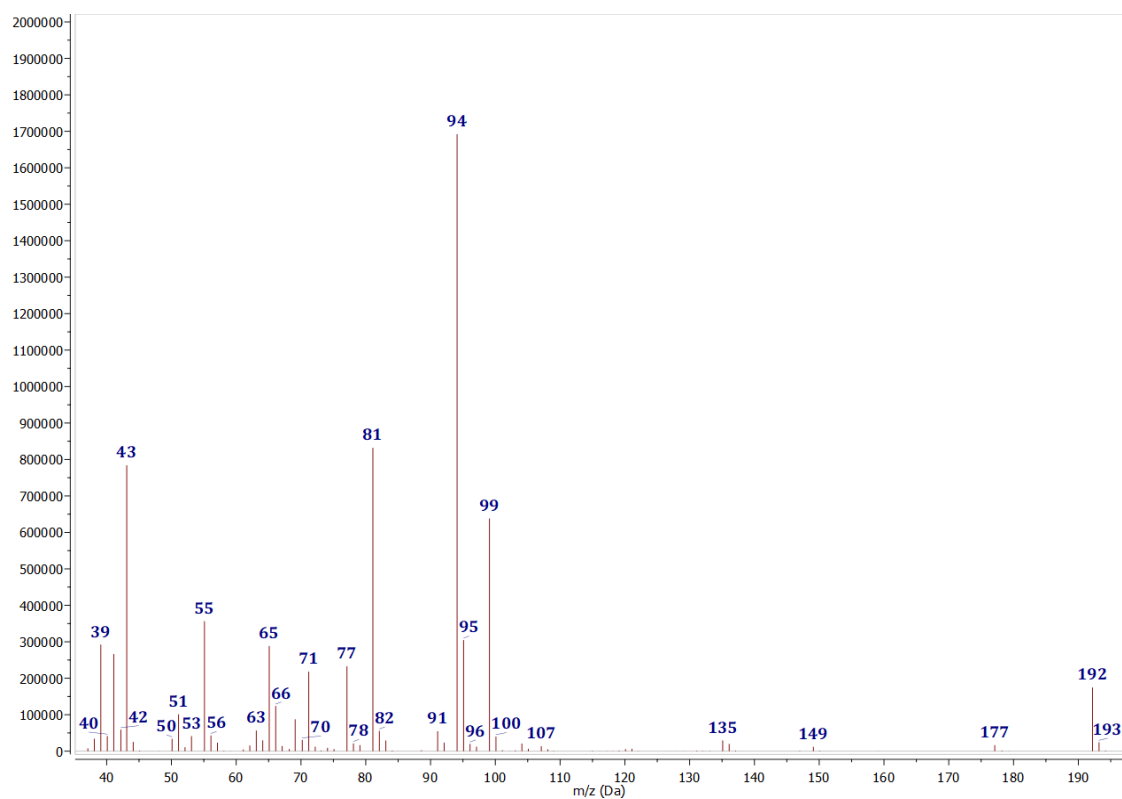

**Figure S19.** Mass spectrum of phenyl 4-methylpentanoate (**1g**)

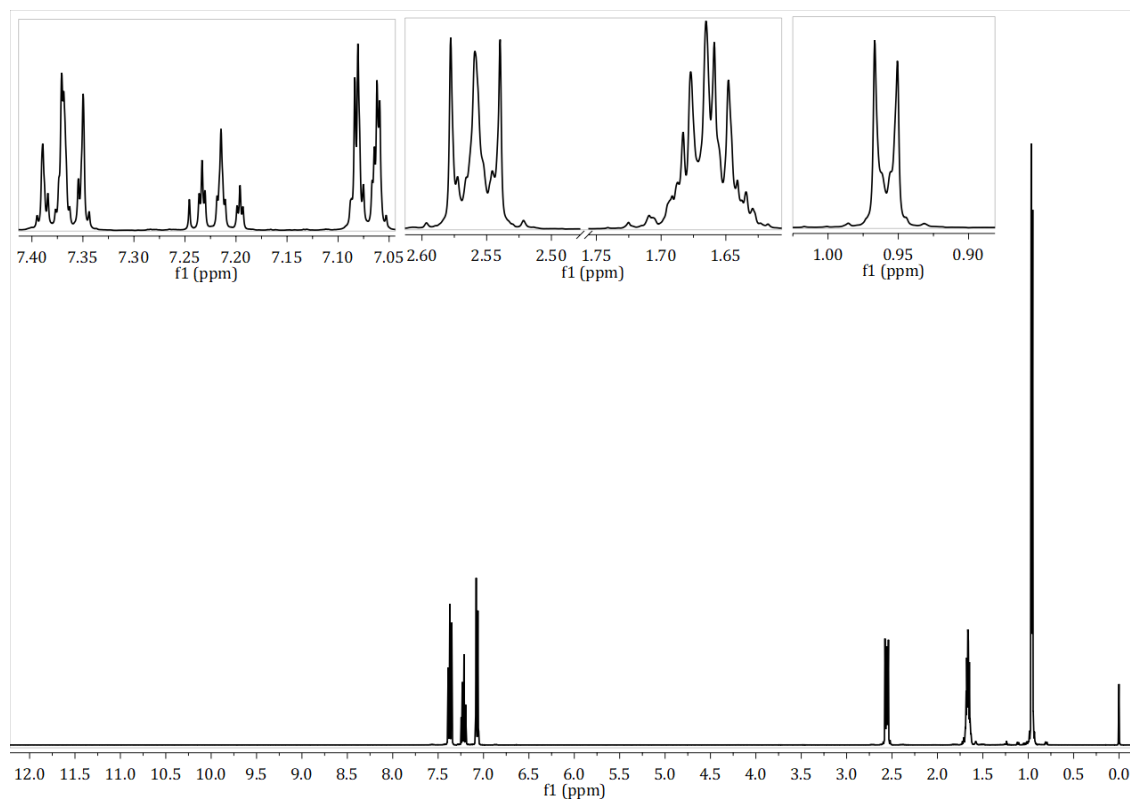

**Figure S20.** <sup>1</sup>H NMR spectrum of phenyl 4-methylpentanoate (**1g**) recorded in CDCl<sub>3</sub>

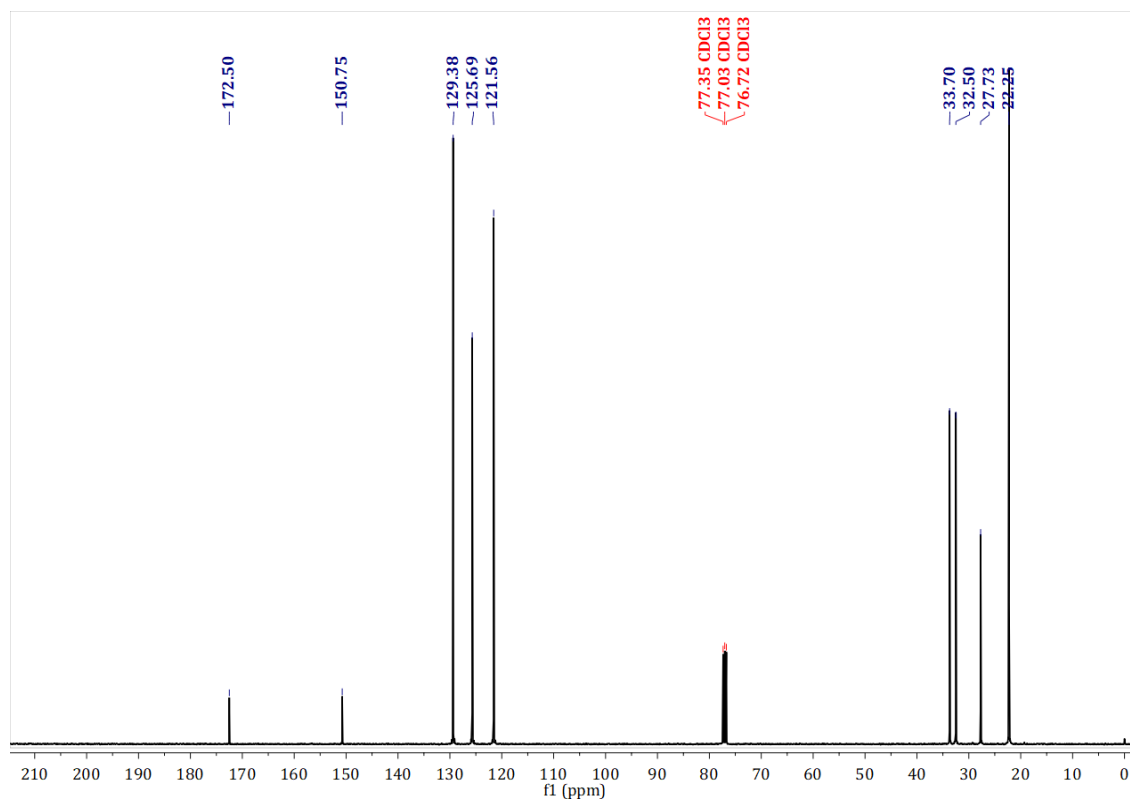

**Figure S21.** <sup>13</sup>C NMR spectrum of phenyl 4-methylpentanoate (**1g**) recorded in CDCl<sub>3</sub>

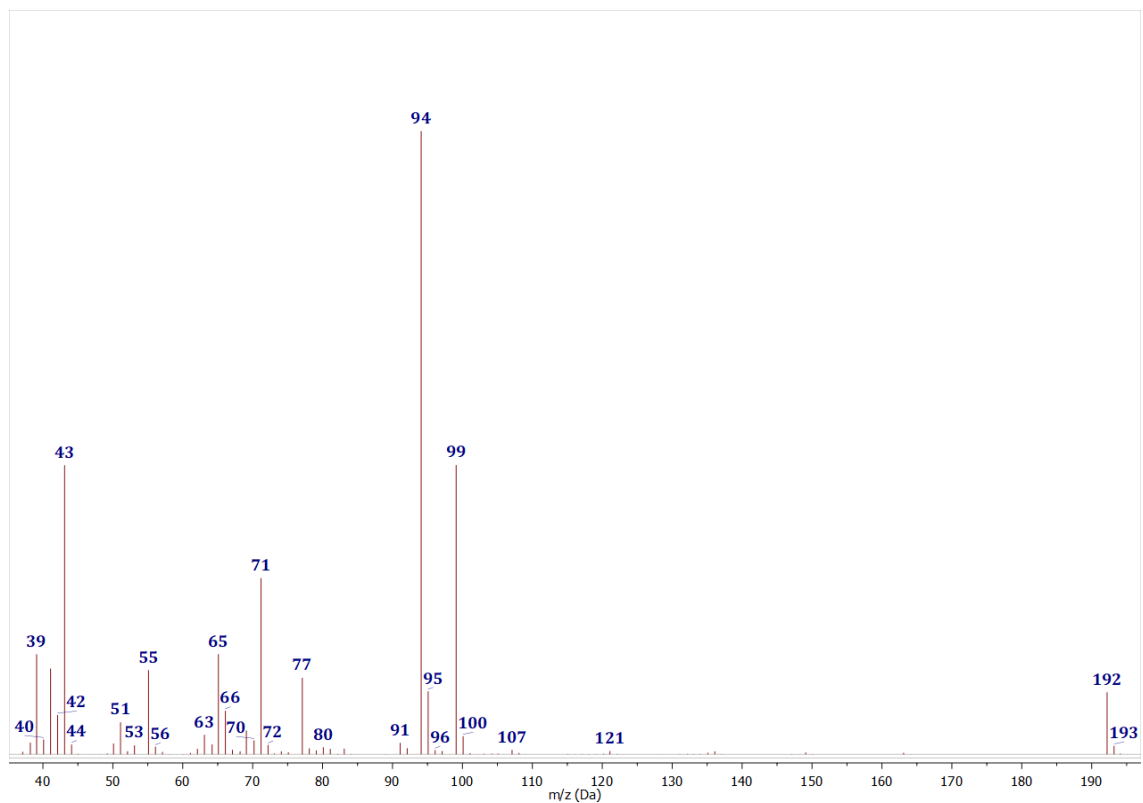

**Figure S22.** Mass spectrum of phenyl hexanoate (**1h**)

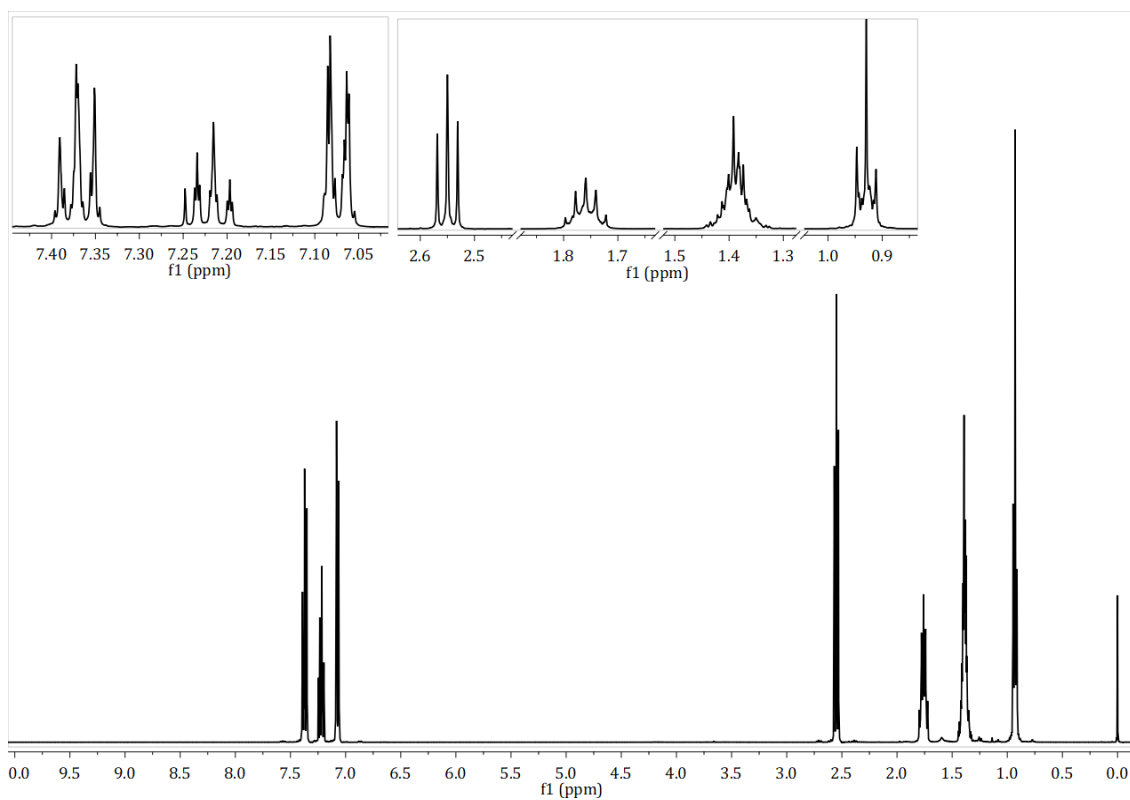

**Figure S23.**  $^1\text{H}$  NMR spectrum of phenyl hexanoate (**1h**) recorded in  $\text{CDCl}_3$

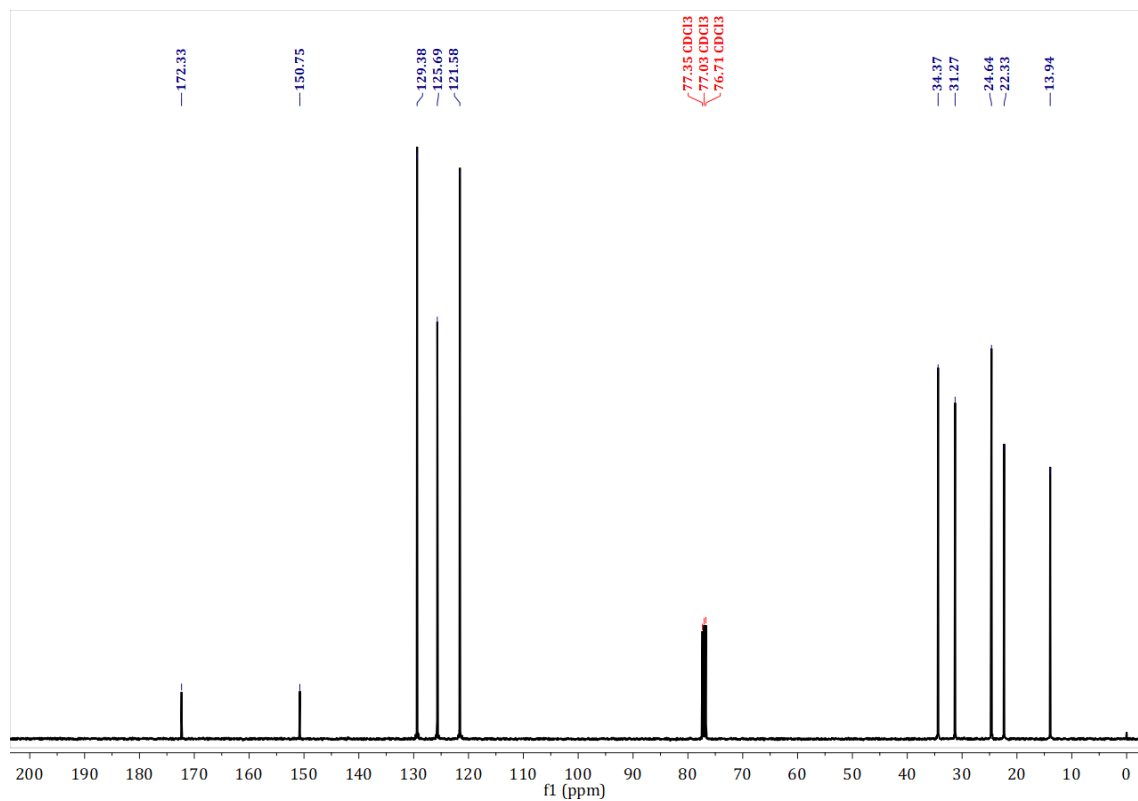

**Figure S24.** <sup>13</sup>C NMR spectrum of phenyl hexanoate (**1h**) recorded in CDCl<sub>3</sub>

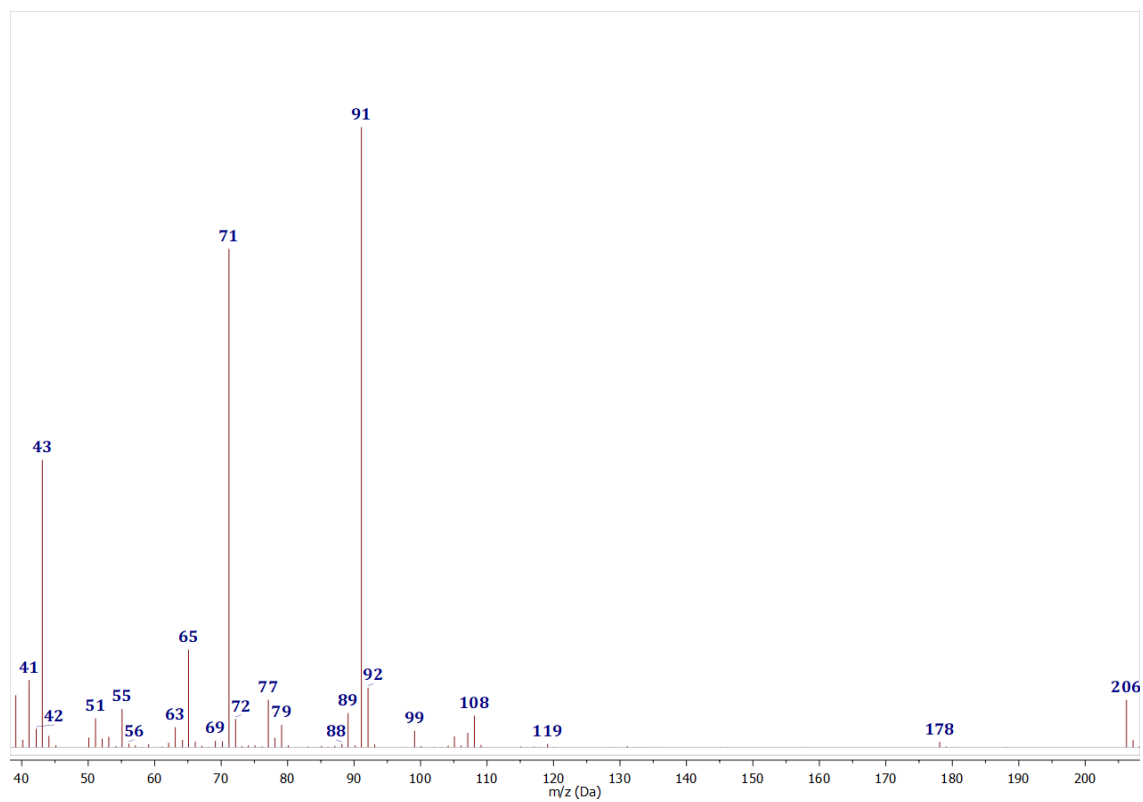

**Figure S25.** Mass spectrum of benzyl 2-ethylbutanoate (**2a**)

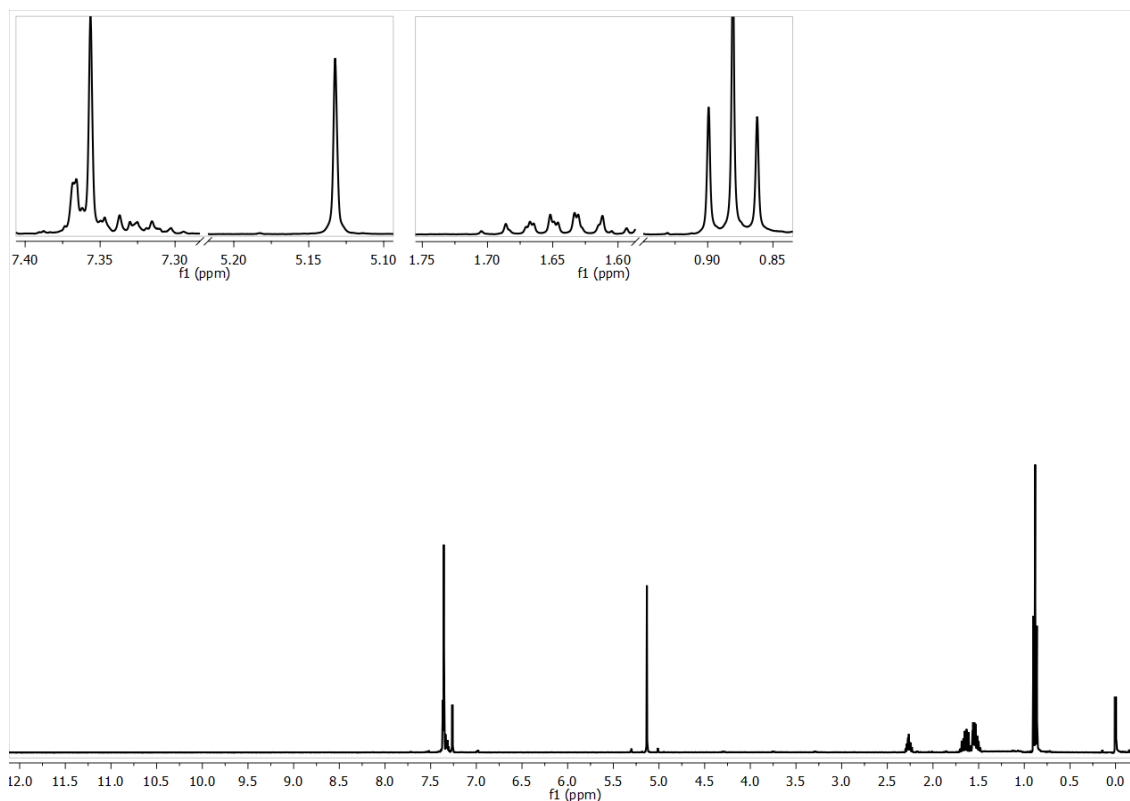

**Figure S26.**  $^1\text{H}$  NMR spectrum of benzyl 2-ethylbutanoate (**2a**) recorded in  $\text{CDCl}_3$

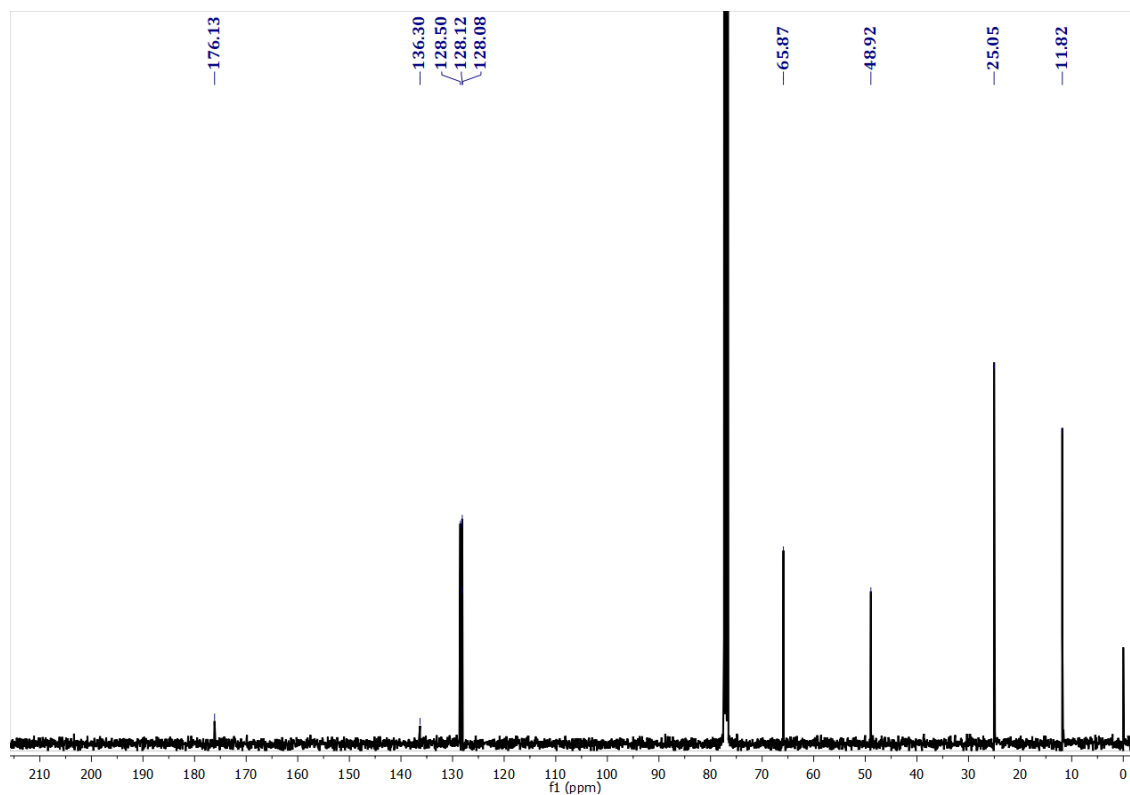

**Figure S27.**  $^{13}\text{C}$  NMR spectrum of benzyl 2-ethylbutanoate (**2a**) recorded in  $\text{CDCl}_3$

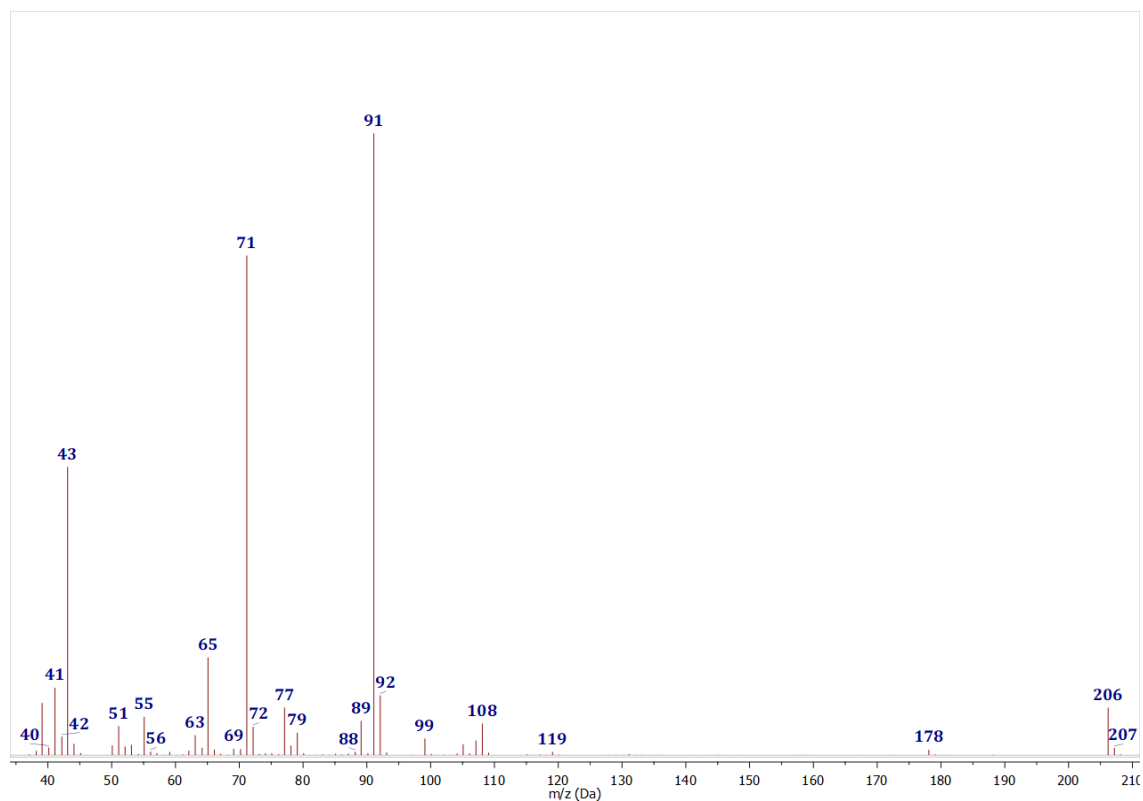

**Figure S28.** Mass spectrum of benzyl 2,2-dimethylbutanoate (**2b**)

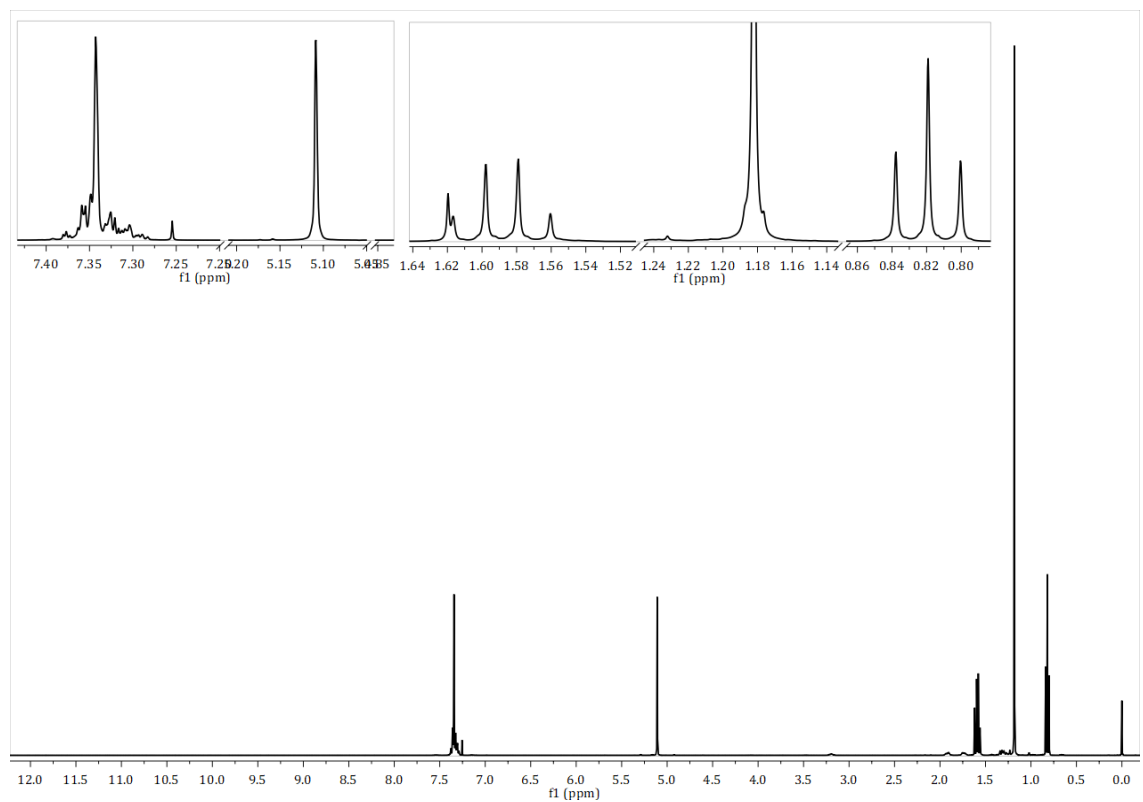

**Figure S29.**  $^1\text{H}$  NMR spectrum of benzyl 2,2-dimethylbutanoate (**2b**) recorded in  $\text{CDCl}_3$

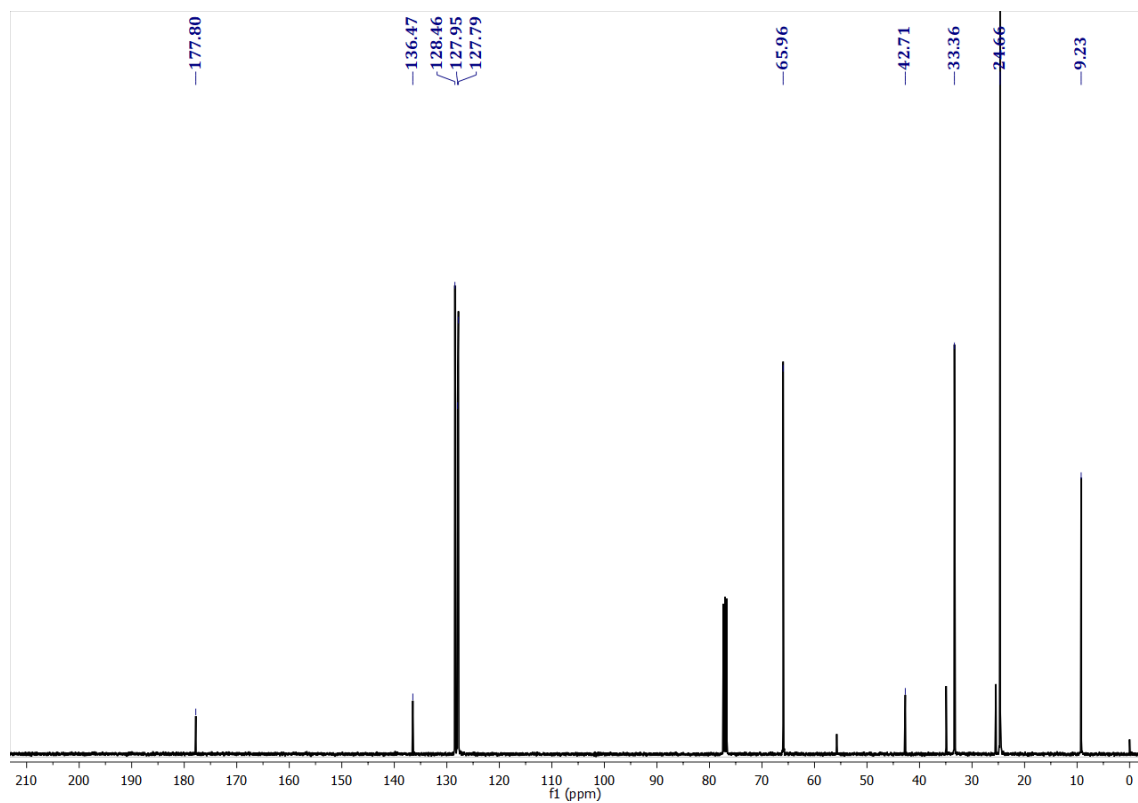

**Figure S30.** <sup>13</sup>C NMR spectrum of benzyl 2,2-dimethylbutanoate (**2b**) recorded in CDCl<sub>3</sub>

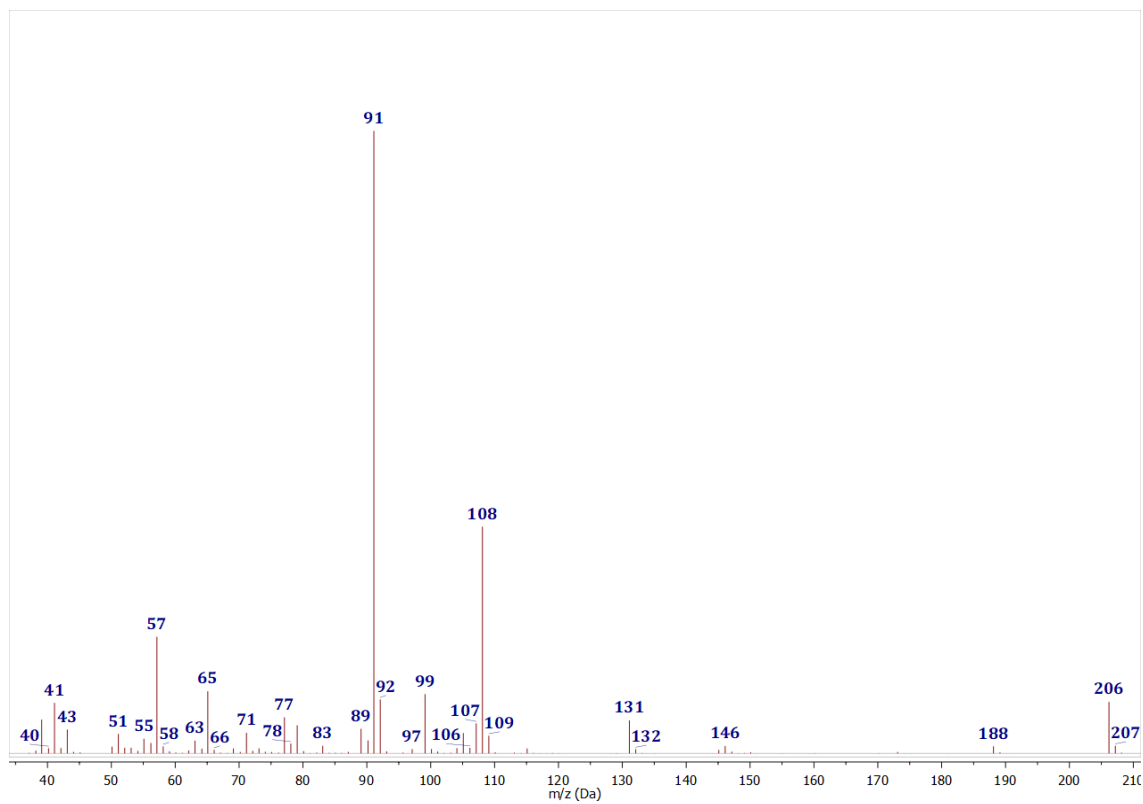

**Figure S31.** Mass spectrum of benzyl 3,3-dimethylbutanoate (**2c**)

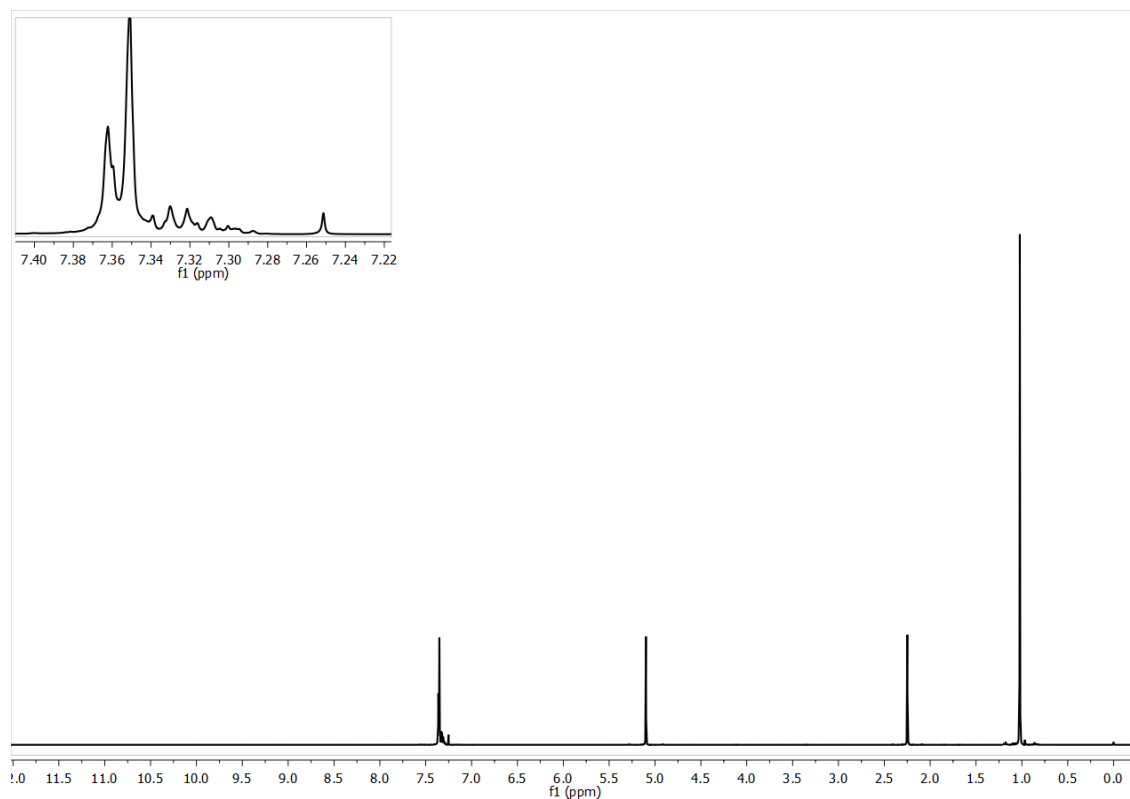

**Figure S32.** <sup>1</sup>H NMR spectrum of benzyl 3,3-dimethylbutanoate (**2c**) recorded in CDCl<sub>3</sub>

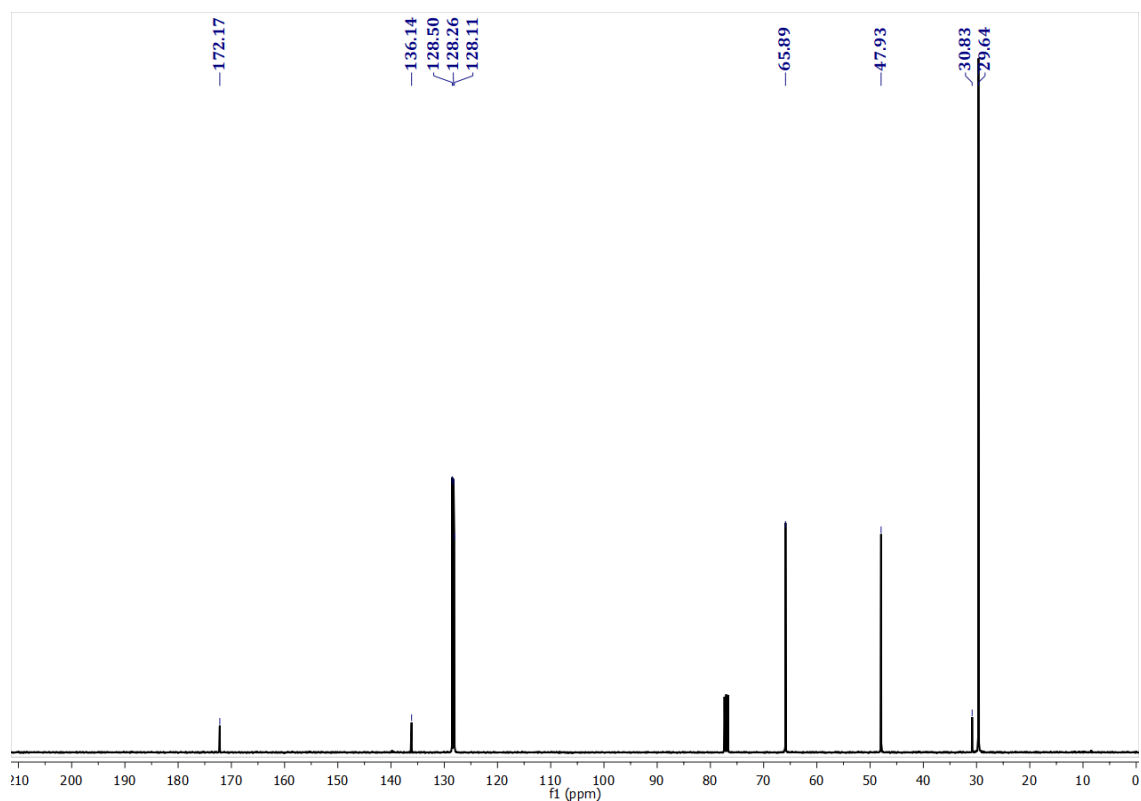

**Figure S33.** <sup>13</sup>C NMR spectrum of benzyl 3,3-dimethylbutanoate (**2c**) recorded in CDCl<sub>3</sub>



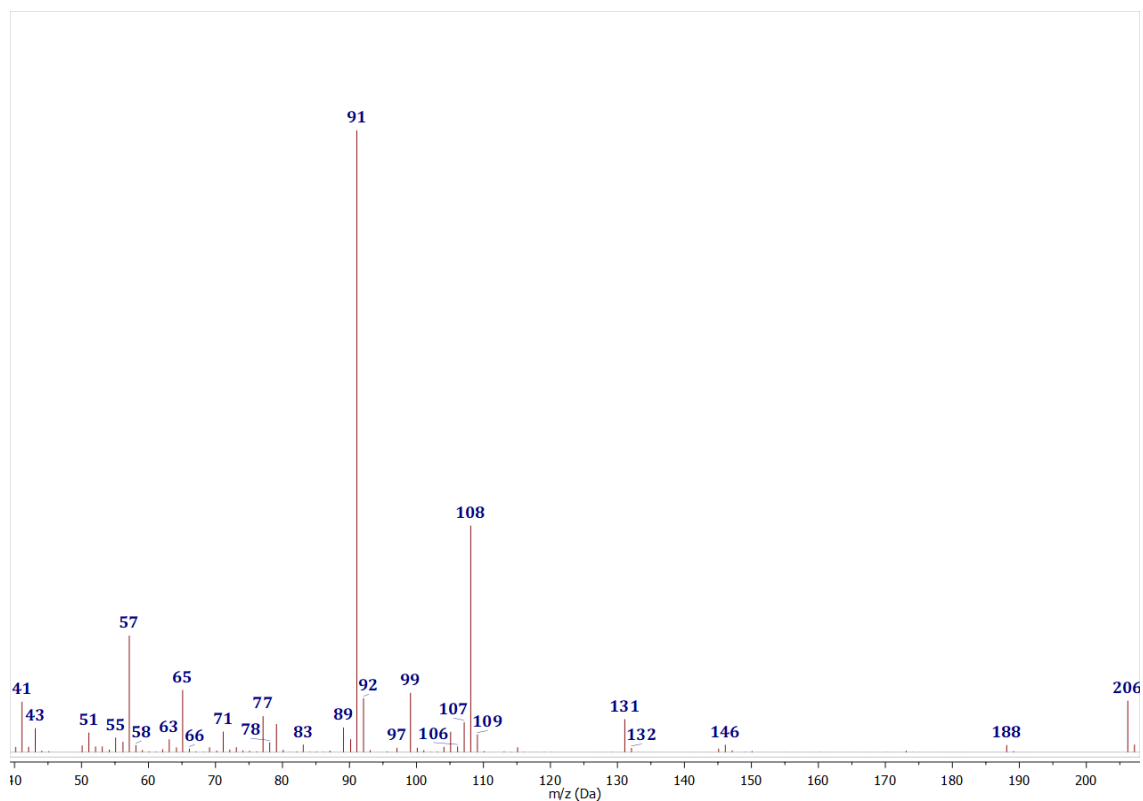

**Figure S34.** Mass spectrum of benzyl 2,3-dimethylbutanoate (**2d**)

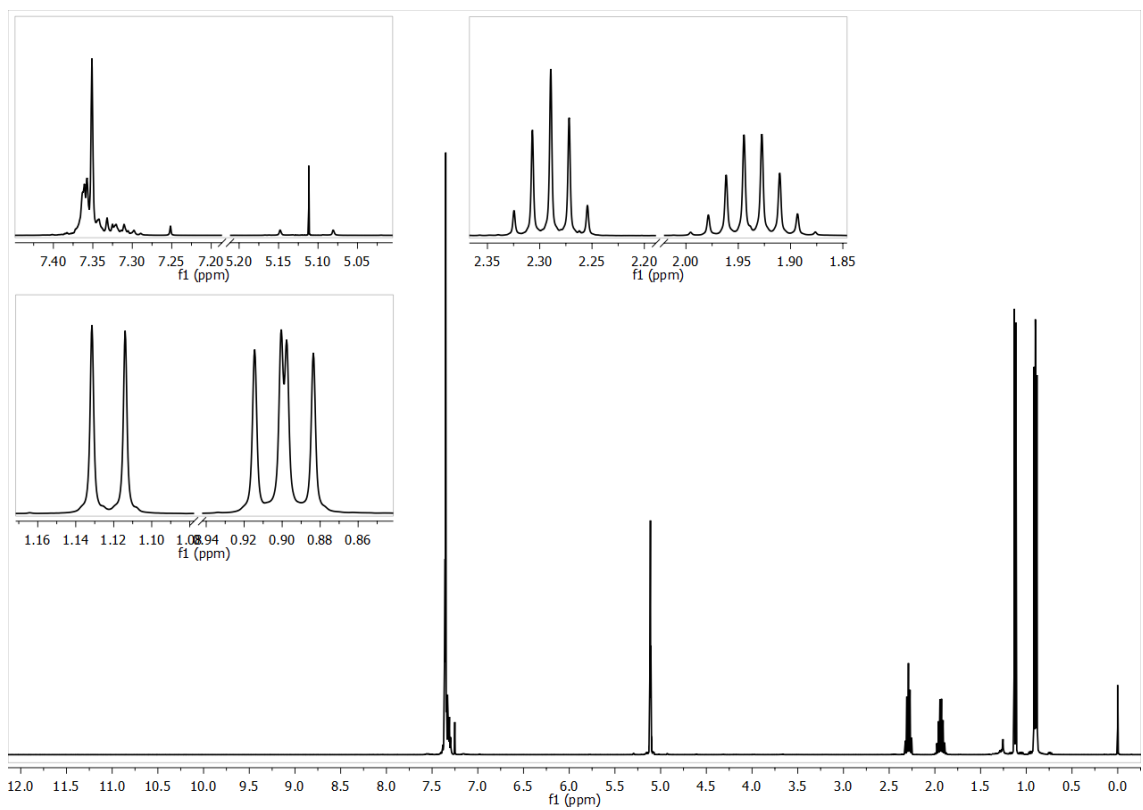

**Figure S35.**  $^1\text{H}$  NMR spectrum of benzyl 2,3-dimethylbutanoate (**2d**) recorded in  $\text{CDCl}_3$

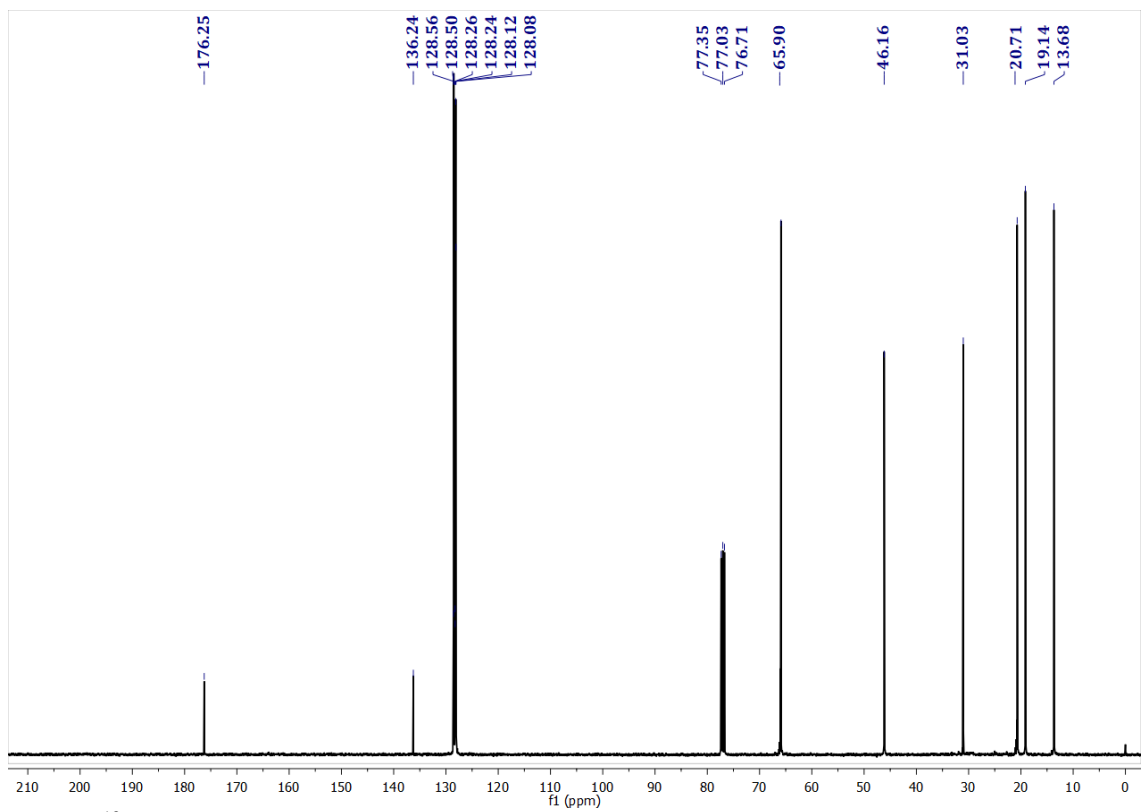

**Figure S36.**  $^{13}\text{C}$  NMR spectrum of benzyl 2,3-dimethylbutanoate (**2d**) recorded in  $\text{CDCl}_3$

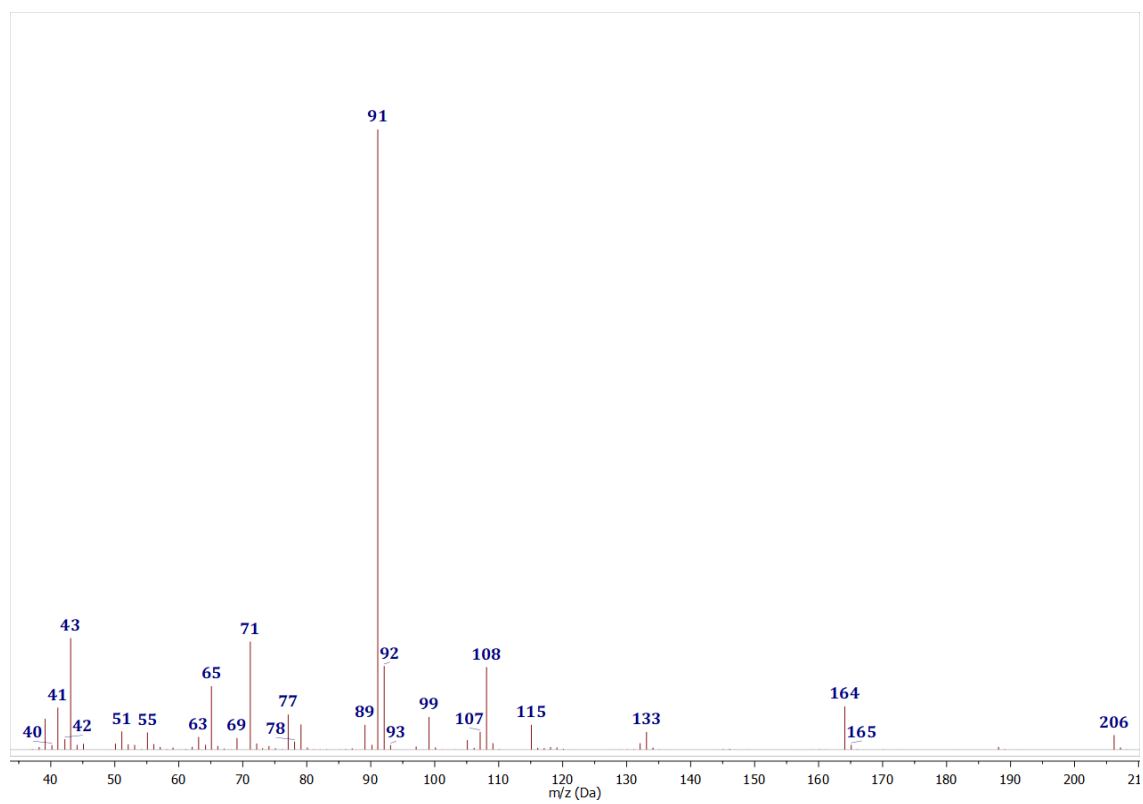

**Figure S37.** Mass spectrum of benzyl 2-methylpentanoate (**2e**)

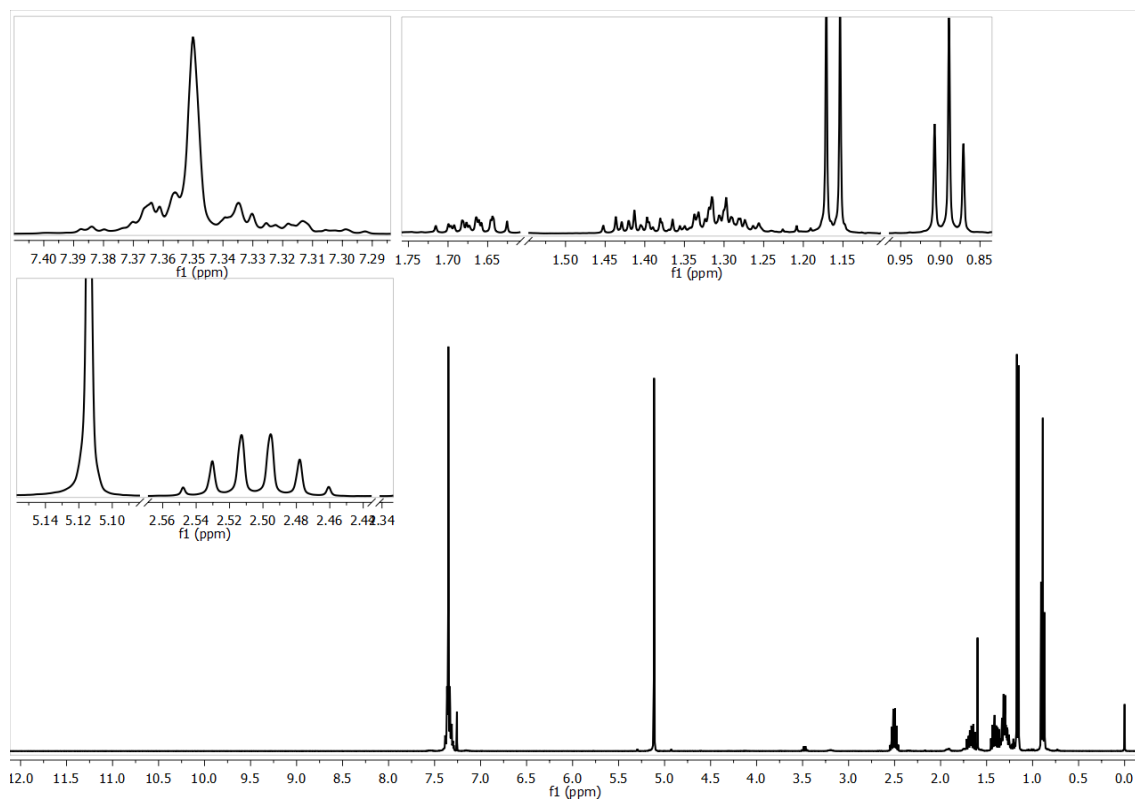

**Figure S38.**  $^1\text{H}$  NMR spectrum of benzyl 2-methylpentanoate (**2e**) recorded in  $\text{CDCl}_3$

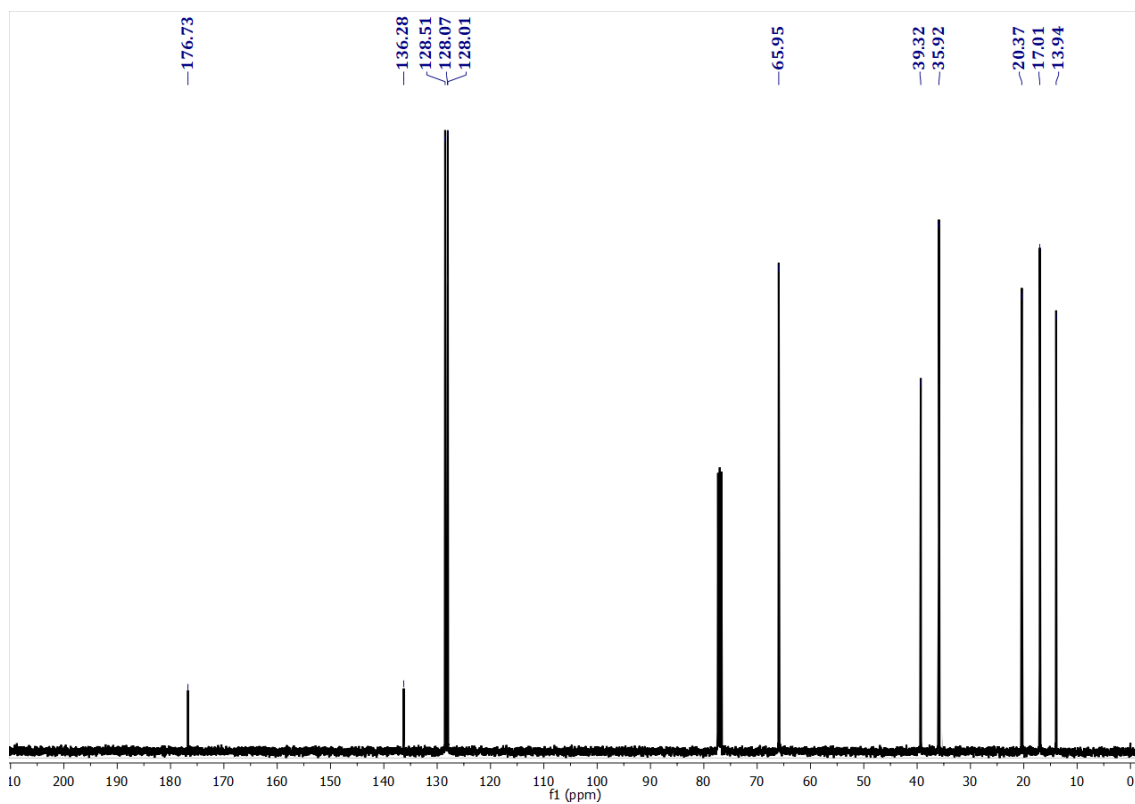

**Figure S39.**  $^{13}\text{C}$  NMR spectrum of benzyl 2-methylpentanoate (**2e**) recorded in  $\text{CDCl}_3$

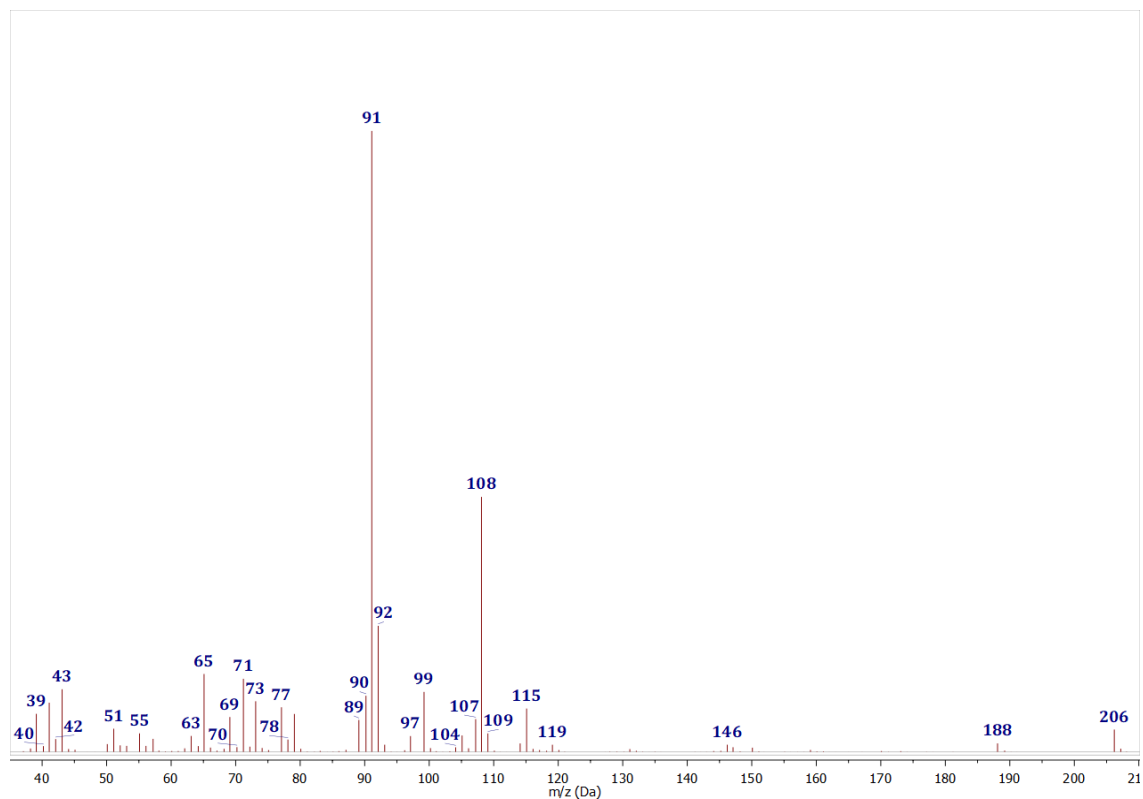

**Figure S40.** Mass spectrum of benzyl 3-methylpentanoate (**2f**)

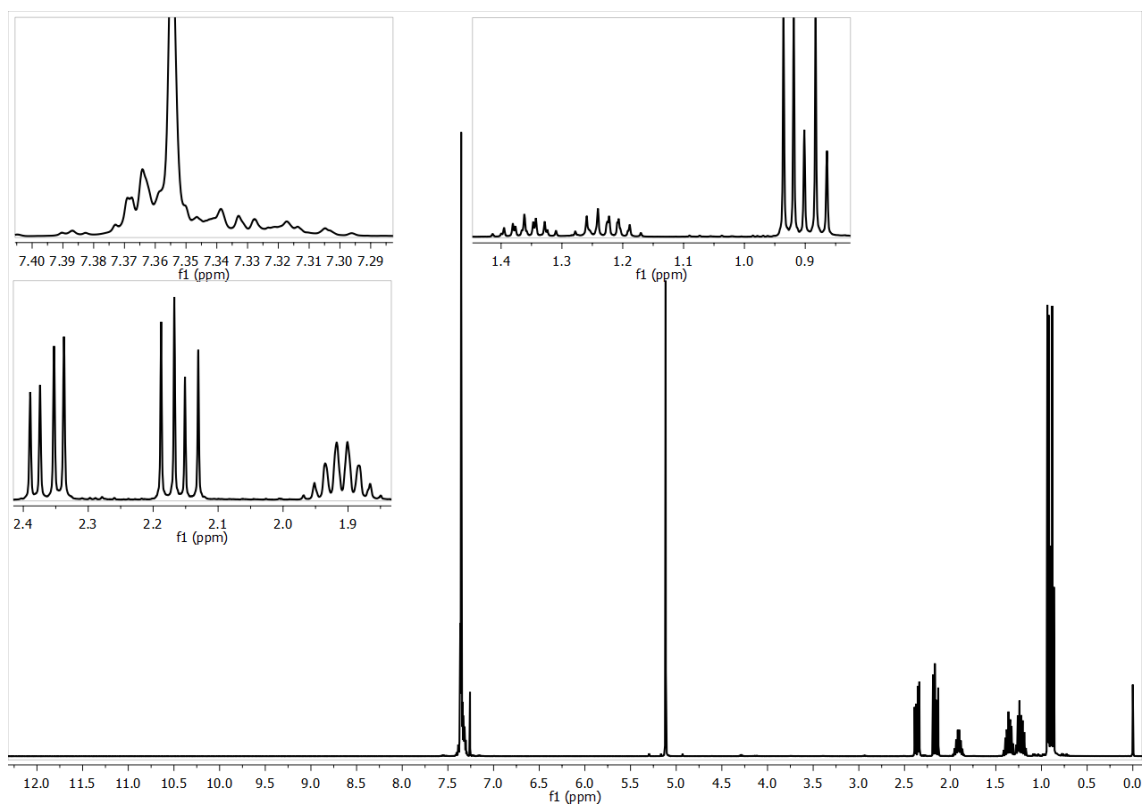

**Figure S41.**  $^1\text{H}$  NMR spectrum of benzyl 3-methylpentanoate (**2f**) recorded in  $\text{CDCl}_3$

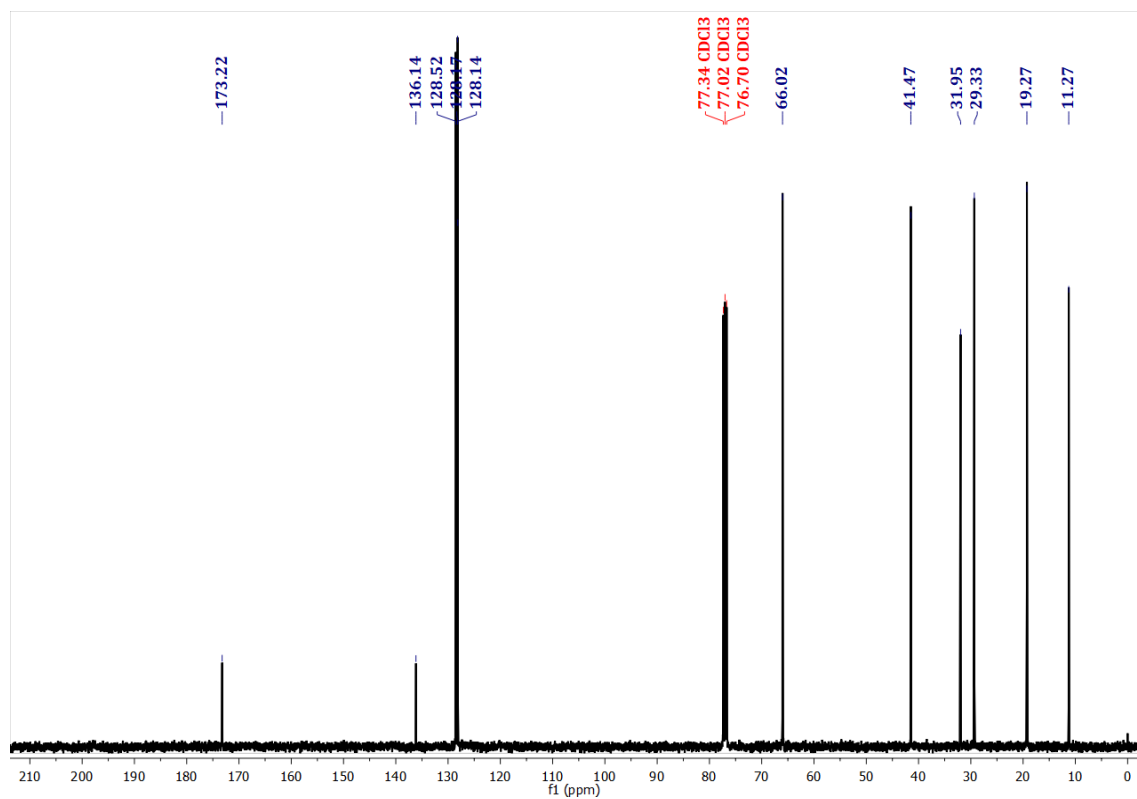

**Figure S42.** <sup>13</sup>C NMR spectrum of benzyl 3-methylpentanoate (**2f**) recorded in CDCl<sub>3</sub>

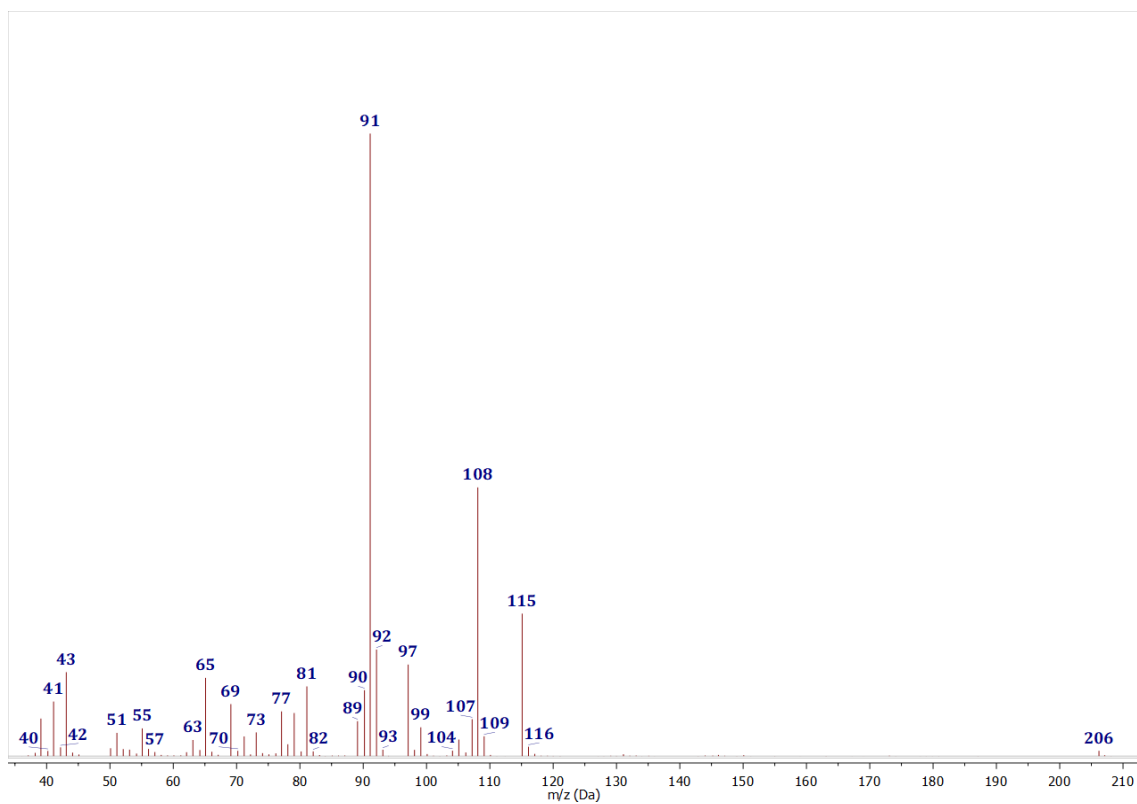

**Figure S43.** Mass spectrum of benzyl 4-methylpentanoate (**2g**)

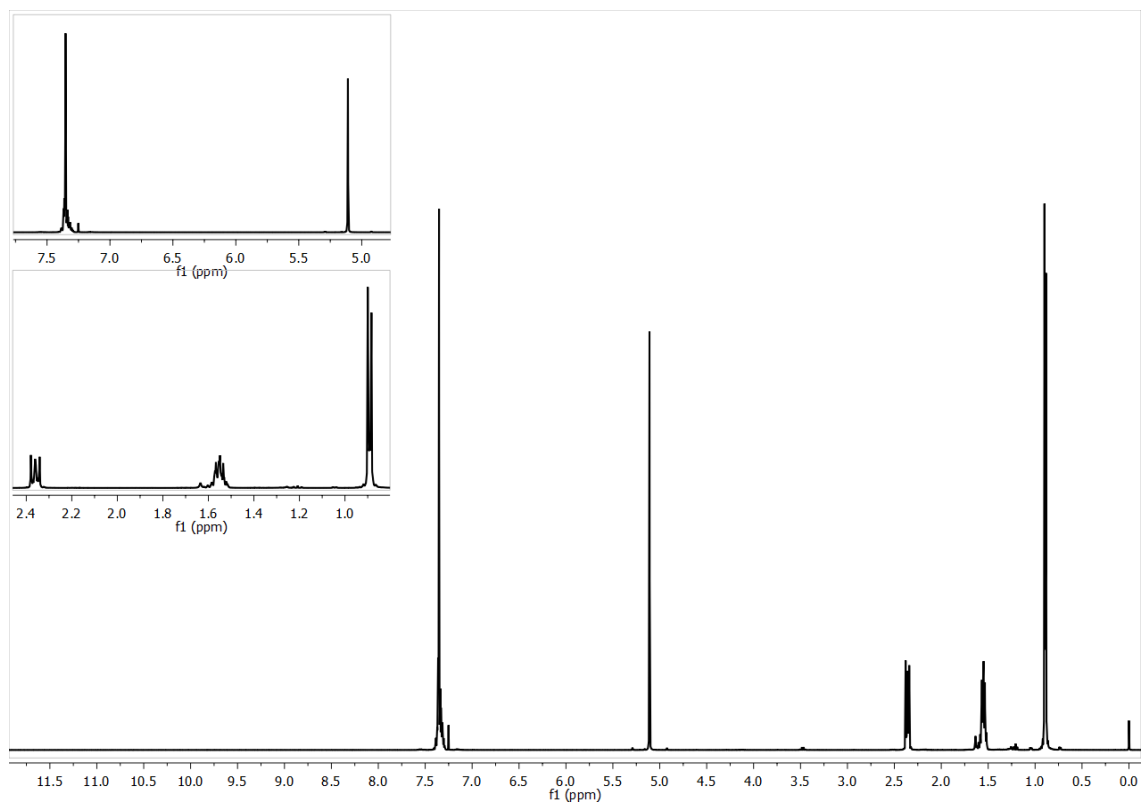

**Figure S44.**  $^1\text{H}$  NMR spectrum of benzyl 4-methylpentanoate (**2g**) recorded in  $\text{CDCl}_3$

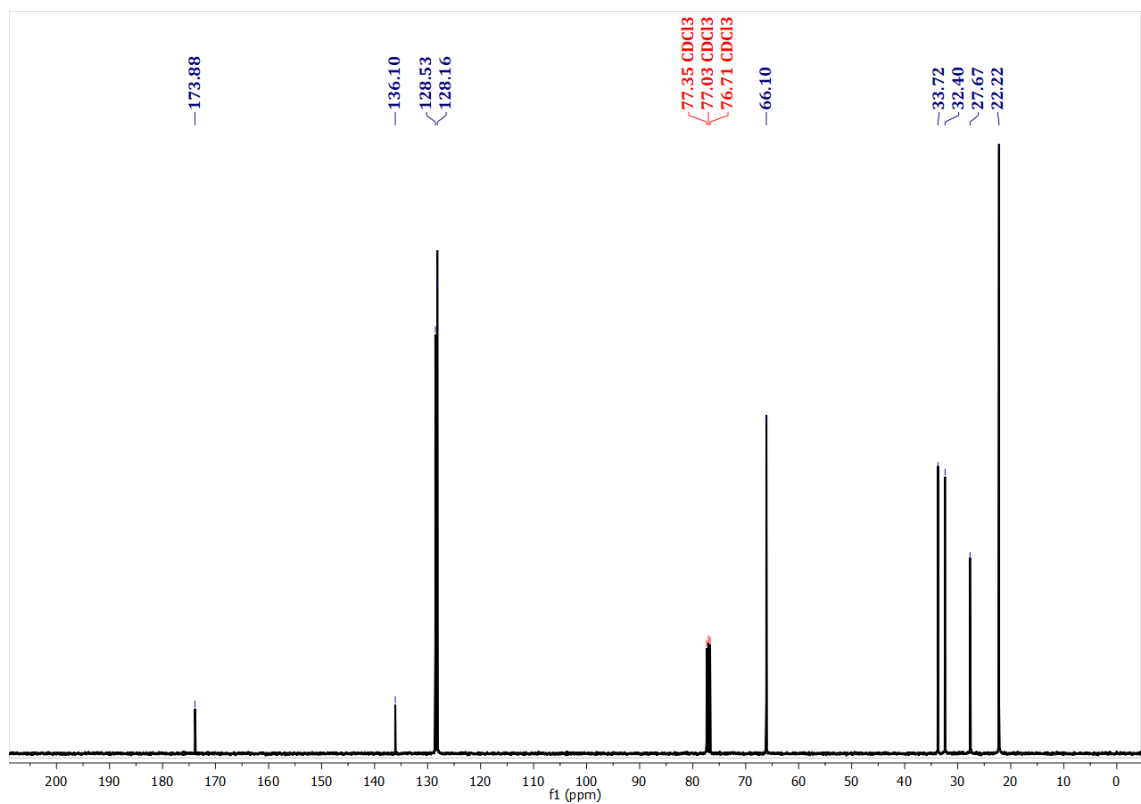

**Figure S45.**  $^{13}\text{C}$  NMR spectrum of benzyl 4-methylpentanoate (**2g**) recorded in  $\text{CDCl}_3$

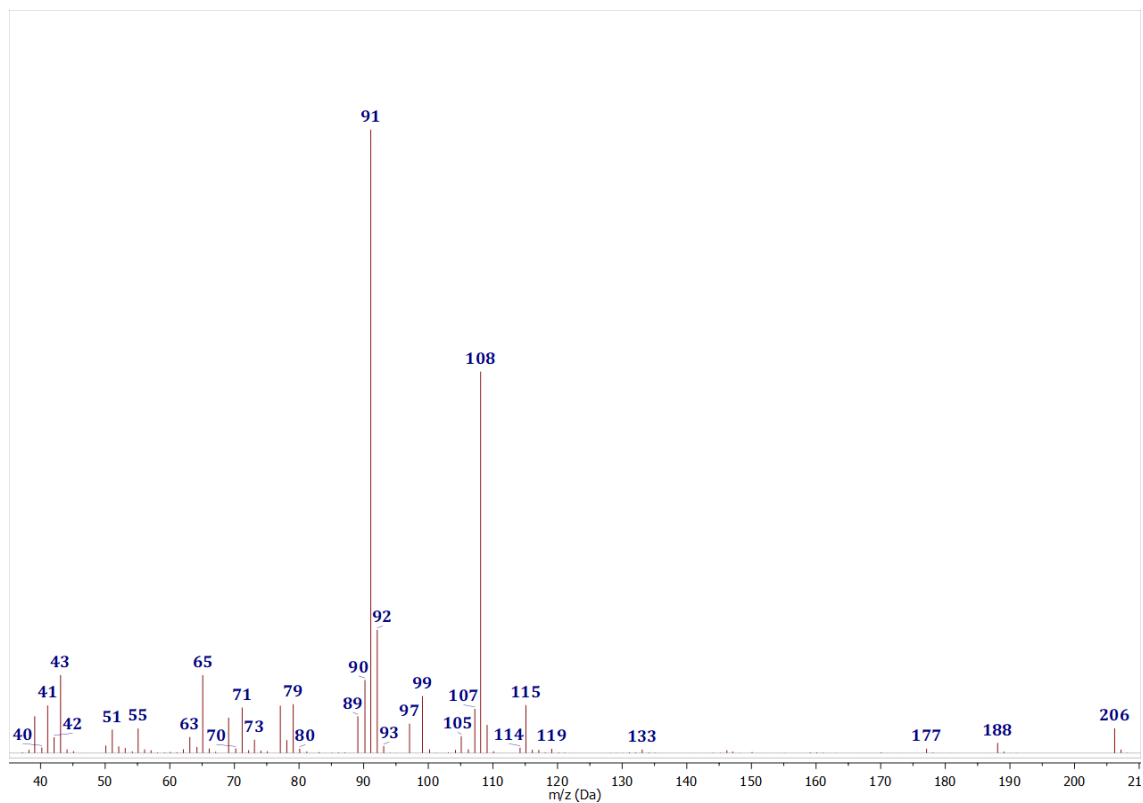

**Figure S46.** Mass spectrum of benzyl hexanoate (**2h**)

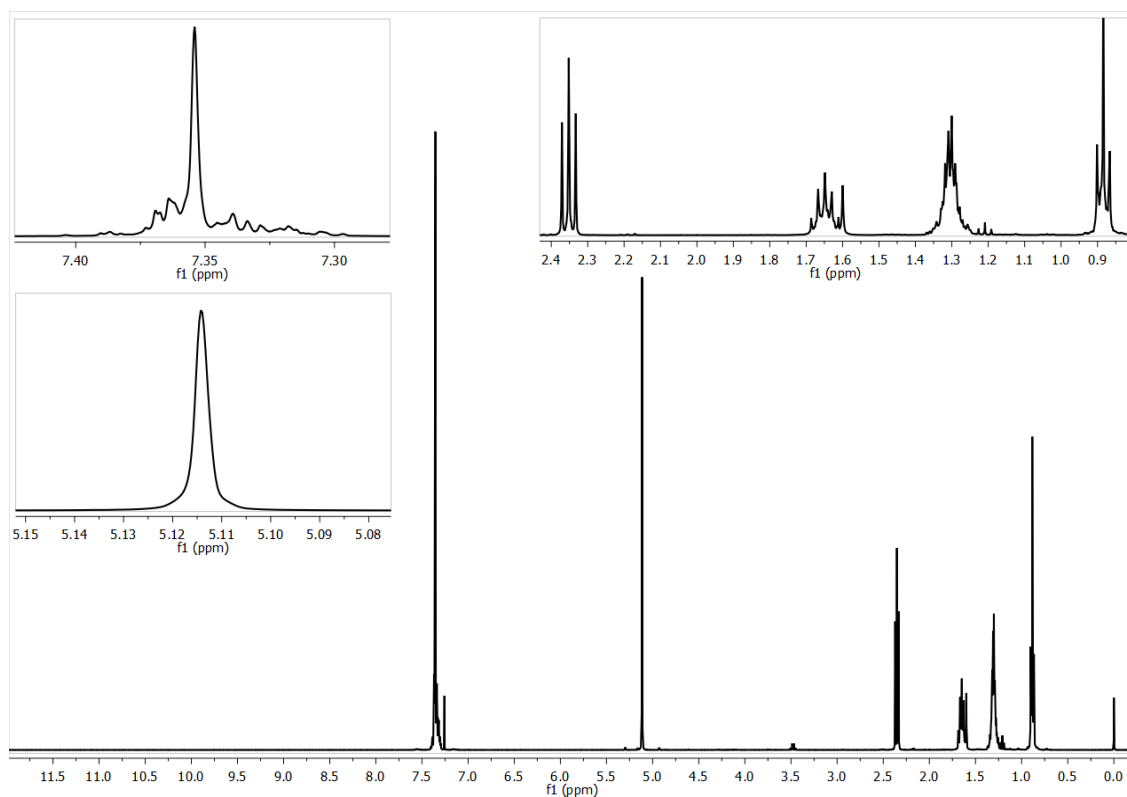

**Figure S47.**  $^1\text{H}$  NMR spectrum of benzyl hexanoate (**2h**) recorded in  $\text{CDCl}_3$

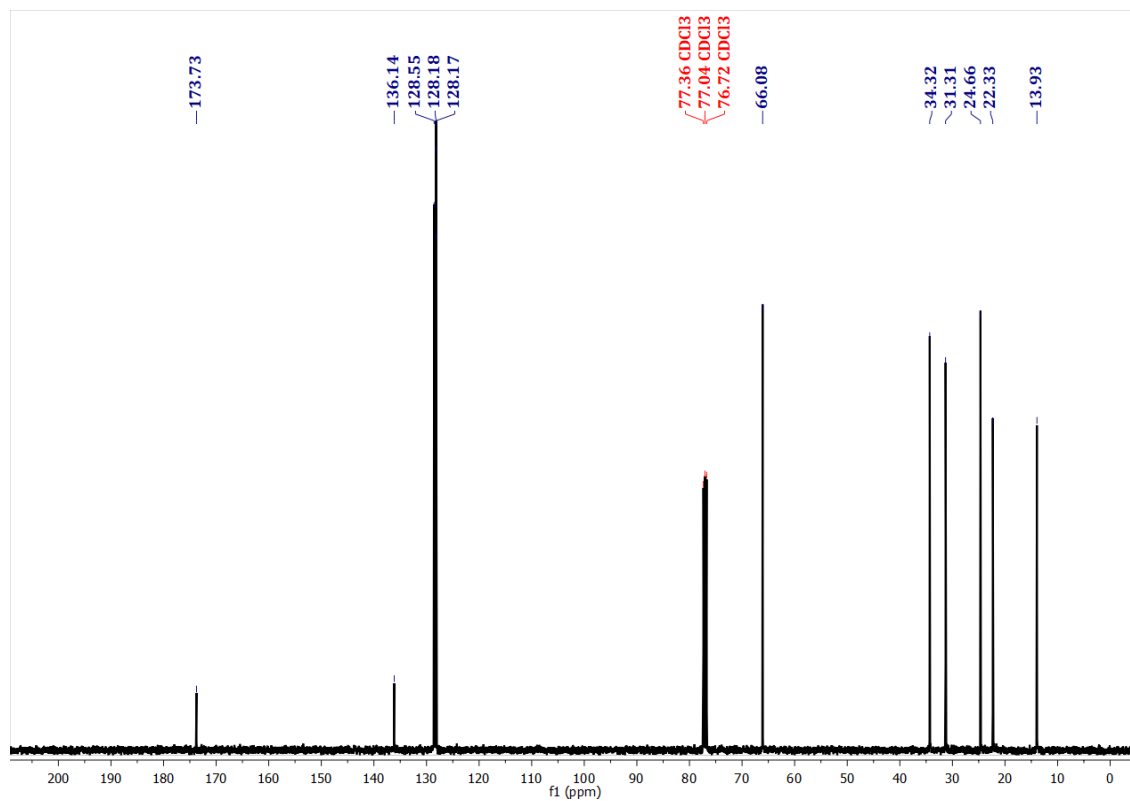

**Figure S48.** <sup>13</sup>C NMR spectrum of benzyl hexanoate (**2h**) recorded in CDCl<sub>3</sub>

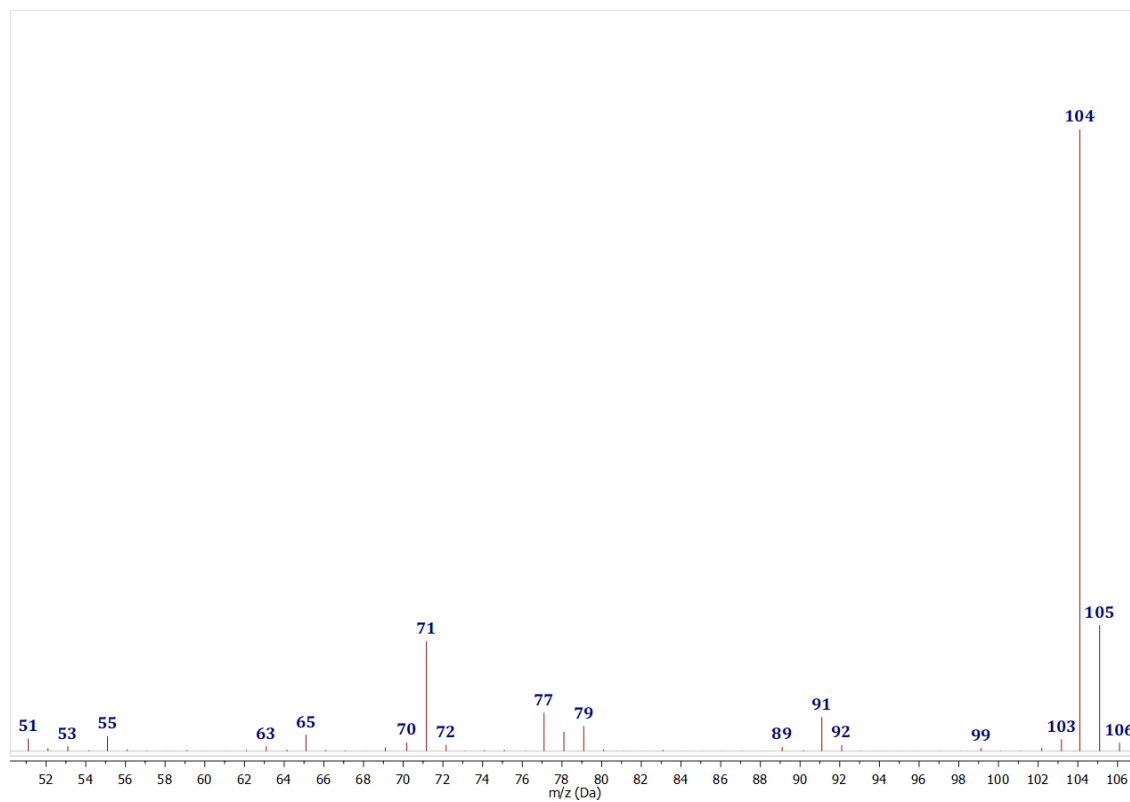

**Figure S49.** Mass spectrum of phenethyl 2-ethylbutanoate (**3a**)



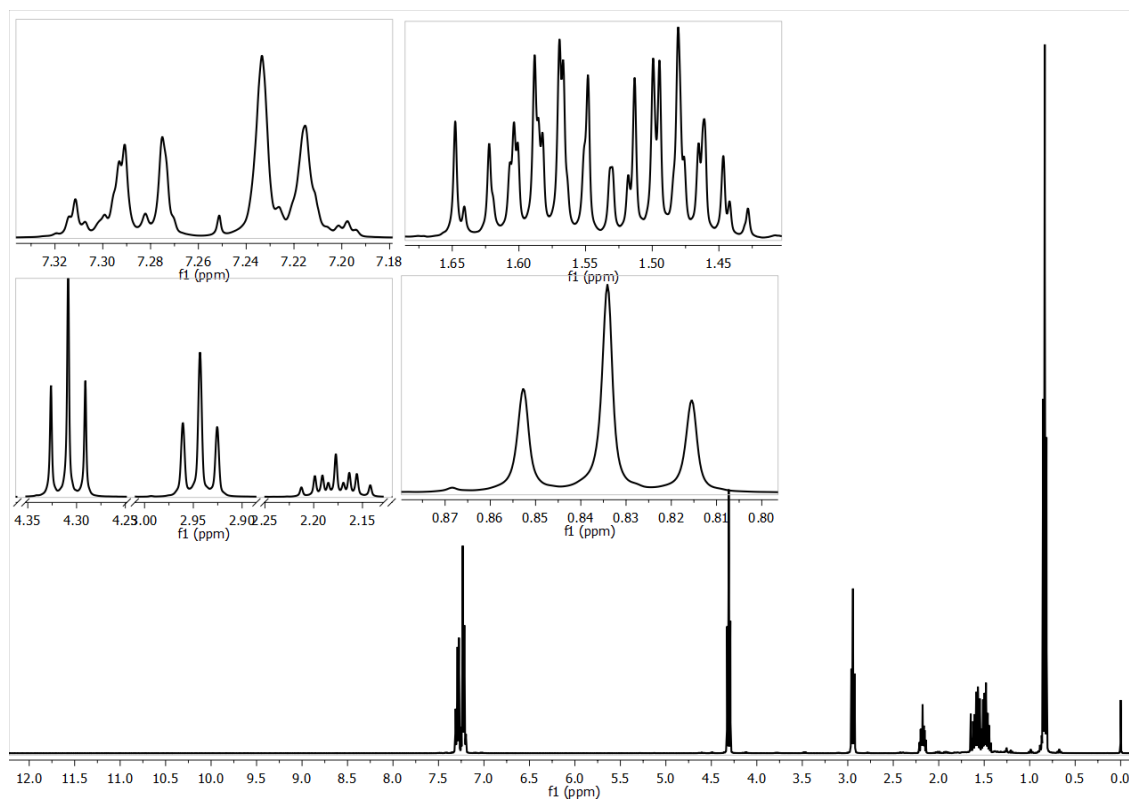

**Figure S50.**  $^1\text{H}$  NMR spectrum of phenethyl 2-ethylbutanoate (**3a**) recorded in  $\text{CDCl}_3$

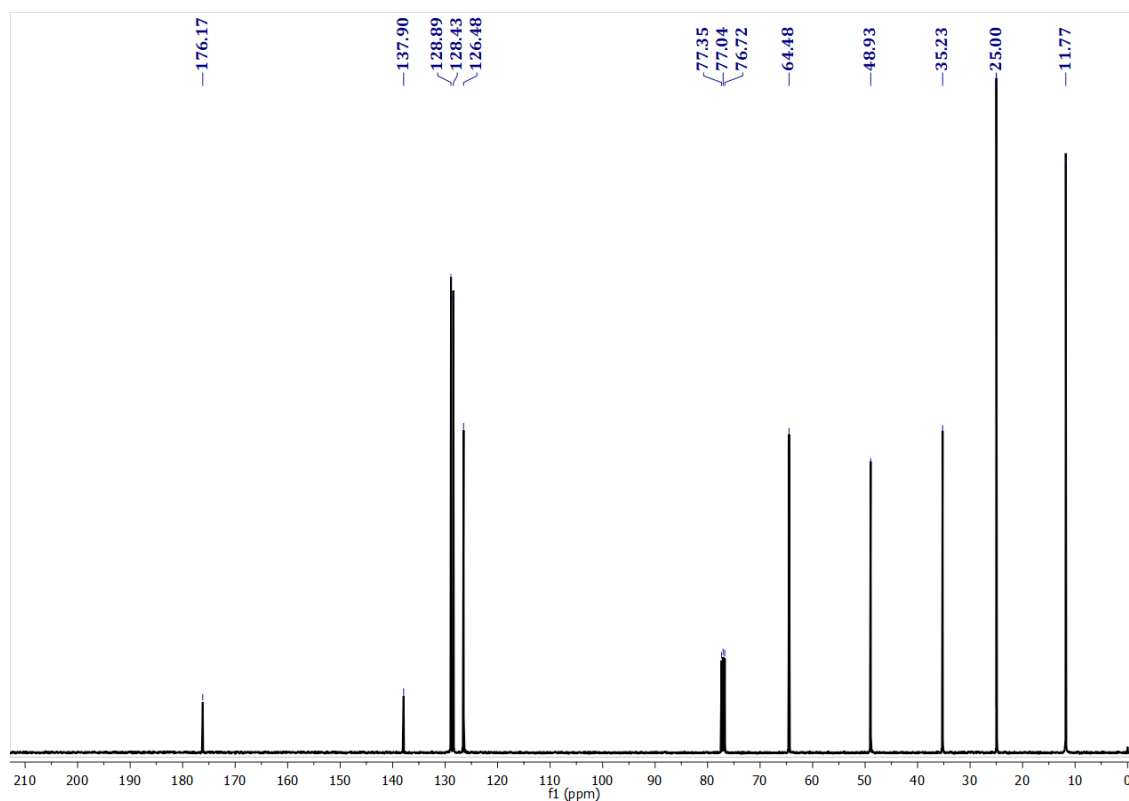

**Figure S51.**  $^{13}\text{C}$  NMR spectrum of phenethyl 2-ethylbutanoate (**3a**) recorded in  $\text{CDCl}_3$

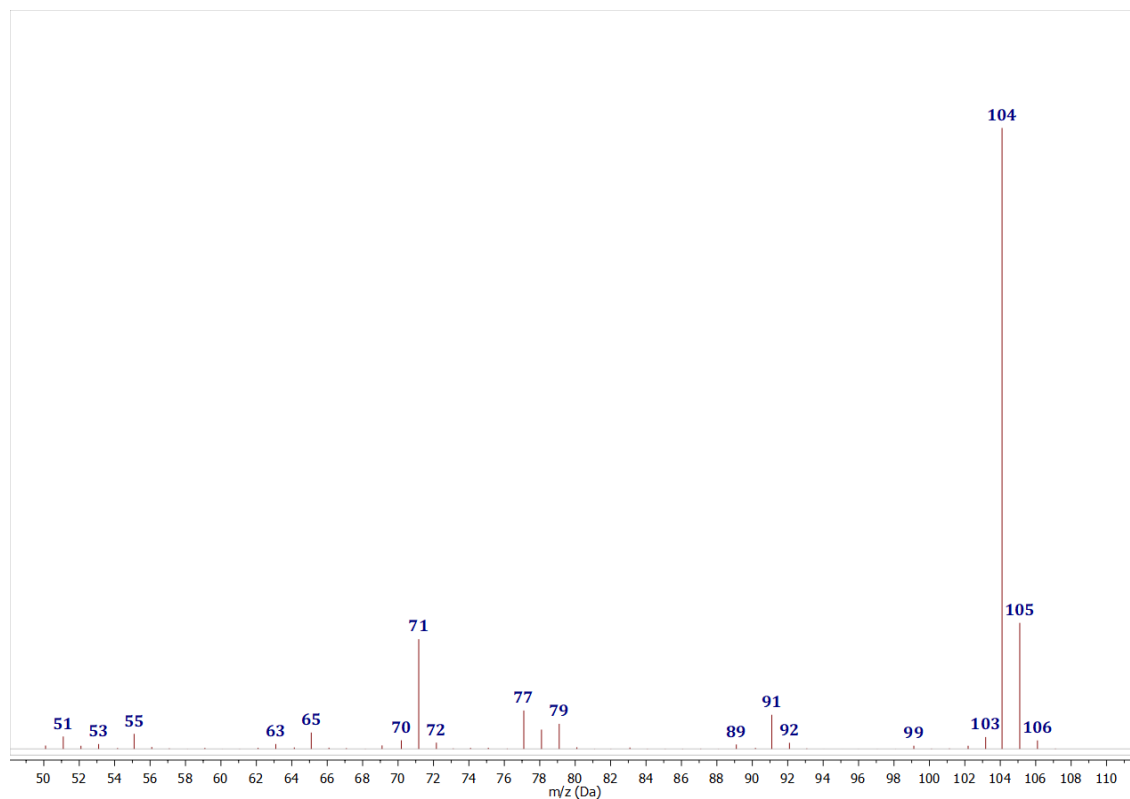

**Figure S52.** Mass spectrum of phenethyl 2,2-dimethylbutanoate (**3b**)

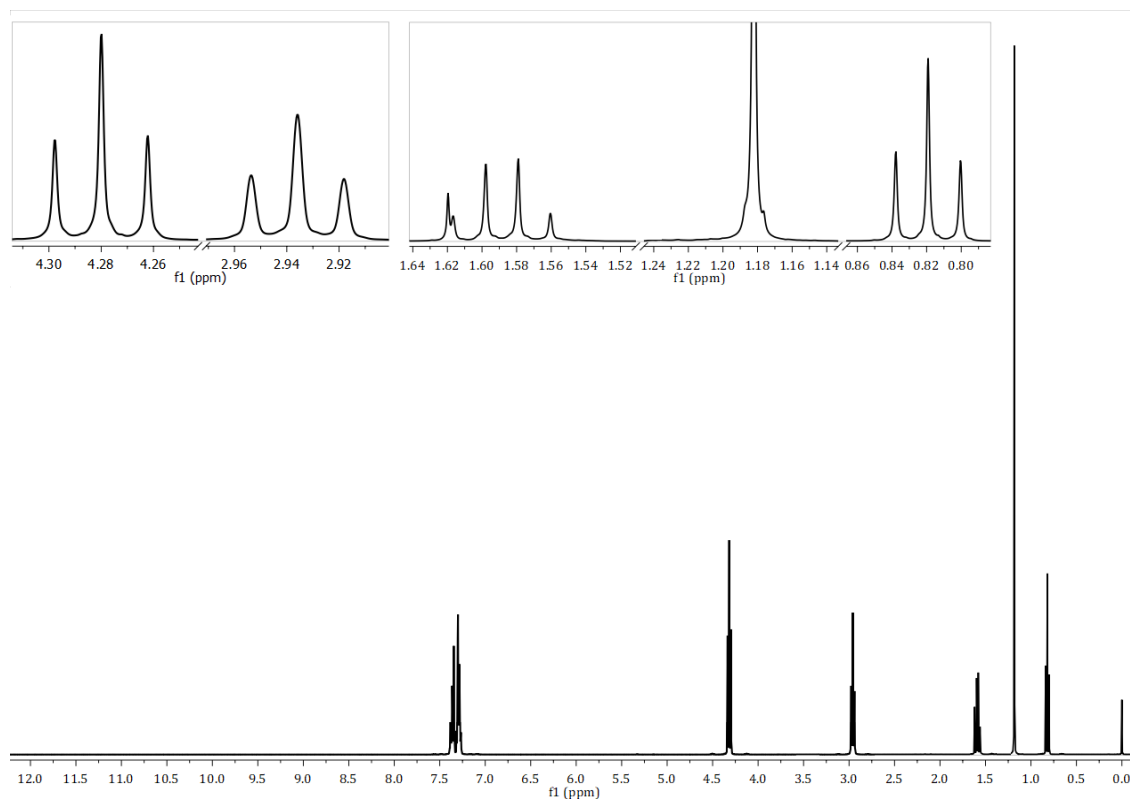

**Figure S53.**  $^1\text{H}$  NMR spectrum of phenethyl 2,2-dimethylbutanoate (**3b**) recorded in  $\text{CDCl}_3$

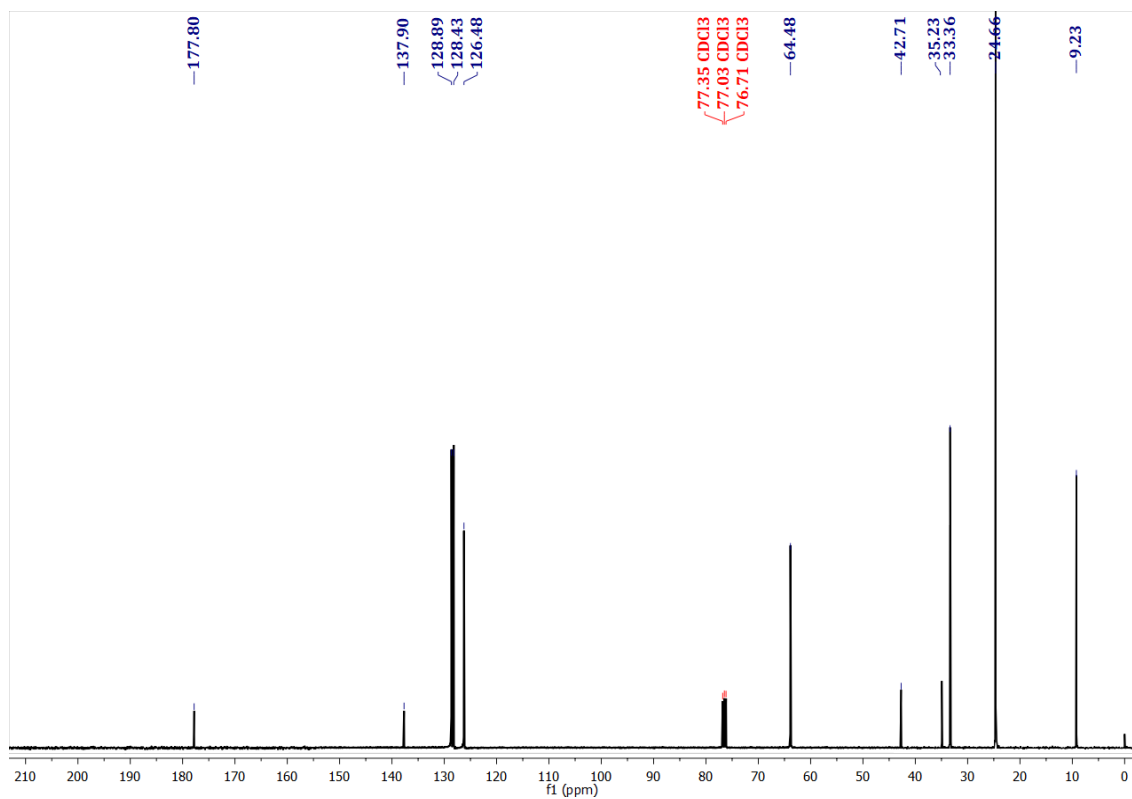

**Figure S54.** <sup>13</sup>C NMR spectrum of phenethyl 2,2-dimethylbutanoate (**3b**) recorded in CDCl<sub>3</sub>

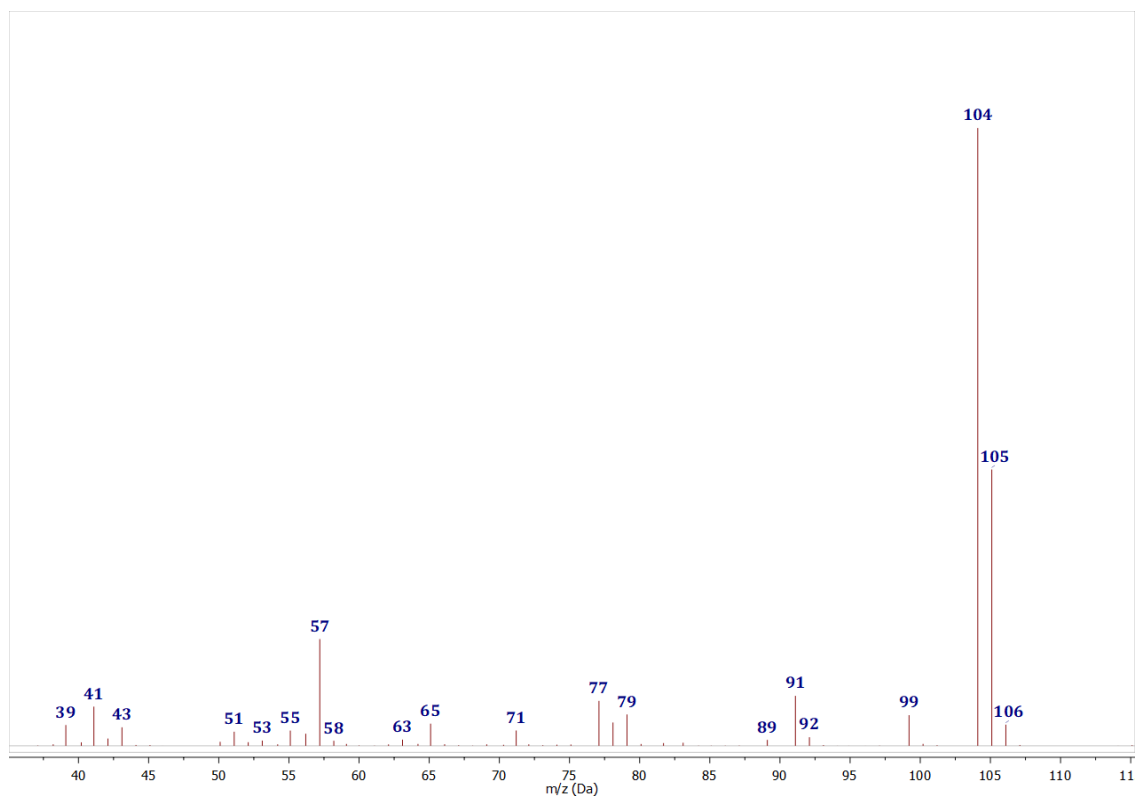

**Figure S55.** Mass spectrum of phenethyl 3,3-dimethylbutanoate (**3c**)

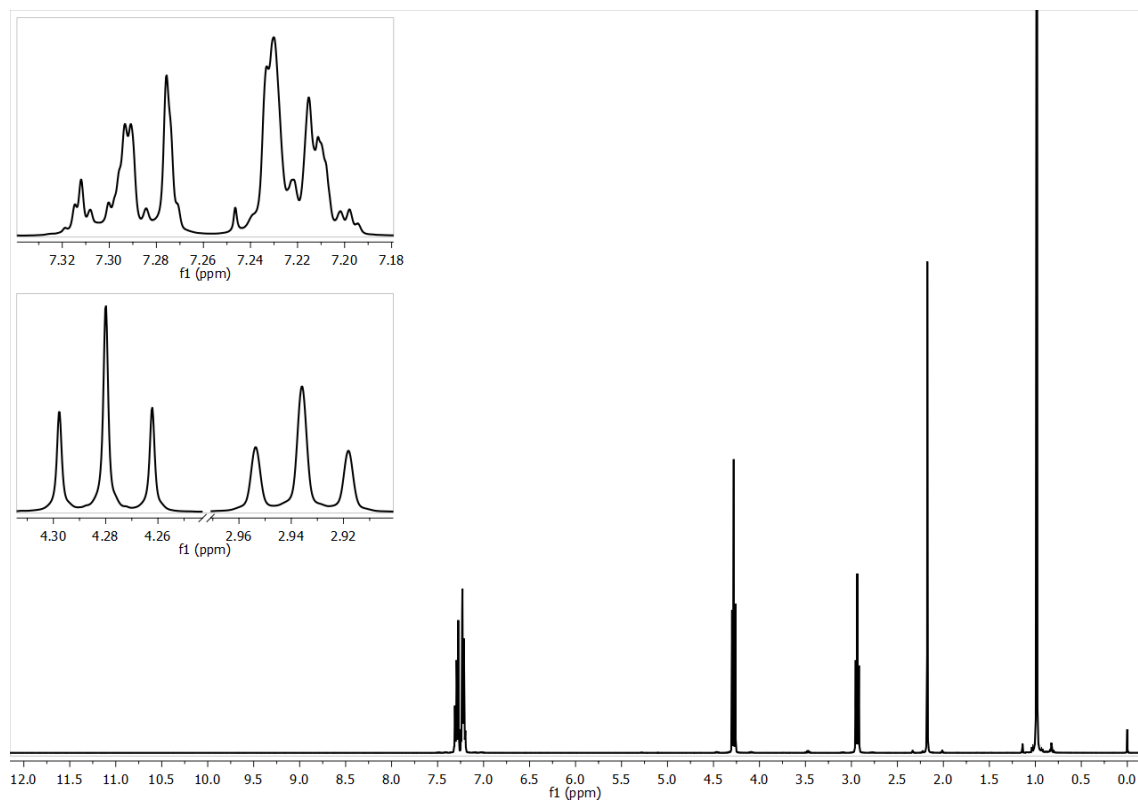

**Figure S56.**  $^1\text{H}$  NMR spectrum of phenethyl 3,3-dimethylbutanoate (**3c**) recorded in  $\text{CDCl}_3$

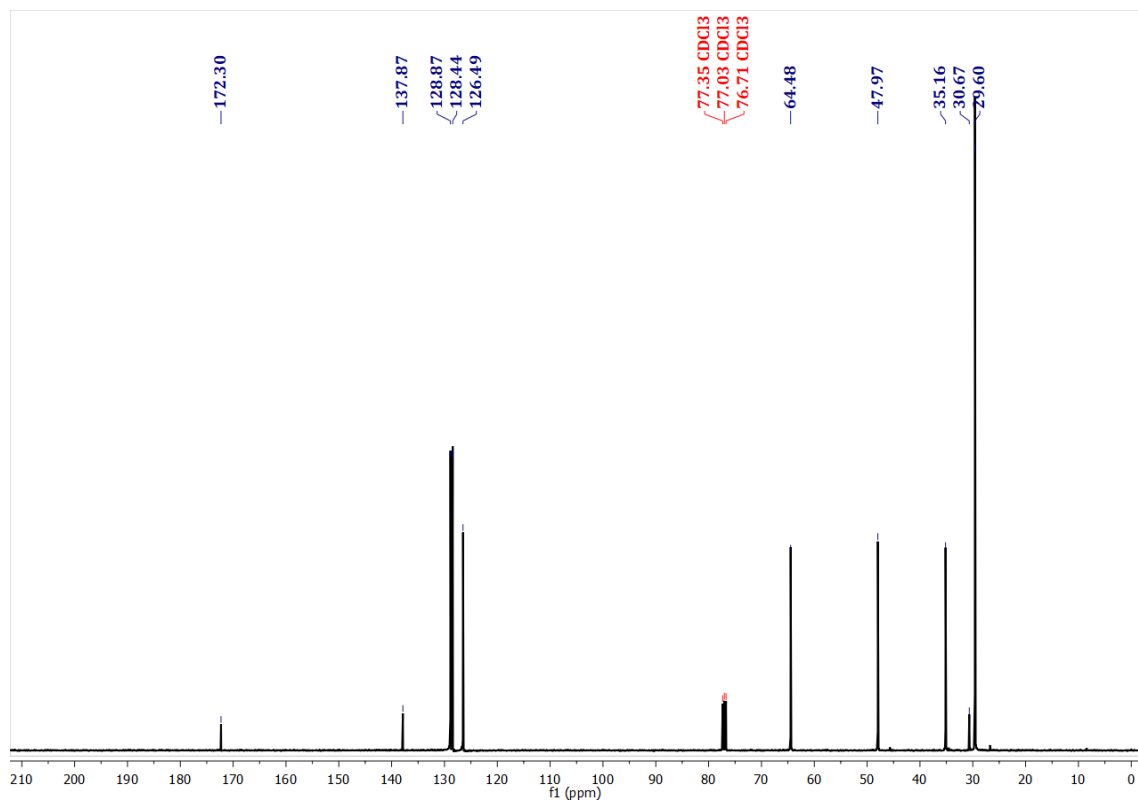

**Figure S57.**  $^{13}\text{C}$  NMR spectrum of phenethyl 3,3-dimethylbutanoate (**3c**) recorded in  $\text{CDCl}_3$

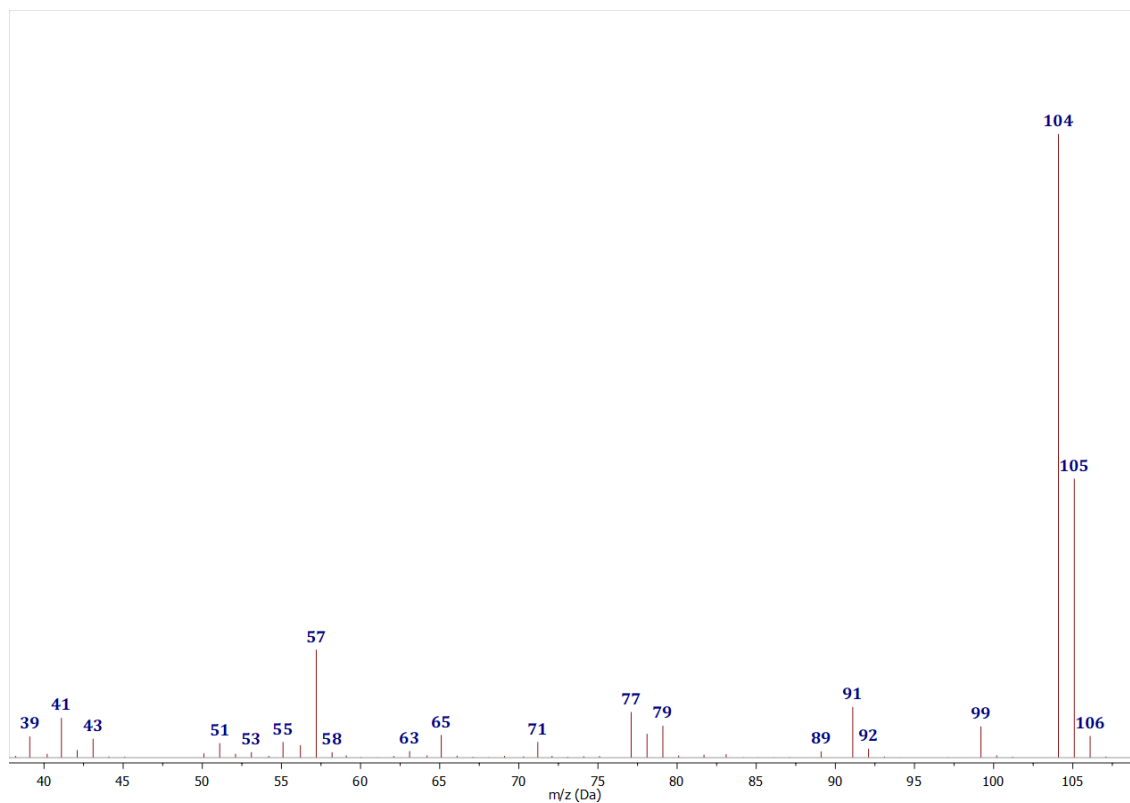

**Figure S58.** Mass spectrum of phenethyl 2,3-dimethylbutanoate (**3d**)

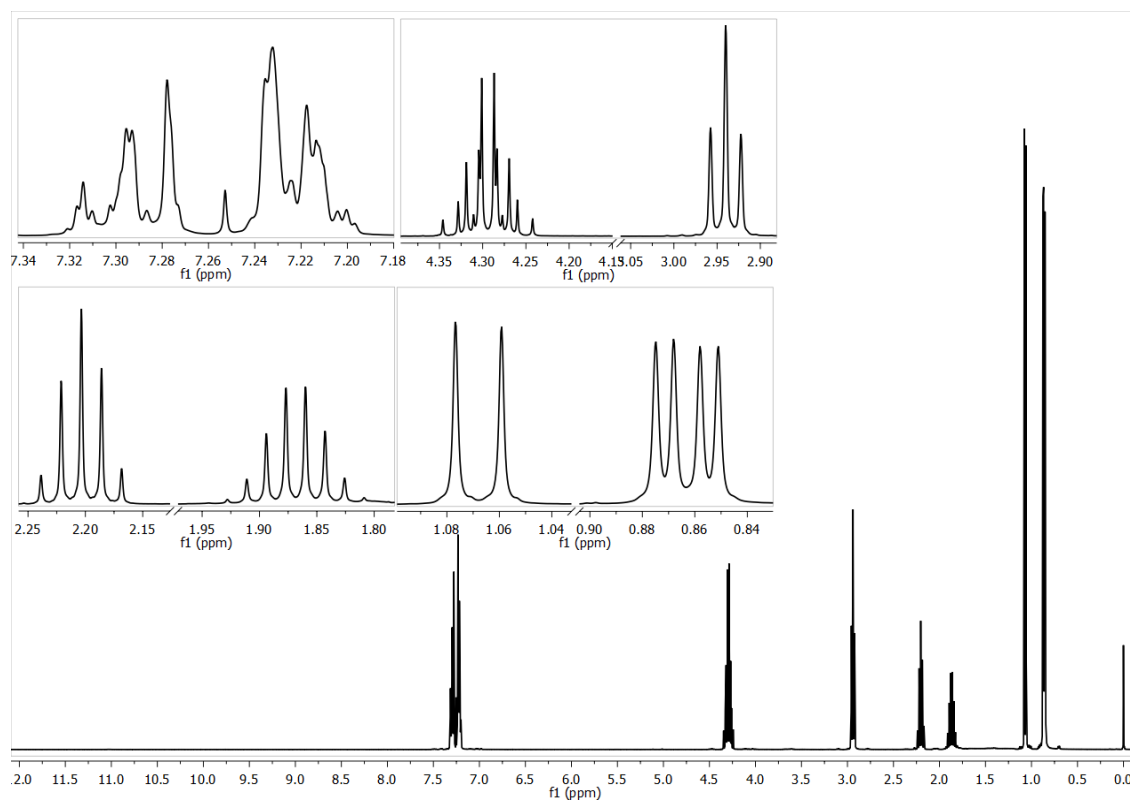

**Figure S59.**  $^1\text{H}$  NMR spectrum of phenethyl 2,3-dimethylbutanoate (**3d**) recorded in  $\text{CDCl}_3$

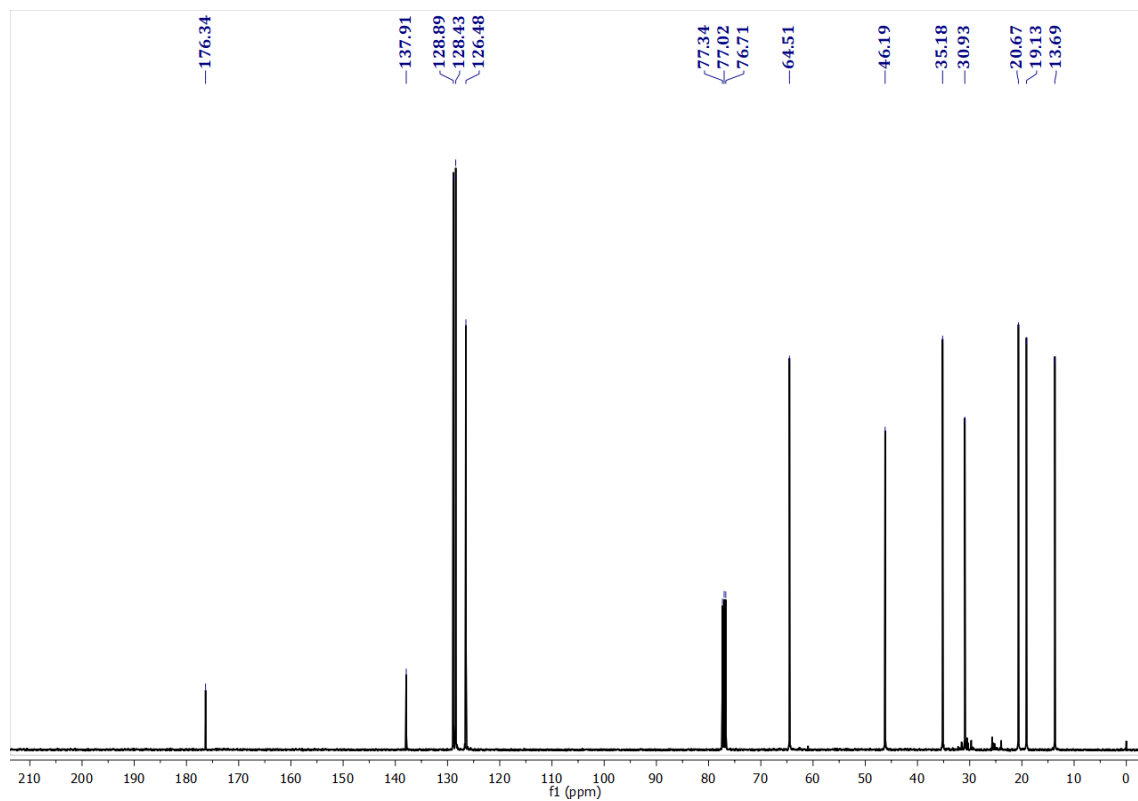

**Figure S60.** <sup>13</sup>C NMR spectrum of phenethyl 2,3-dimethylbutanoate (**3d**) recorded in CDCl<sub>3</sub>

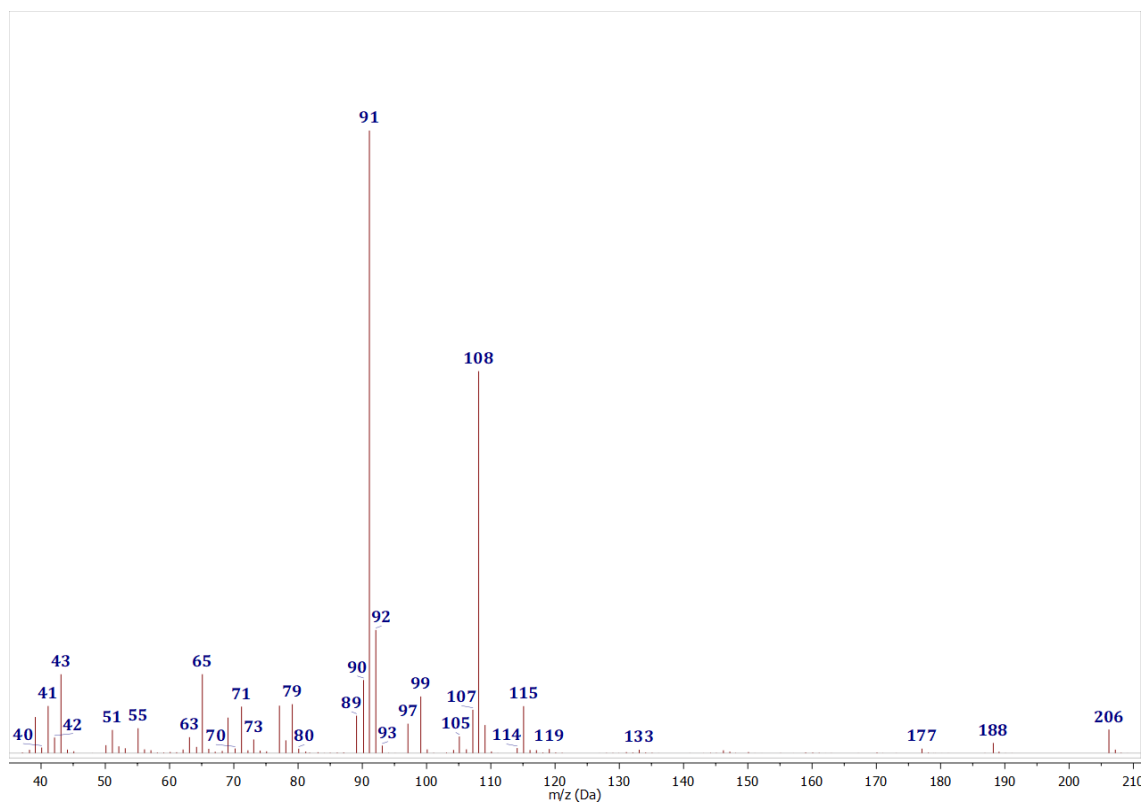

**Figure S61.** Mass spectrum of phenethyl 2-methylpentanoate (**3e**)

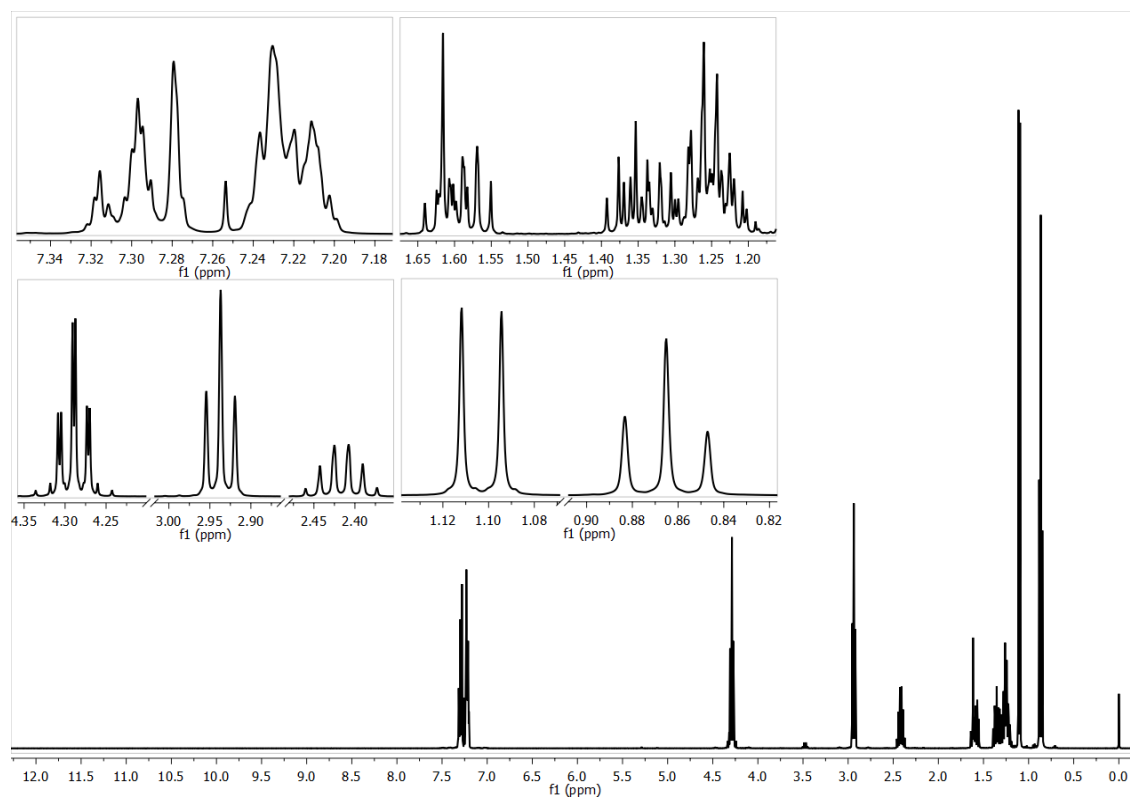

**Figure S62.**  $^1\text{H}$  NMR spectrum of phenethyl 2-methylpentanoate (**3e**) recorded in  $\text{CDCl}_3$

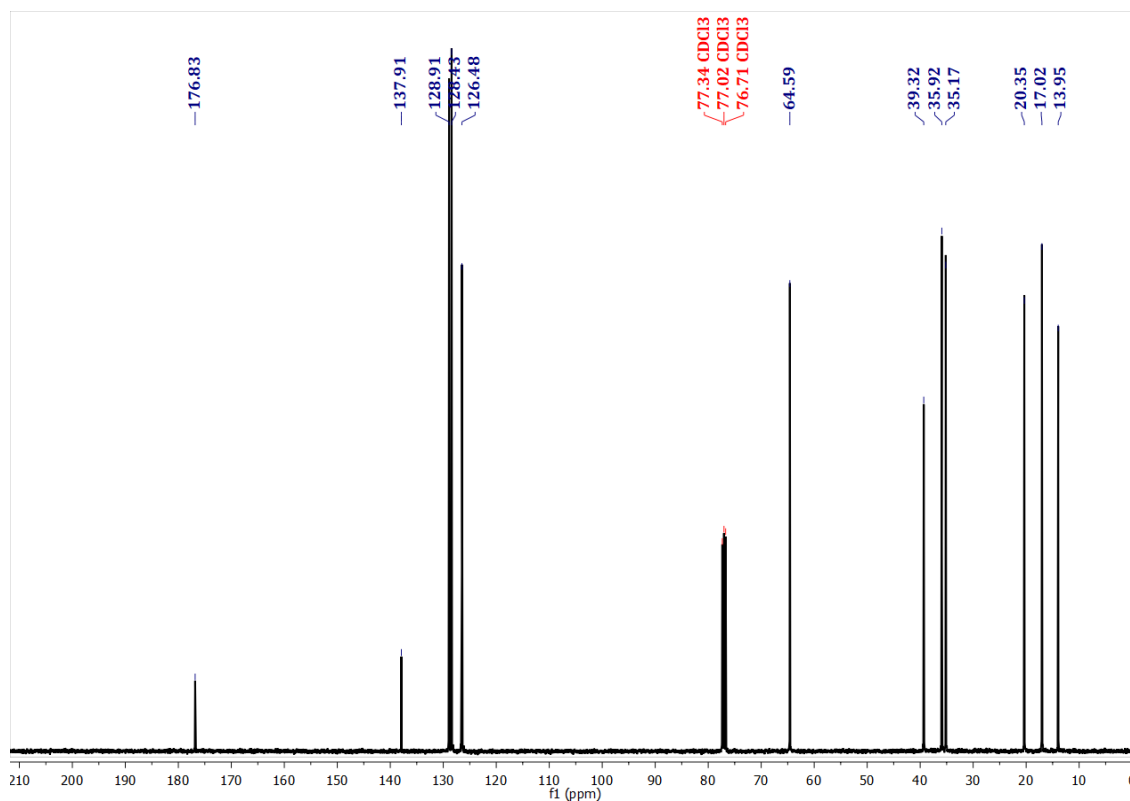

**Figure S63.**  $^{13}\text{C}$  NMR spectrum of phenethyl 2-methylpentanoate (**3e**) recorded in  $\text{CDCl}_3$

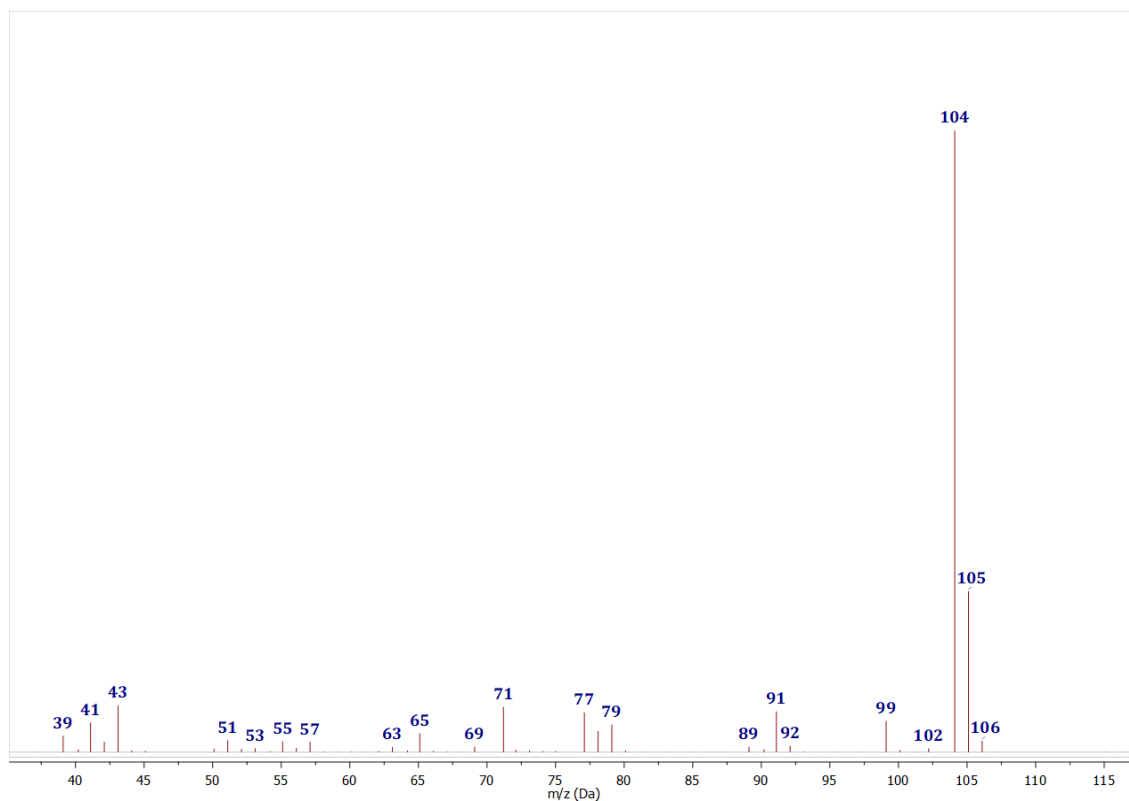

**Figure S64.** Mass spectrum of phenethyl 3-methylpentanoate (**3f**)

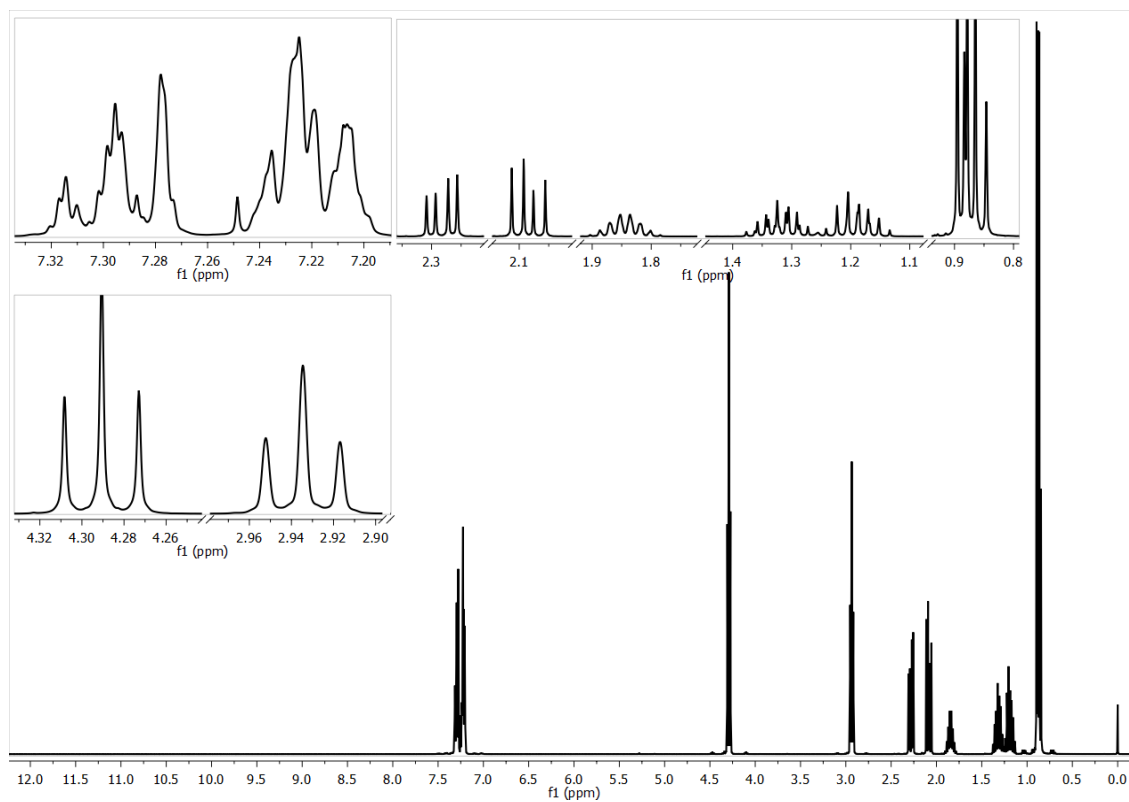

**Figure S65.**  $^1\text{H}$  NMR spectrum of phenethyl 3-methylpentanoate (**3f**) recorded in  $\text{CDCl}_3$



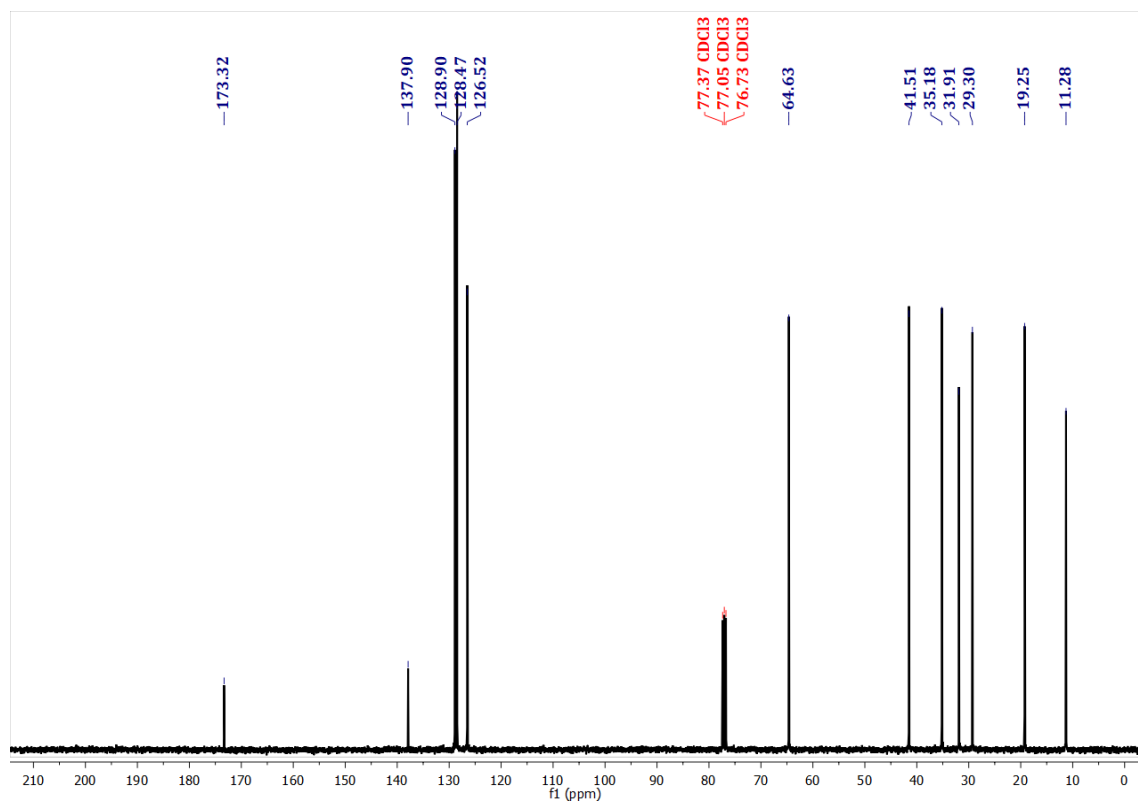

**Figure S66.** <sup>13</sup>C NMR spectrum of phenethyl 3-methylpentanoate (**3f**) recorded in CDCl<sub>3</sub>

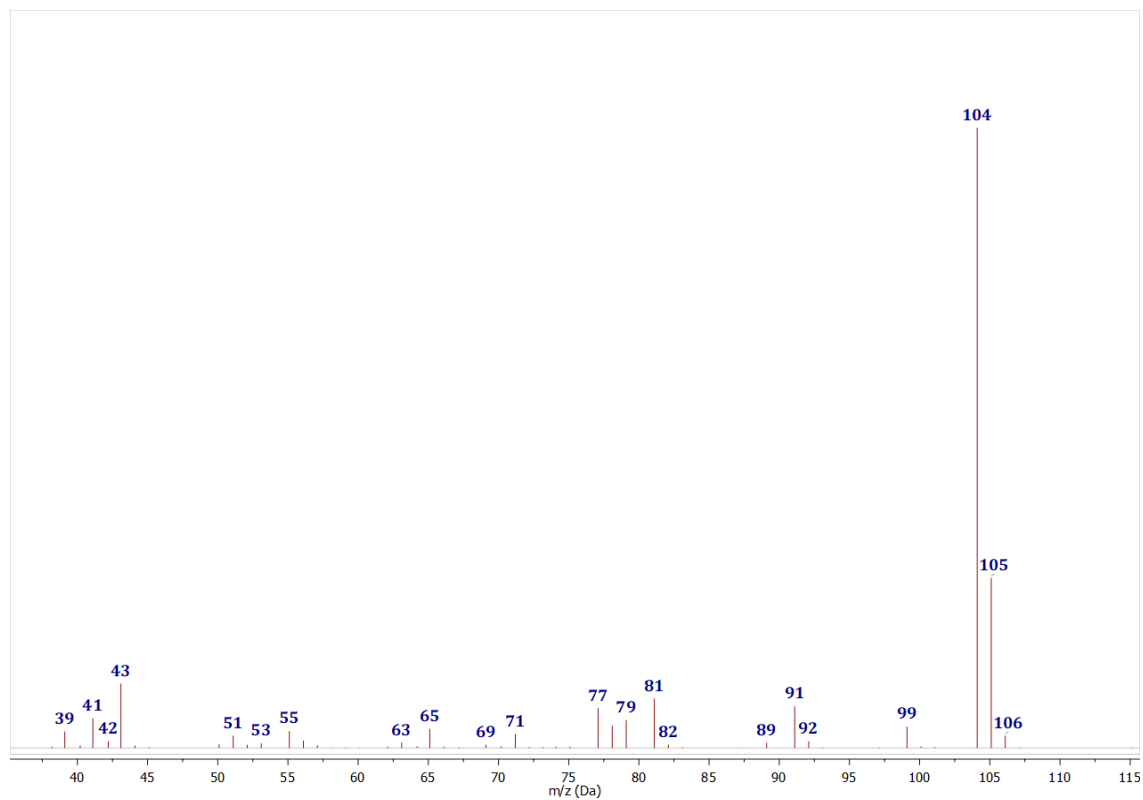

**Figure S67.** Mass spectrum of phenethyl 4-methylpentanoate (**3g**)

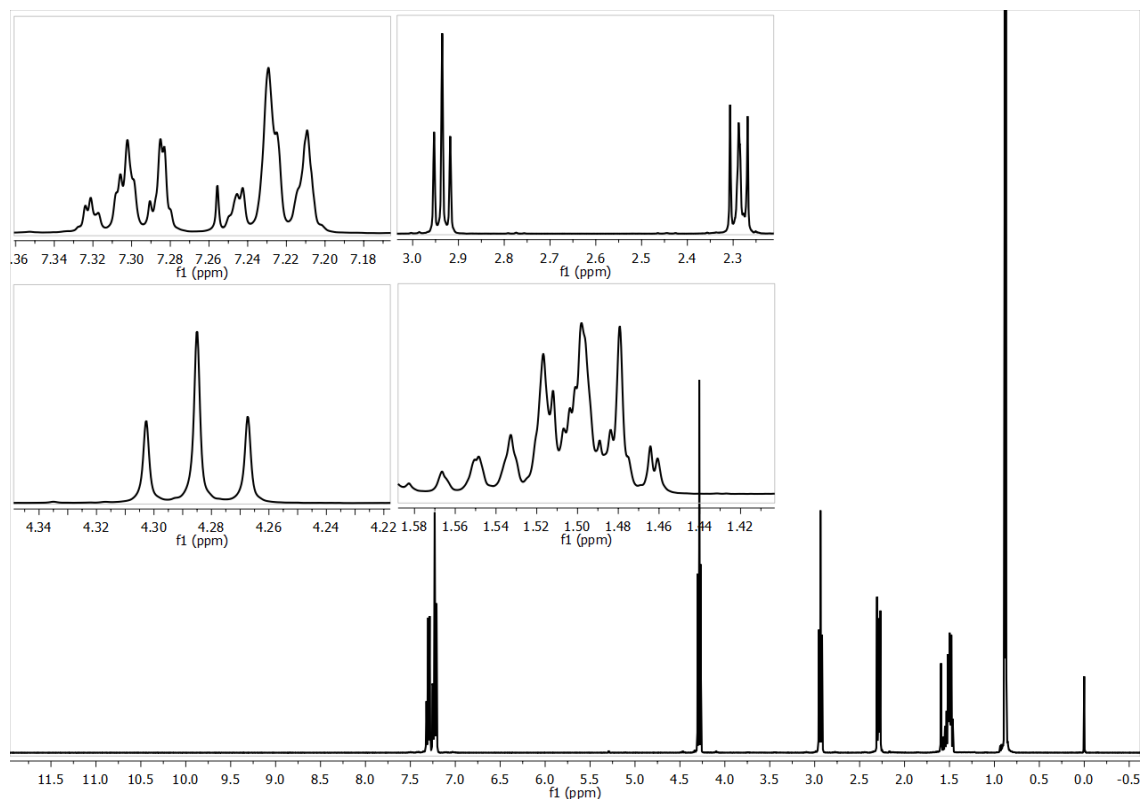

**Figure S68.**  $^1\text{H}$  NMR spectrum of phenethyl 4-methylpentanoate (**3g**) recorded in  $\text{CDCl}_3$

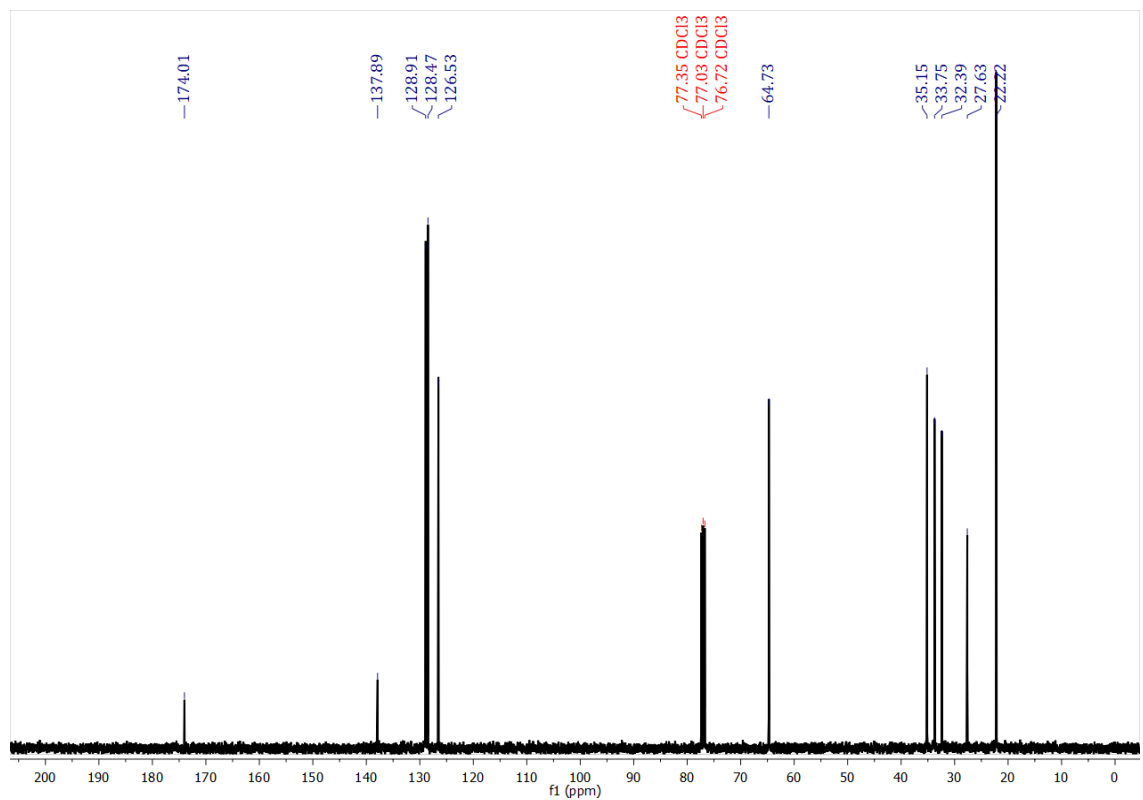

**Figure S69.**  $^{13}\text{C}$  NMR spectrum of phenethyl 4-methylpentanoate (**3g**) recorded in  $\text{CDCl}_3$

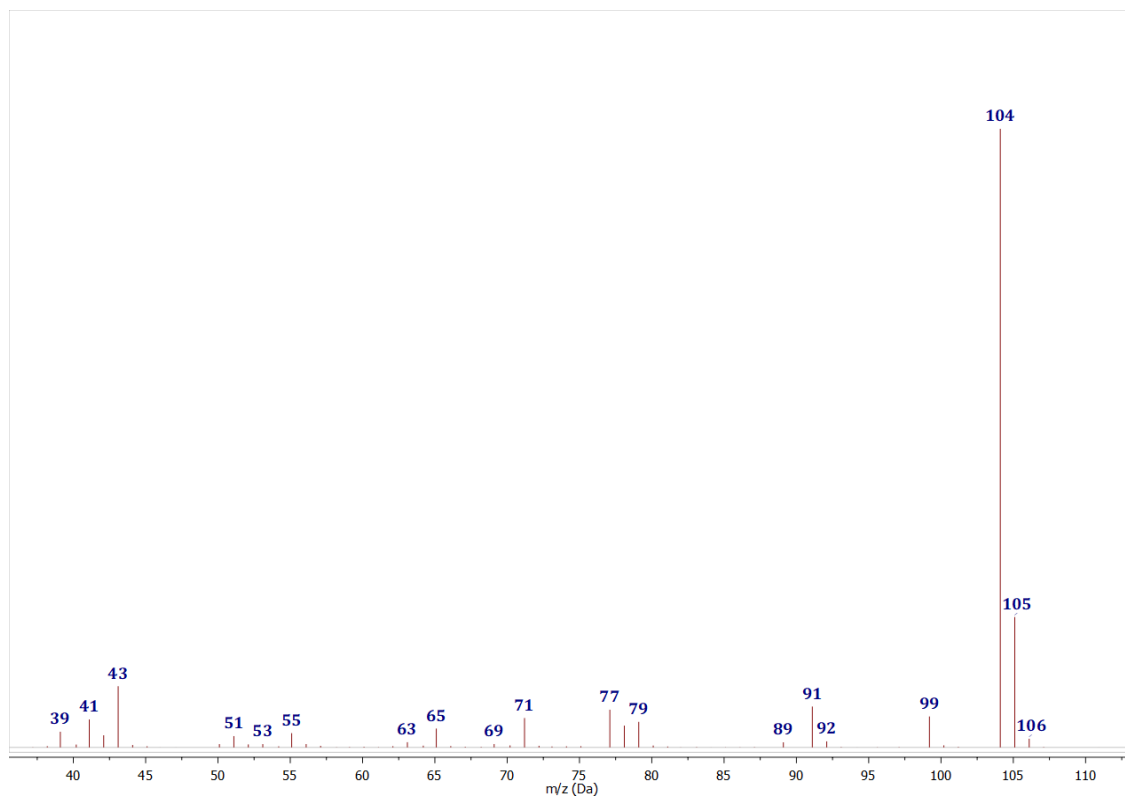

**Figure S70.** Mass spectrum of phenethyl hexanoate (**3h**)

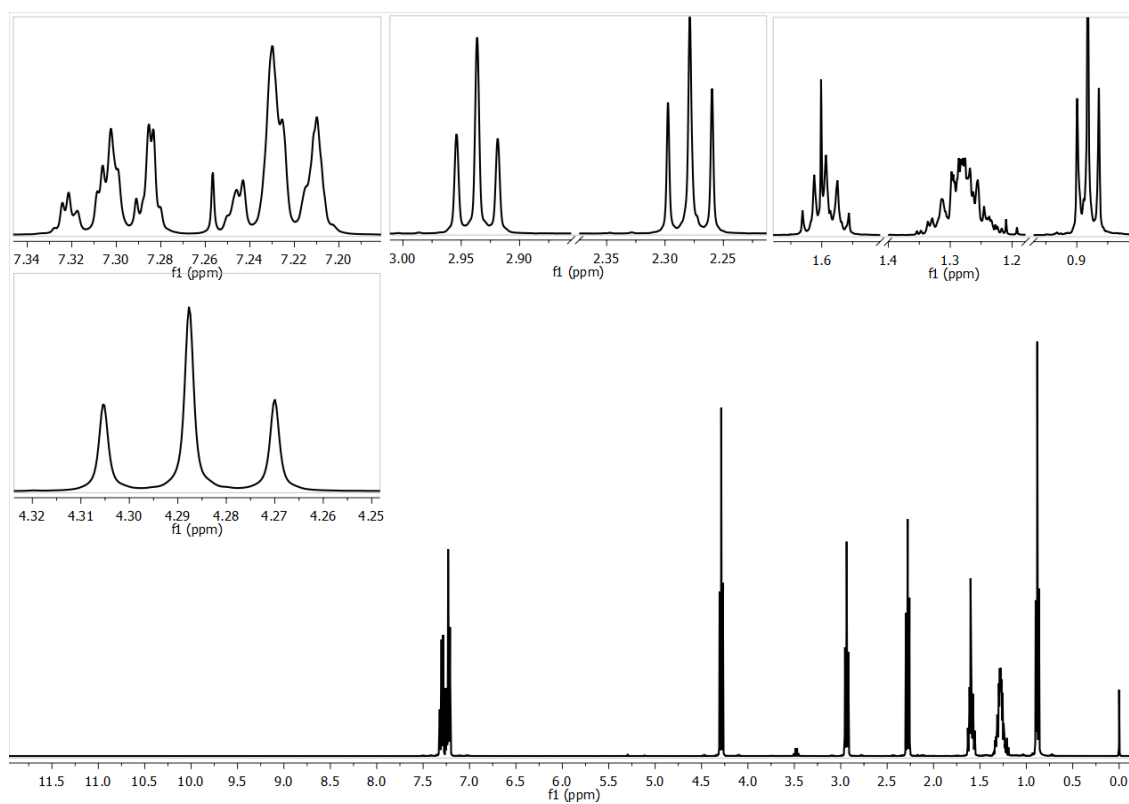

**Figure S71.**  $^1\text{H}$  NMR spectrum of phenethyl hexanoate (**3h**) recorded in  $\text{CDCl}_3$

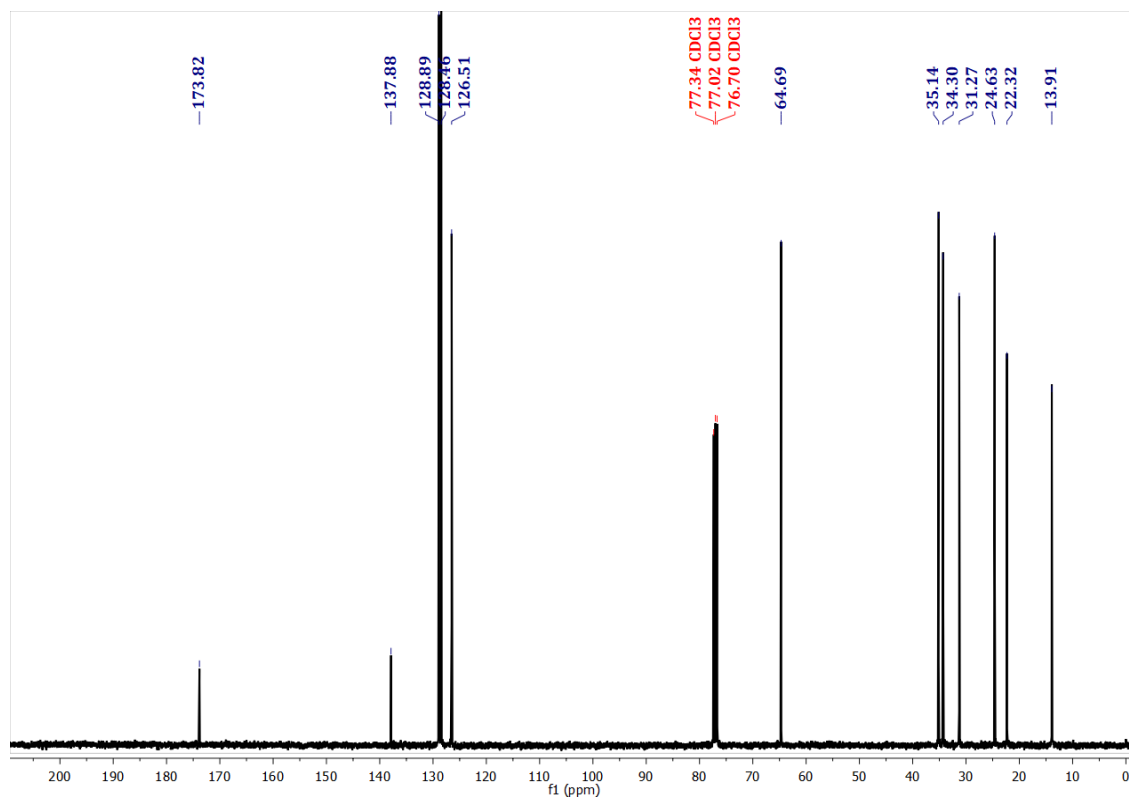

**Figure S72.** <sup>13</sup>C NMR spectrum of phenethyl hexanoate (**3h**) recorded in CDCl<sub>3</sub>

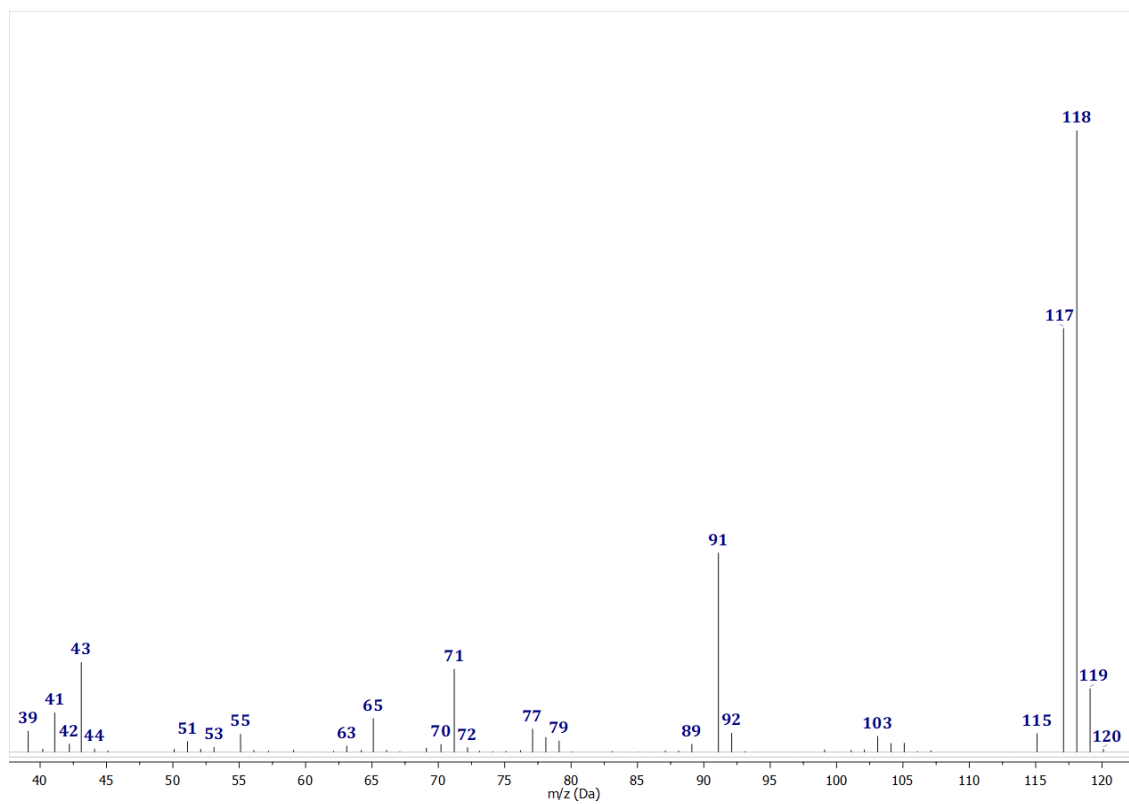

**Figure S73.** Mass spectrum of 3-phenylpropyl 2-ethylbutanoate (**4a**)

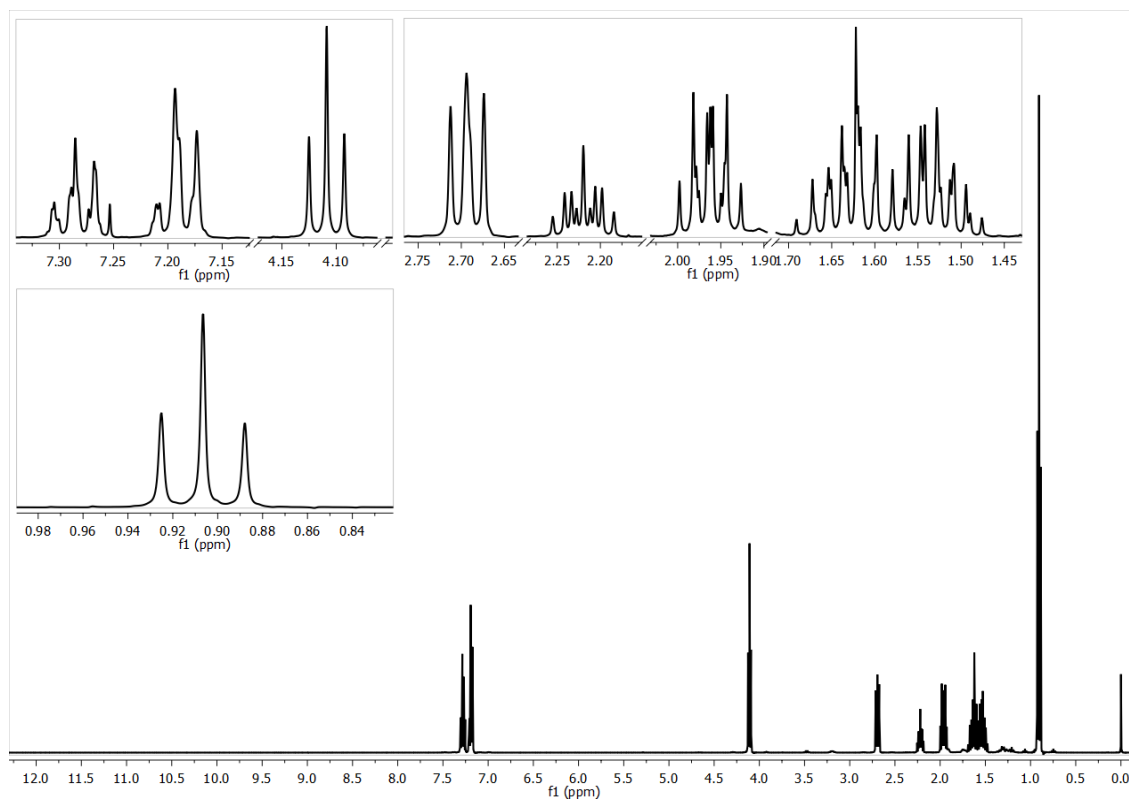

**Figure S74.**  $^1\text{H}$  NMR spectrum of 3-phenylpropyl 2-ethylbutanoate (**4a**) recorded in  $\text{CDCl}_3$

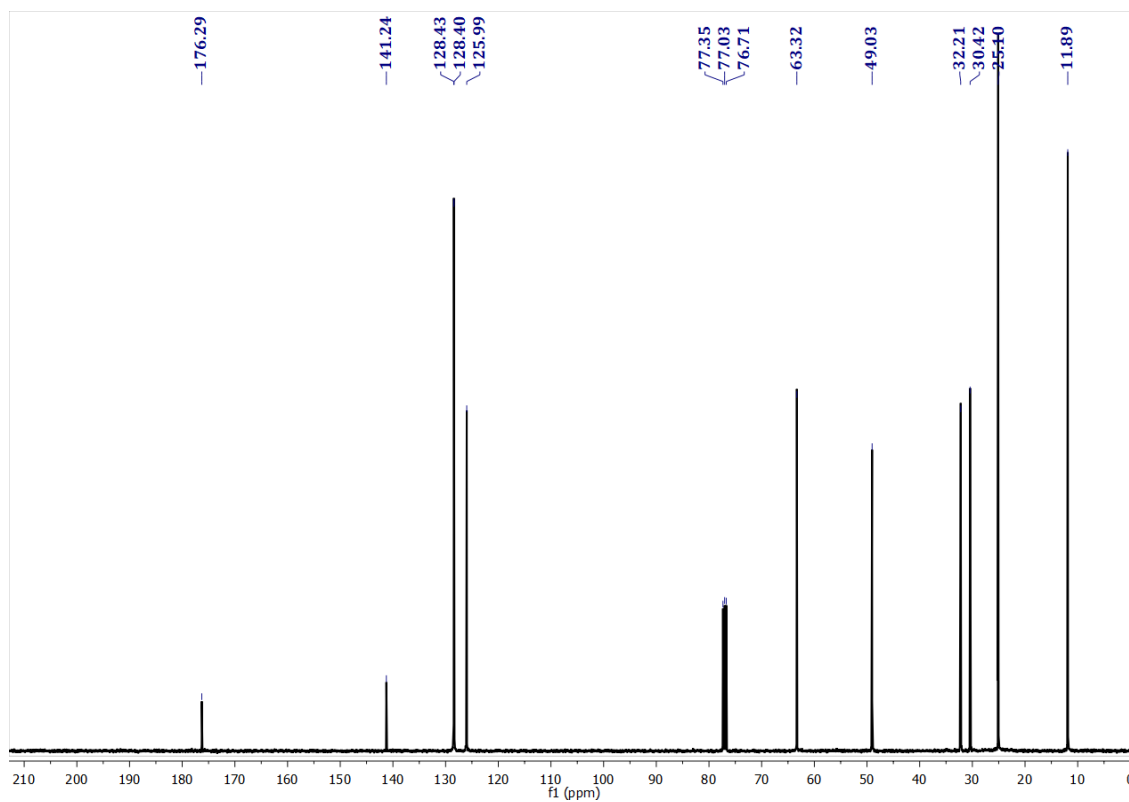

**Figure S75.**  $^{13}\text{C}$  NMR spectrum of 3-phenylpropyl 2-ethylbutanoate (**4a**) recorded in  $\text{CDCl}_3$

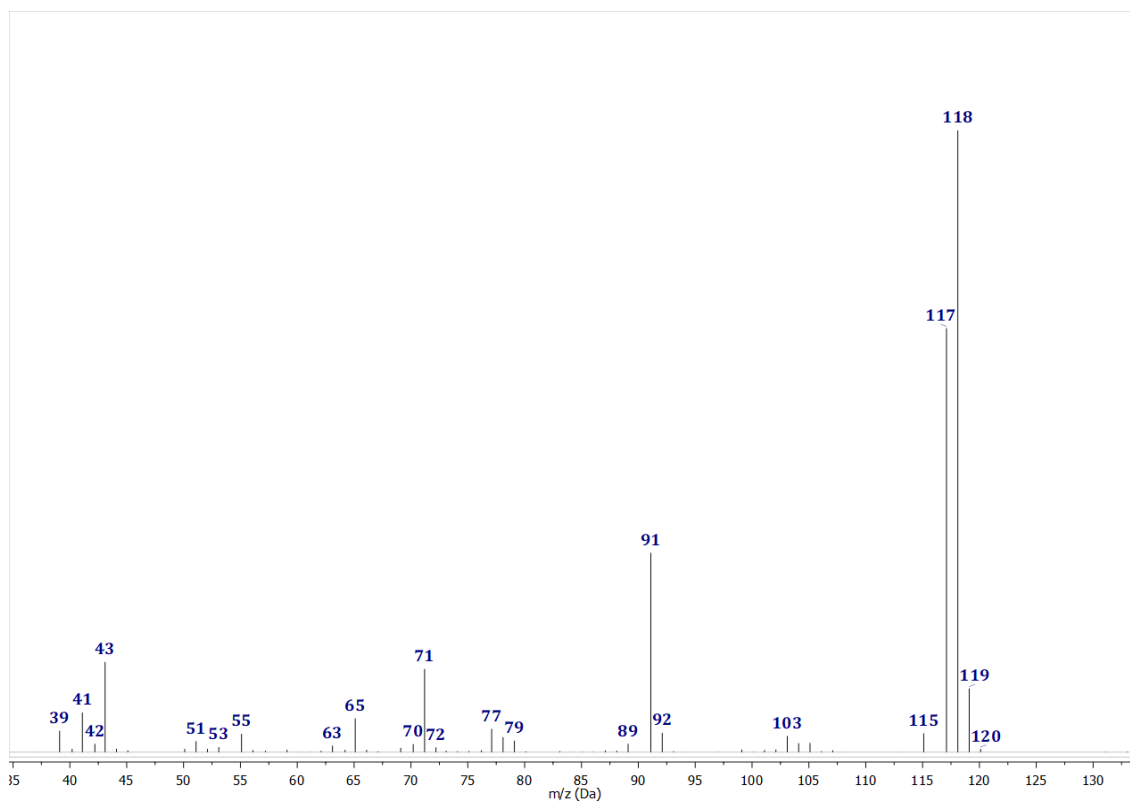

**Figure S76.** Mass spectrum of 3-phenylpropyl 2,2-dimethylbutanoate (**4b**)

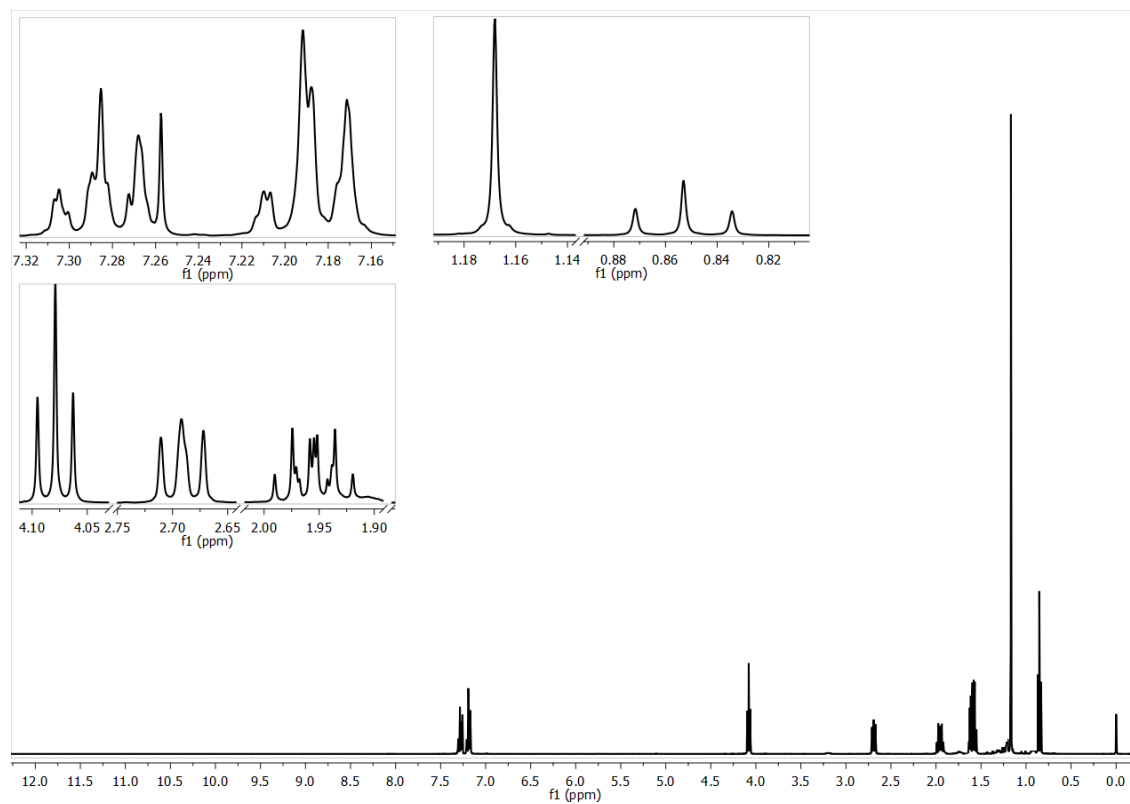

**Figure S77.**  $^1\text{H}$  NMR spectrum of 3-phenylpropyl 2,2-dimethylbutanoate (**4b**) recorded in  $\text{CDCl}_3$

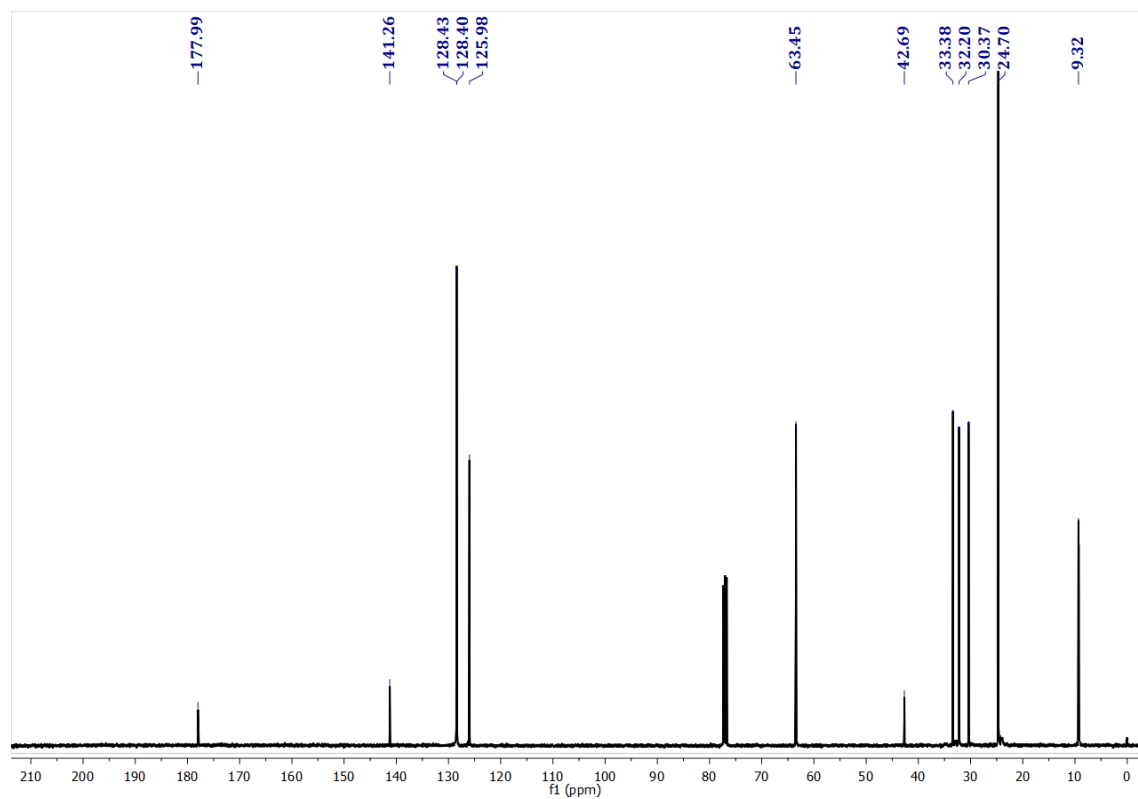

**Figure S78.** <sup>13</sup>C NMR spectrum of 3-phenylpropyl 2,2-dimethylbutanoate (**4b**) recorded in CDCl<sub>3</sub>

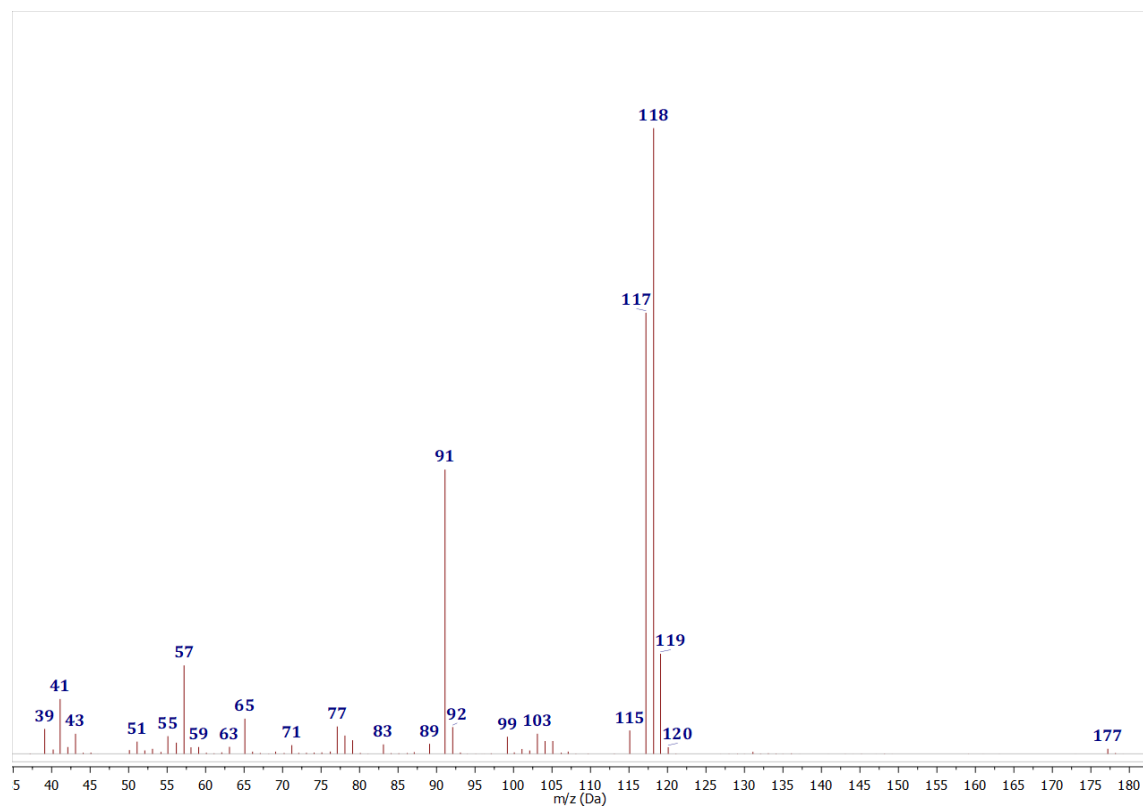

**Figure S79.** Mass spectrum of 3-phenylpropyl 3,3-dimethylbutanoate (**4c**)

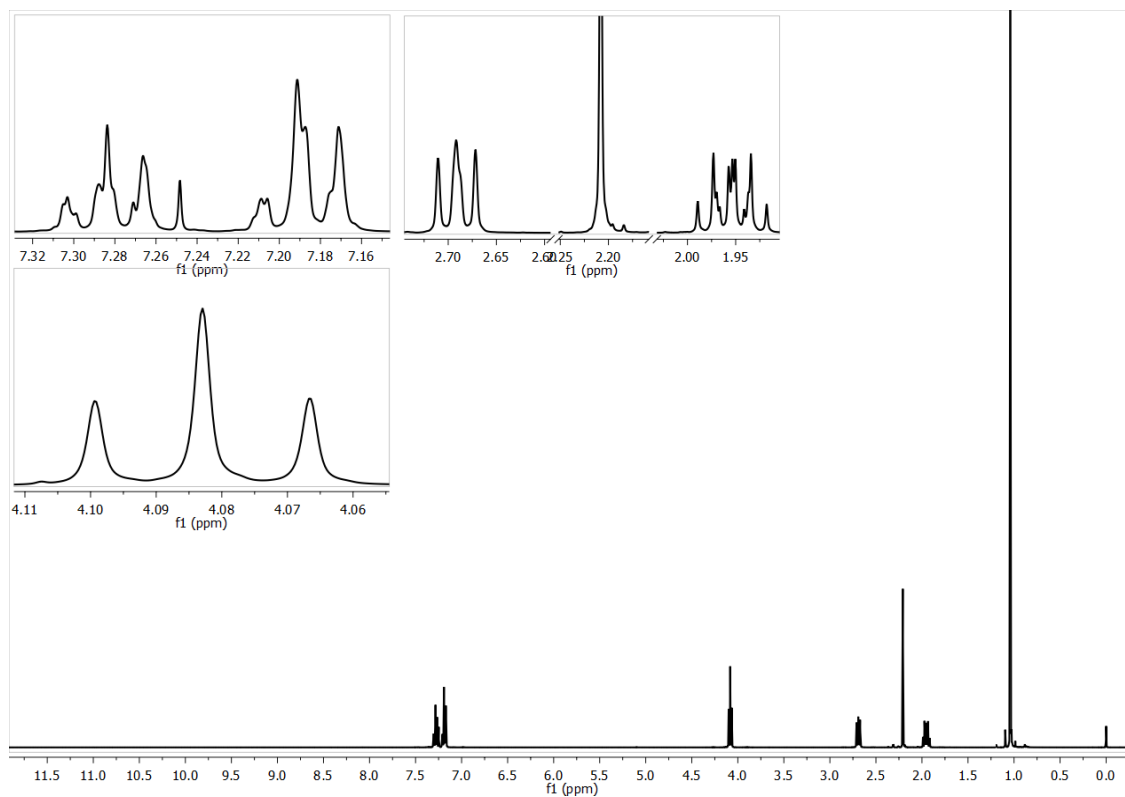

**Figure S80.**  $^1\text{H}$  NMR spectrum of 3-phenylpropyl 3,3-dimethylbutanoate (**4c**) recorded in  $\text{CDCl}_3$

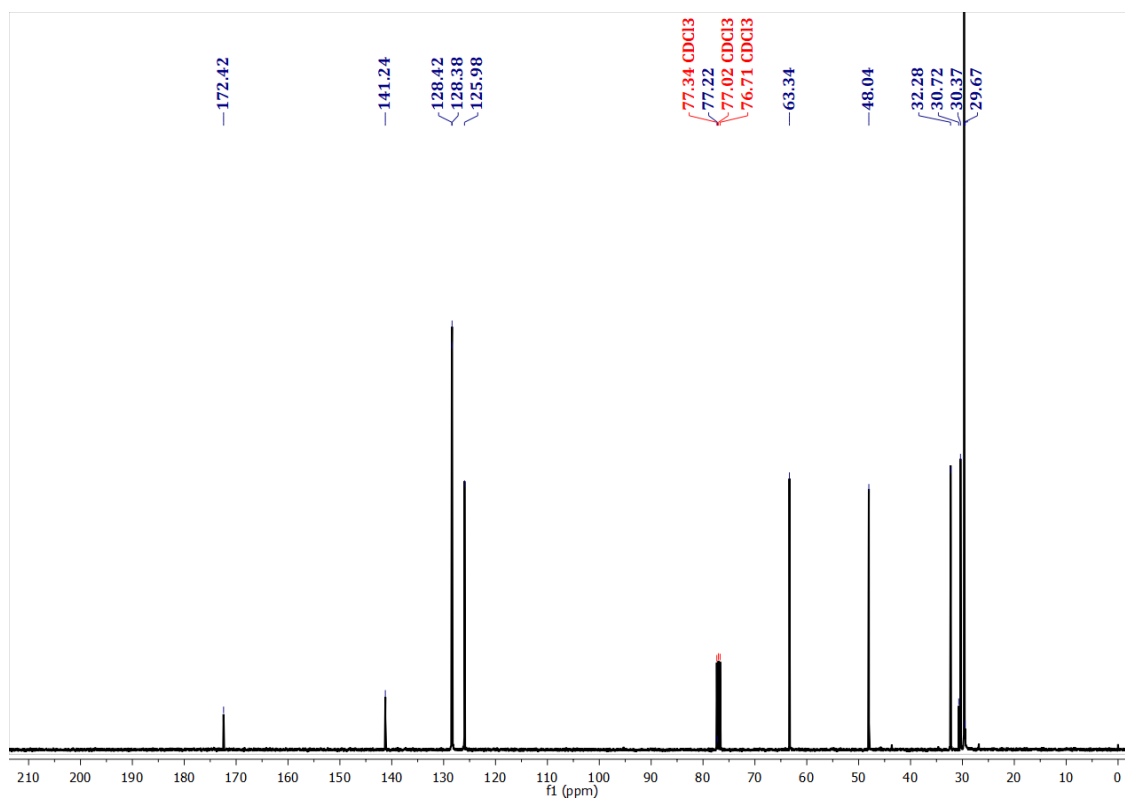

**Figure S81.**  $^{13}\text{C}$  NMR spectrum of 3-phenylpropyl 3,3-dimethylbutanoate (**4c**) recorded in  $\text{CDCl}_3$



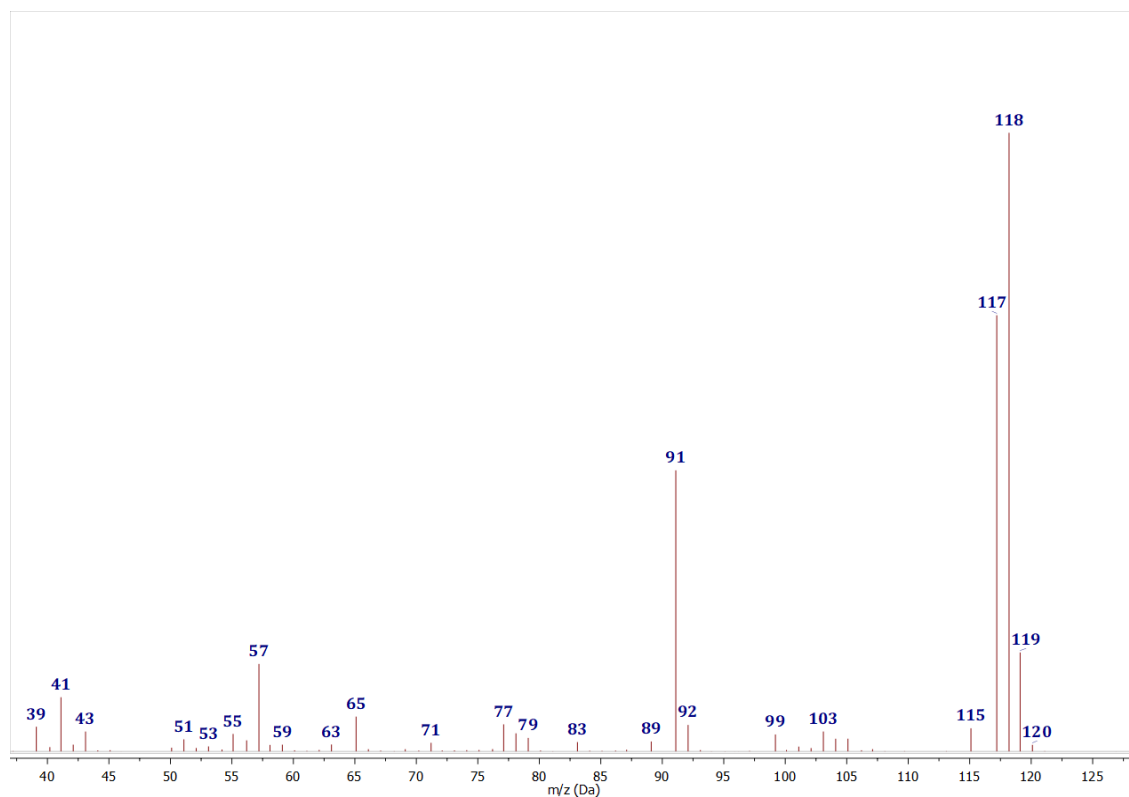

**Figure S82.** Mass spectrum of 3-phenylpropyl 2,3-dimethylbutanoate (**4d**)

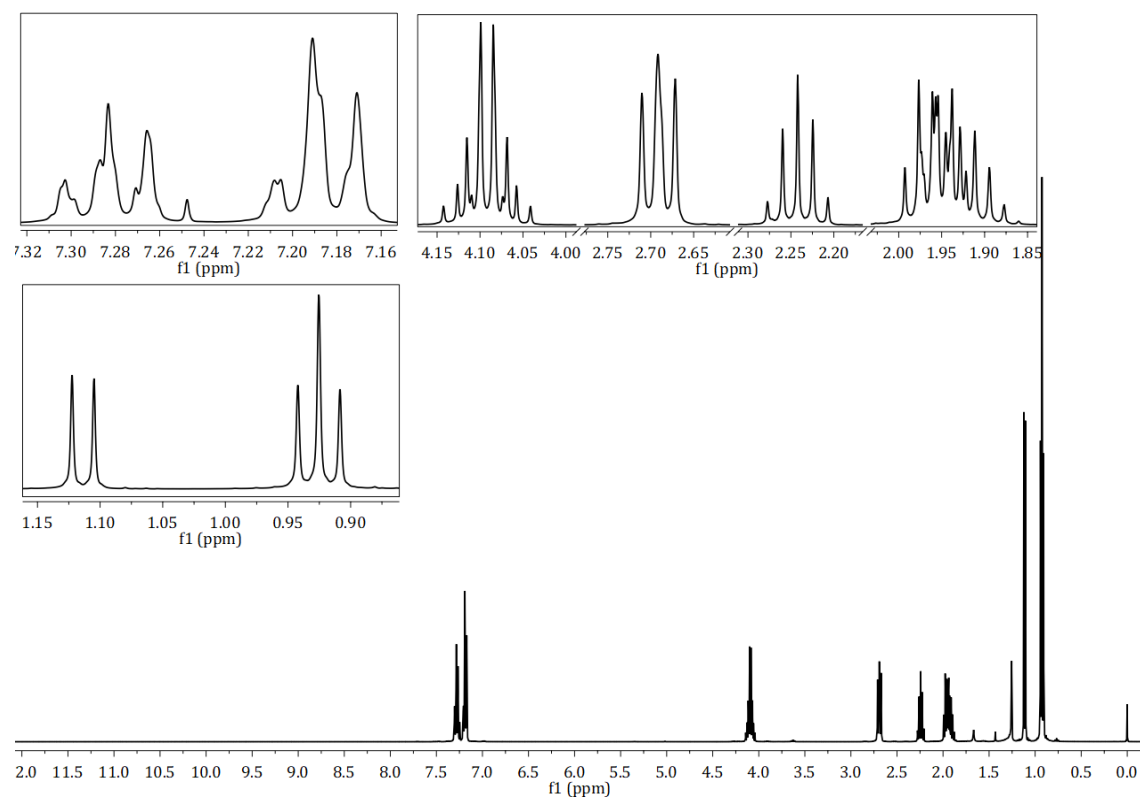

**Figure S83.**  $^1\text{H}$  NMR spectrum of 3-phenylpropyl 2,3-dimethylbutanoate (**4d**) recorded in  $\text{CDCl}_3$

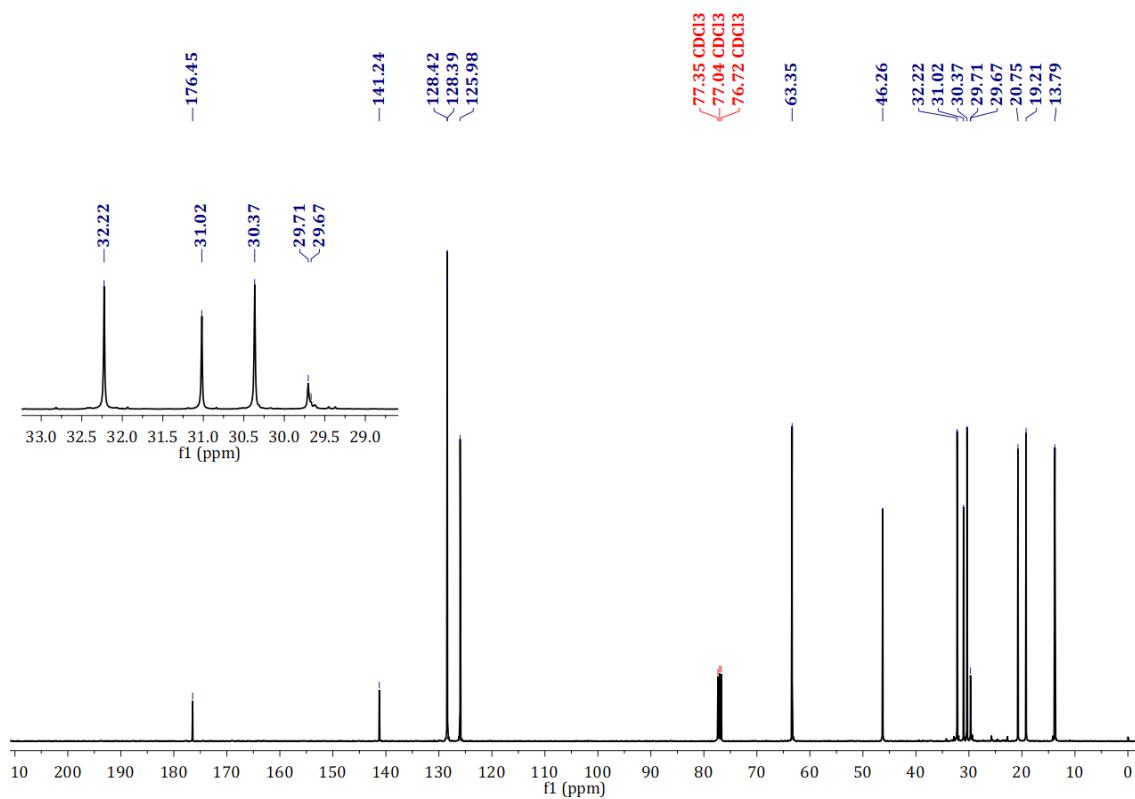

**Figure S84.** <sup>13</sup>C NMR spectrum of 3-phenylpropyl 2,3-dimethylbutanoate (**4d**) recorded in CDCl<sub>3</sub>

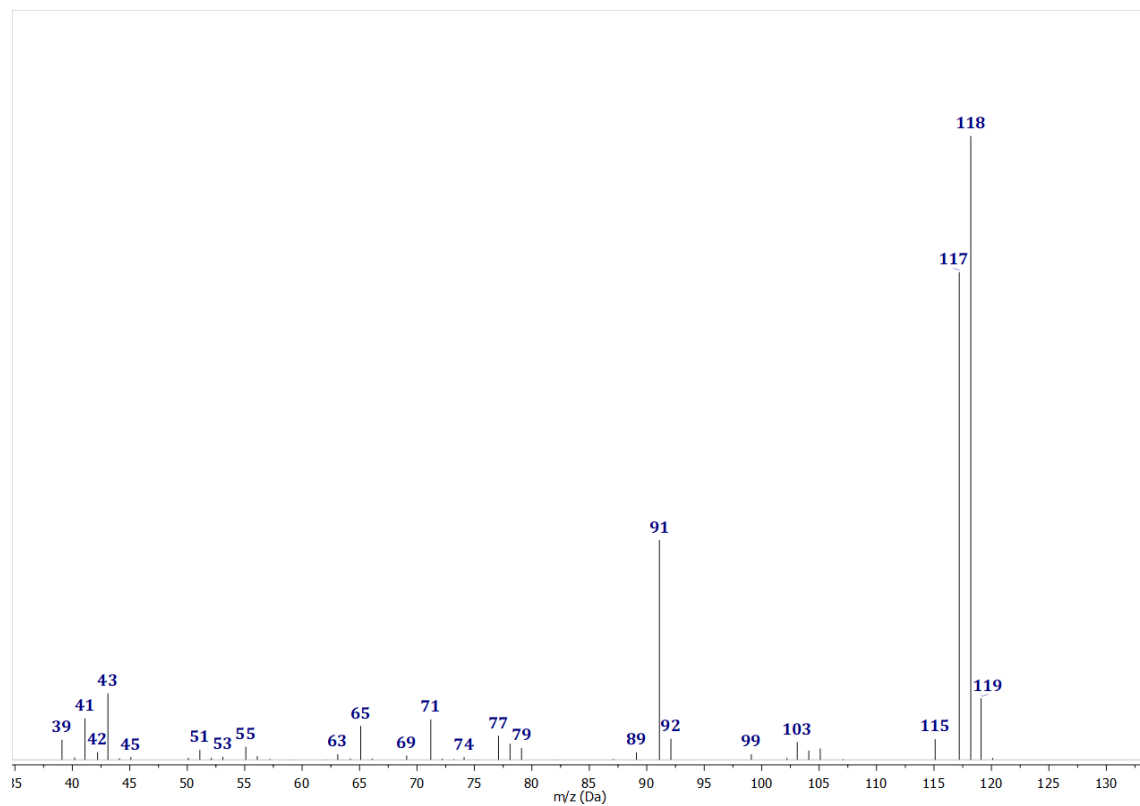

**Figure S85.** Mass spectrum of 3-phenylpropyl 2-methylpentanoate (**4e**)

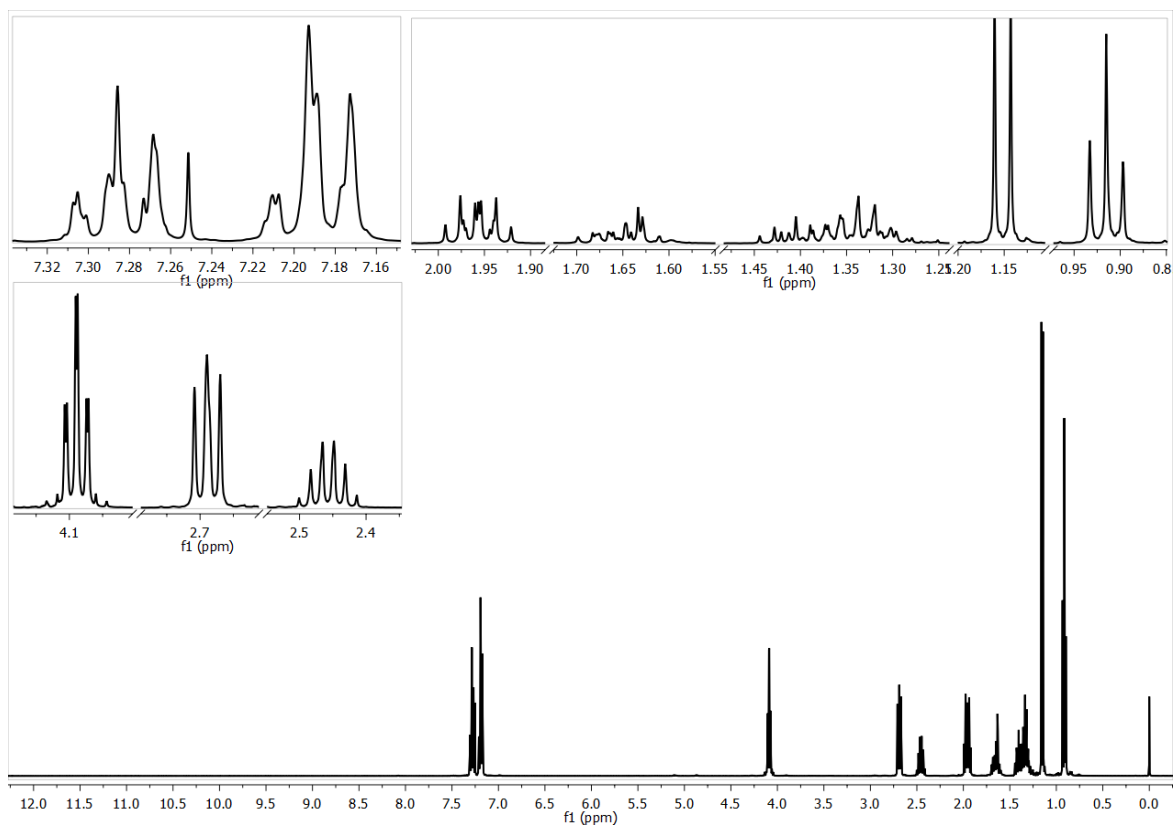

**Figure S86a.**  $^1\text{H}$  NMR spectrum of 3-phenylpropyl 2-methylpentanoate (**4e**) recorded in  $\text{CDCl}_3$

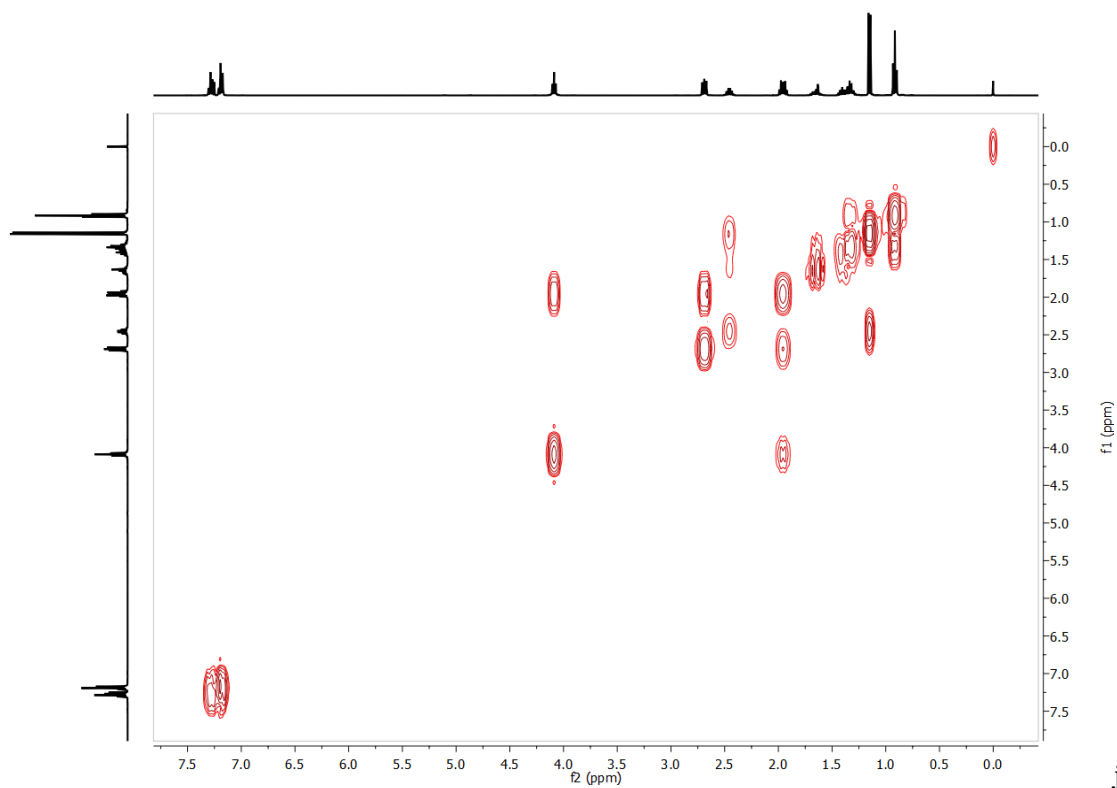

**Figure S86b.**  $^1\text{H}$  –  $^1\text{H}$  COSY spectrum of 3-phenylpropyl 2-methylpentanoate (**4e**)

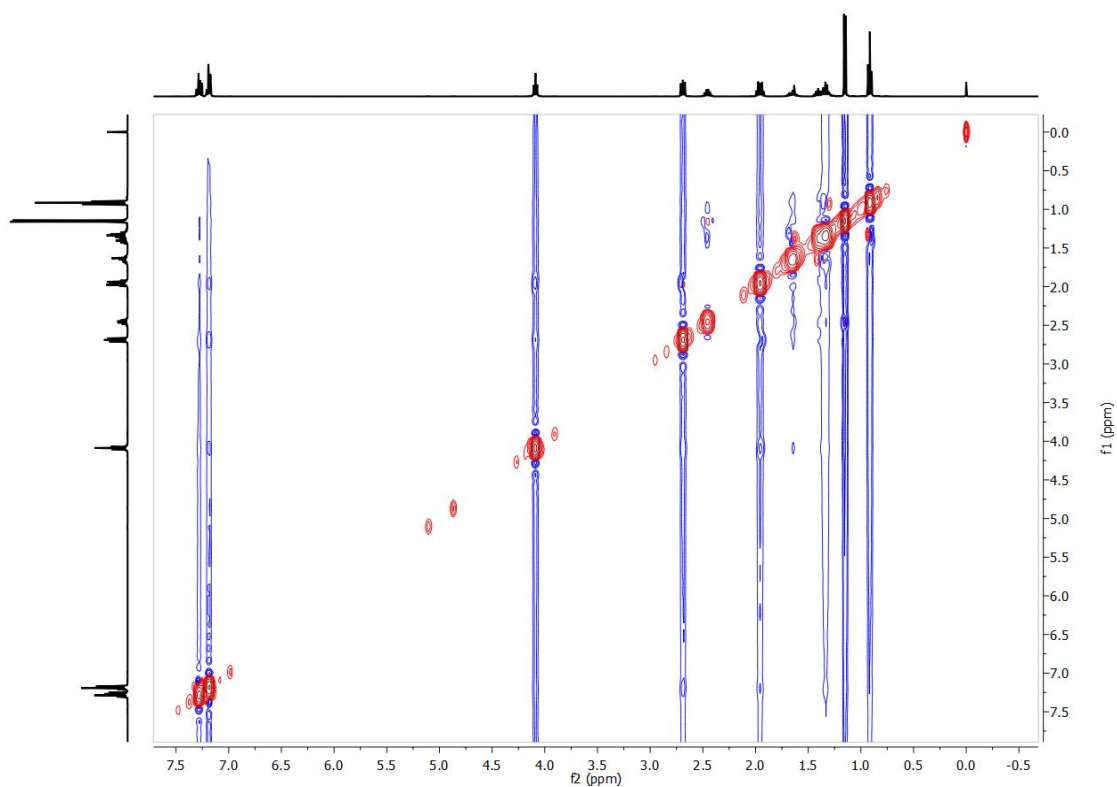

**Figure S86c.** NOESY spectrum of 3-phenylpropyl 2-methylpentanoate (**4e**)

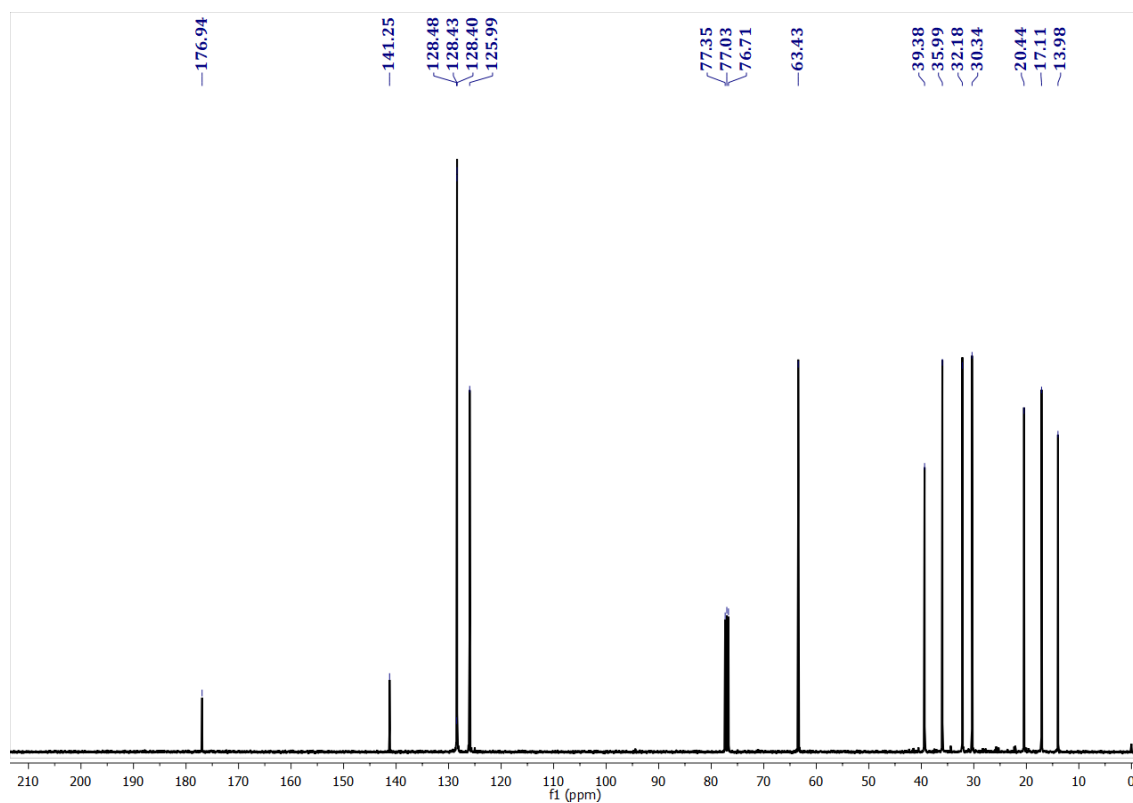

**Figure S87a.**  $^{13}\text{C}$  NMR spectrum of 3-phenylpropyl 2-methylpentanoate (**4e**) recorded in  $\text{CDCl}_3$

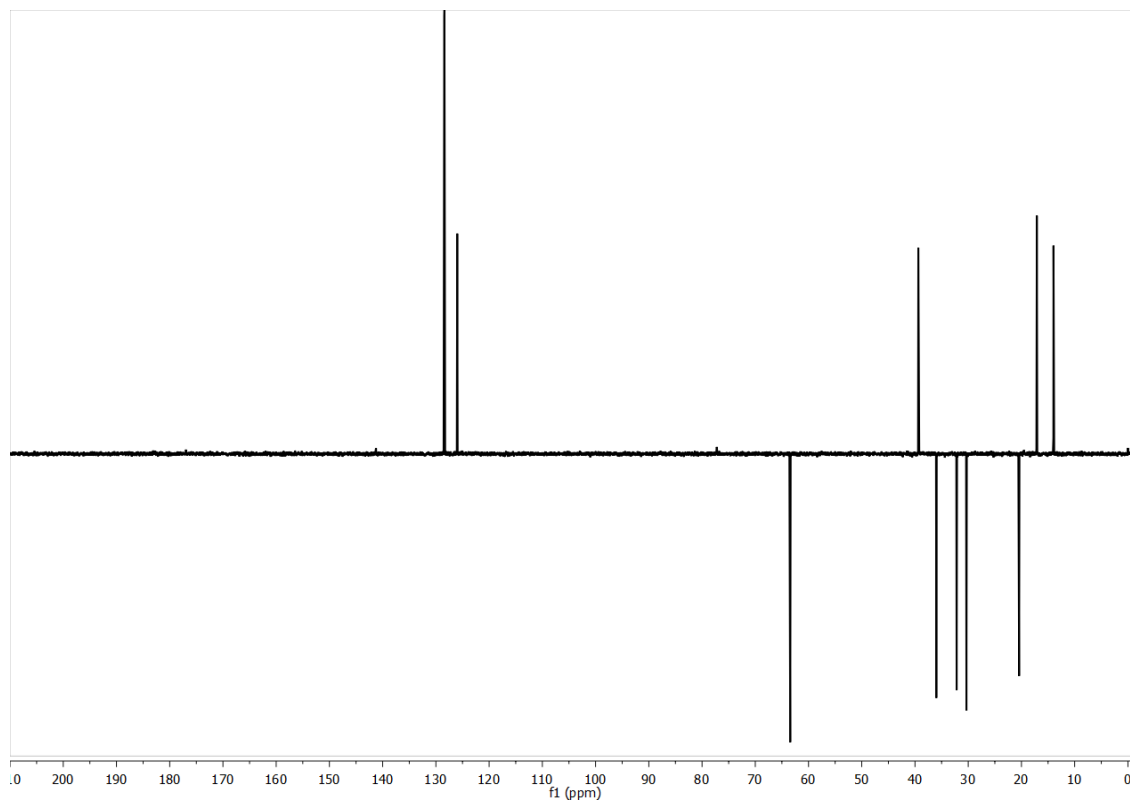

**Figure S87b.** DEPT 135 spectrum of 3-phenylpropyl 2-methylpentanoate (**4e**)

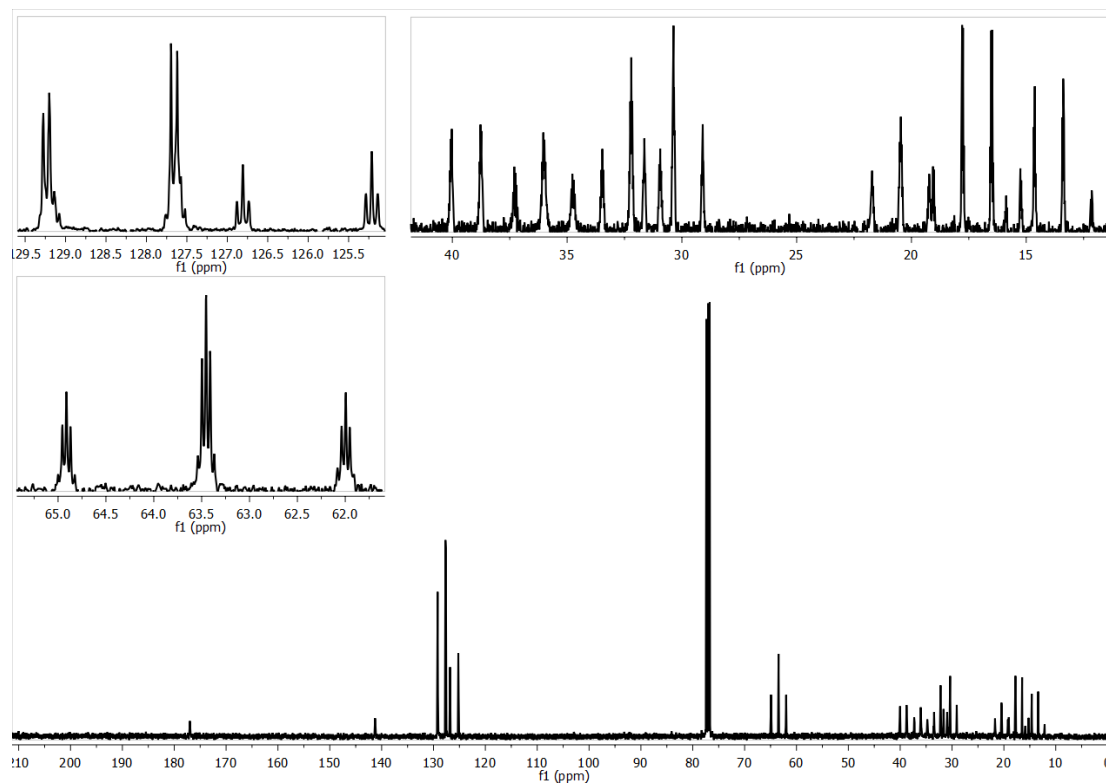

**Figure S87c.** Proton-coupled  $^{13}\text{C}$  NMR spectrum of 3-phenylpropyl 2-methylpentanoate (**4e**)

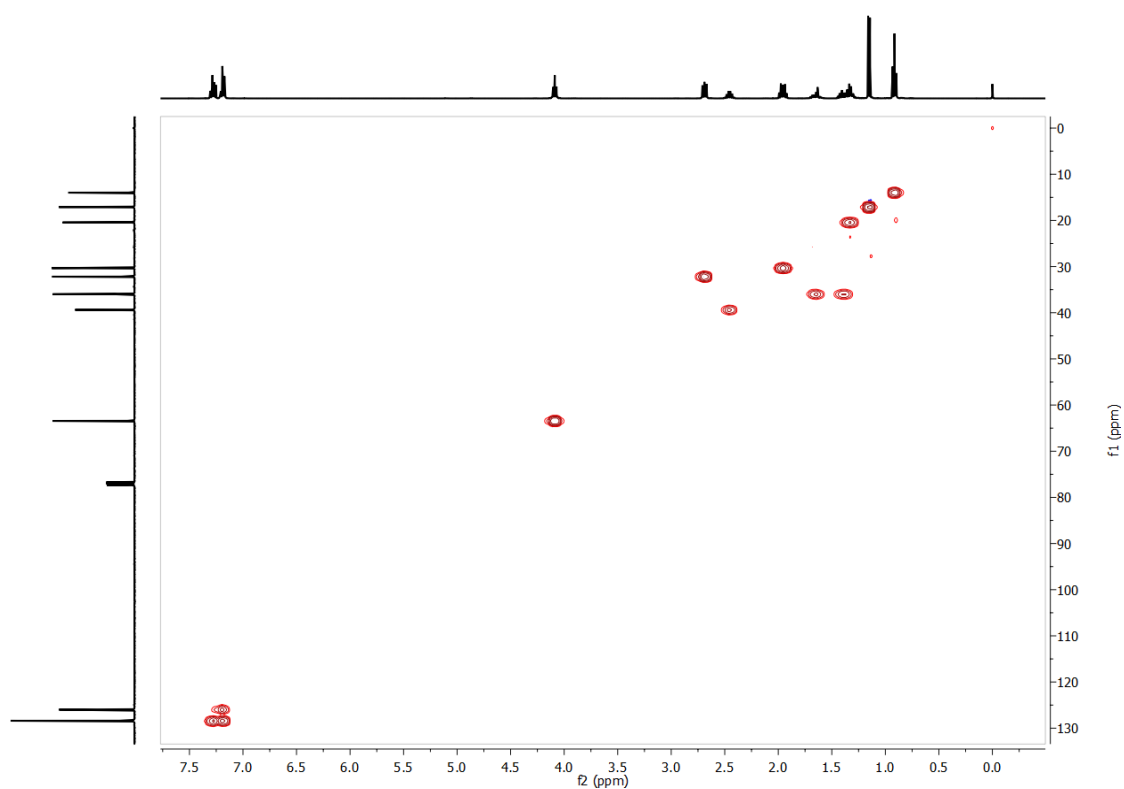

**Figure S87d.** grHSQC spectrum of 3-phenylpropyl 2-methylpentanoate (**4e**)

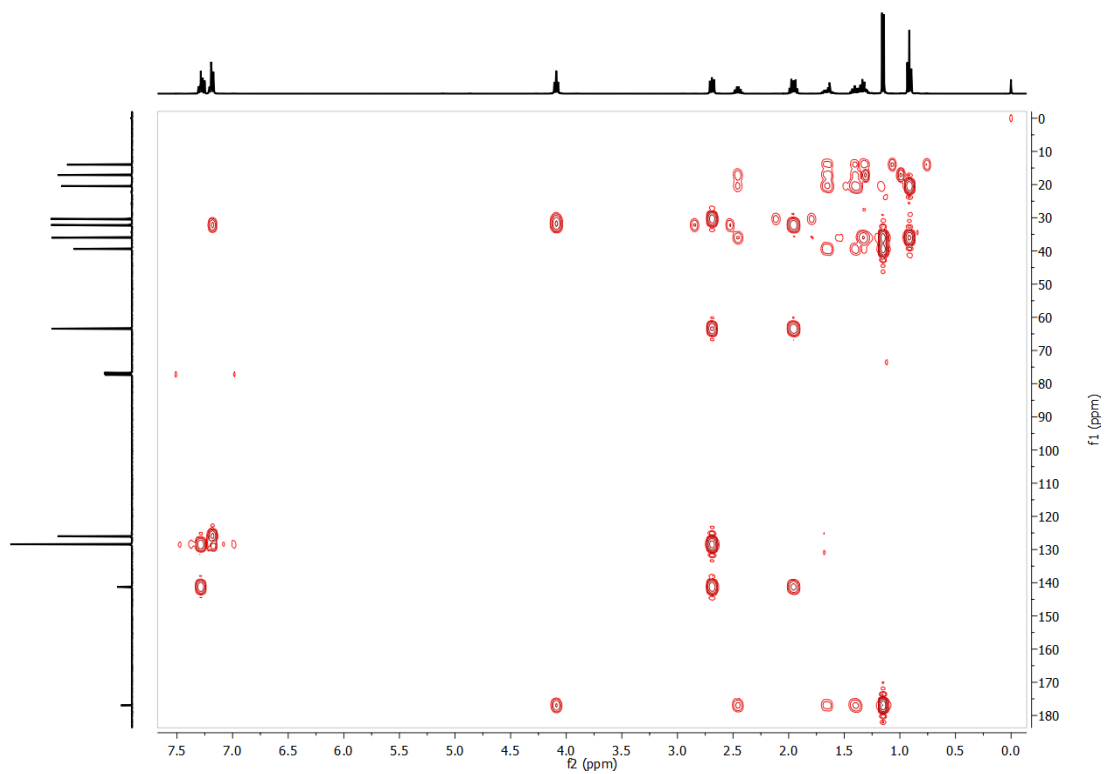

**Figure S87e.** grHMBC spectrum of 3-phenylpropyl 2-methylpentanoate (**4e**)

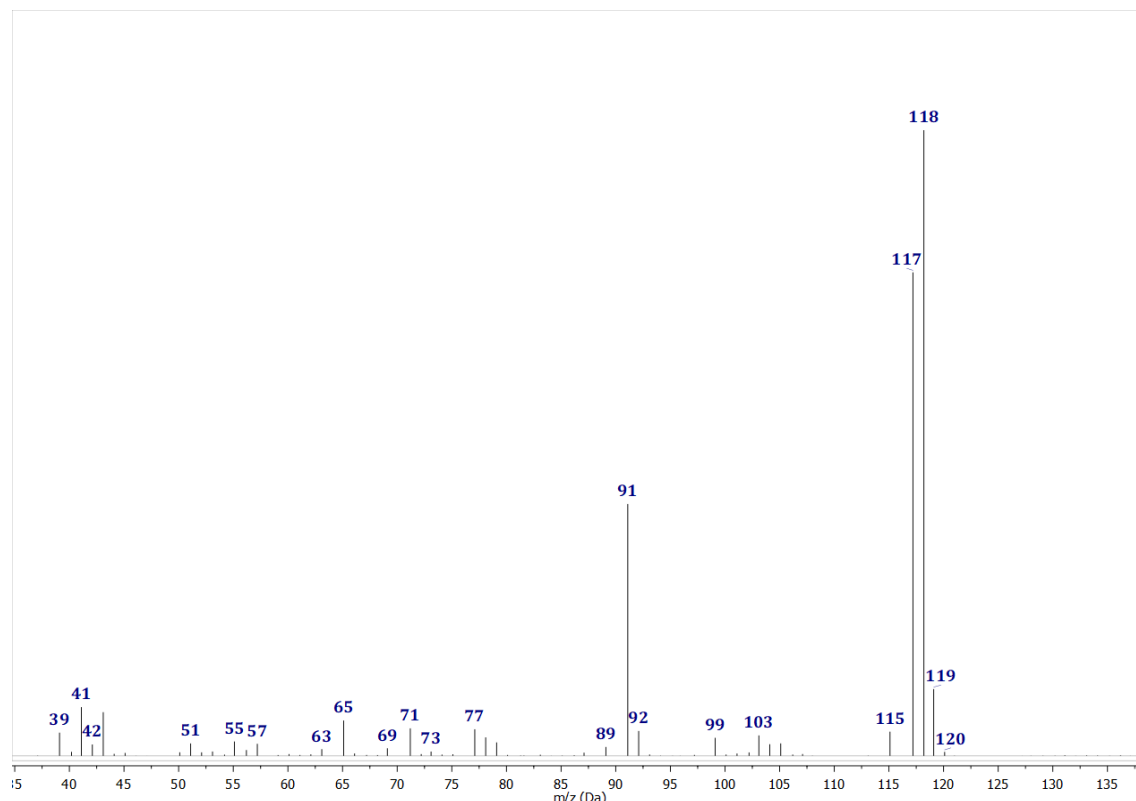

**Figure S88.** Mass spectrum of 3-phenylpropyl 3-methylpentanoate (**4f**)

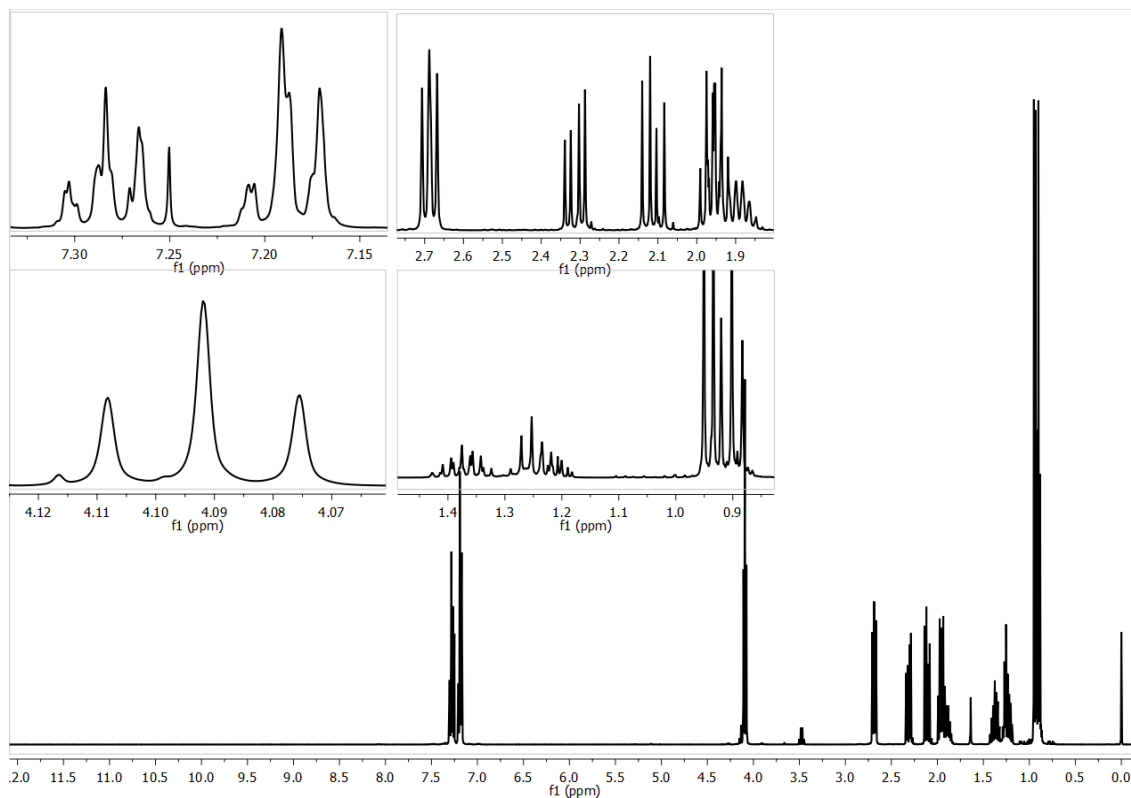

**Figure S89.**  $^1\text{H}$  NMR spectrum of 3-phenylpropyl 3-methylpentanoate (**4f**) recorded in  $\text{CDCl}_3$

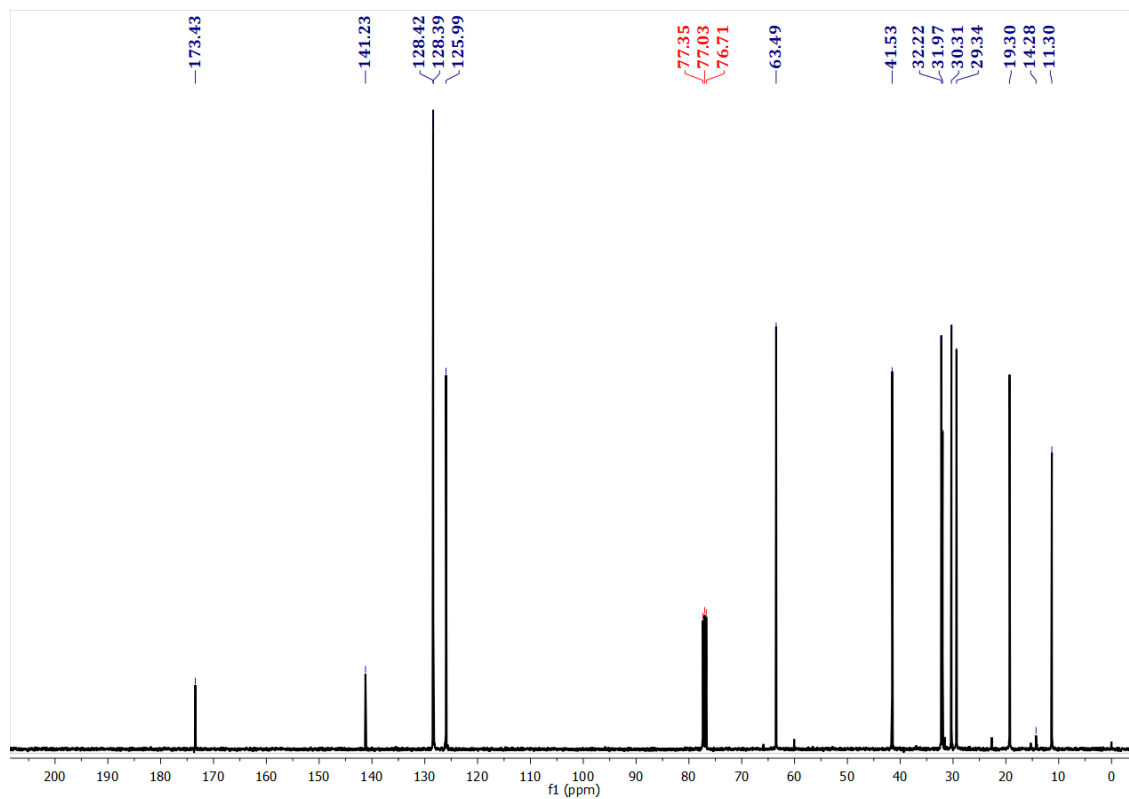

**Figure S90.**  $^{13}\text{C}$  NMR spectrum of 3-phenylpropyl 3-methylpentanoate (**4f**) recorded in  $\text{CDCl}_3$

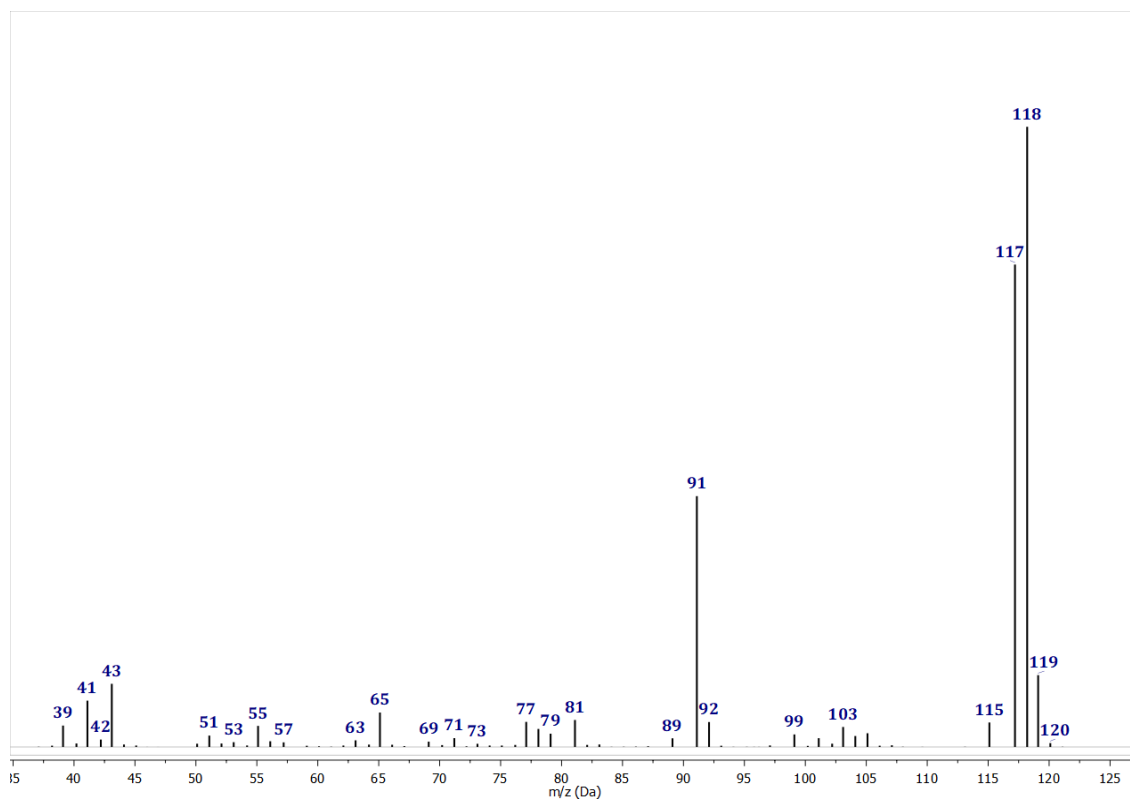

**Figure S91.** Mass spectrum of 3-phenylpropyl 4-methylpentanoate (**4g**)



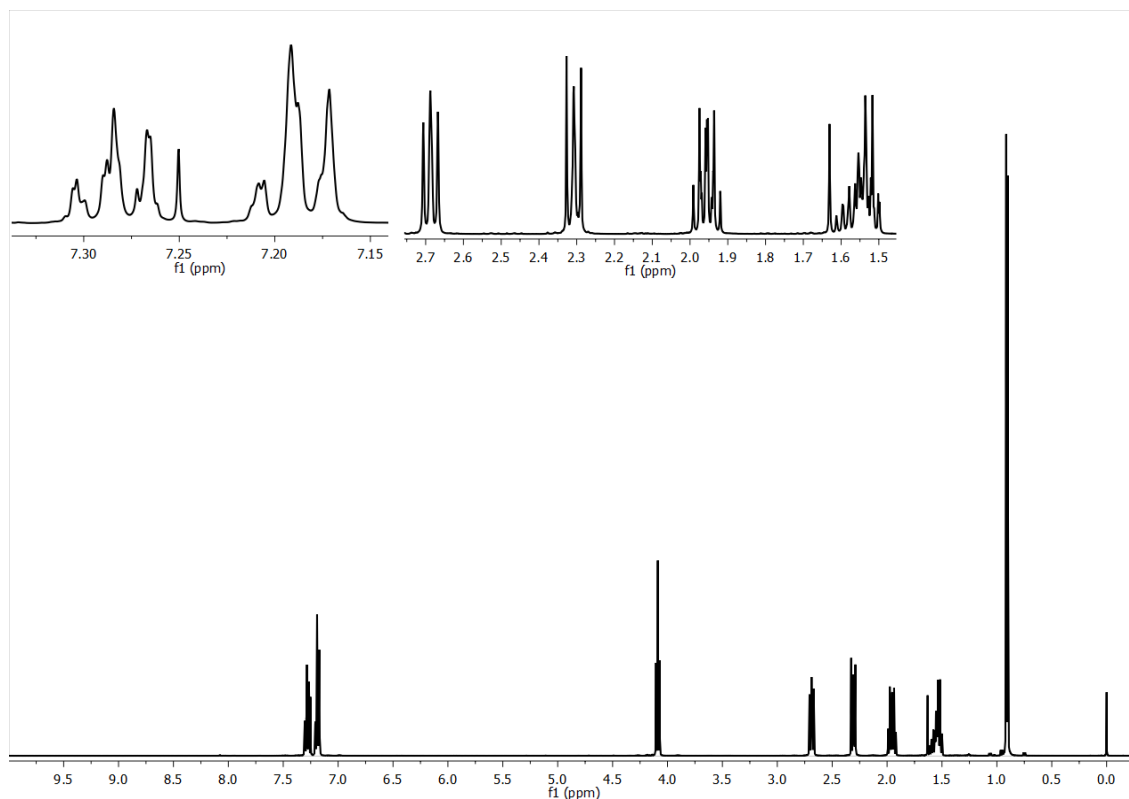

**Figure S92.** <sup>1</sup>H NMR spectrum of 3-phenylpropyl 4-methylpentanoate (**4g**) recorded in CDCl<sub>3</sub>

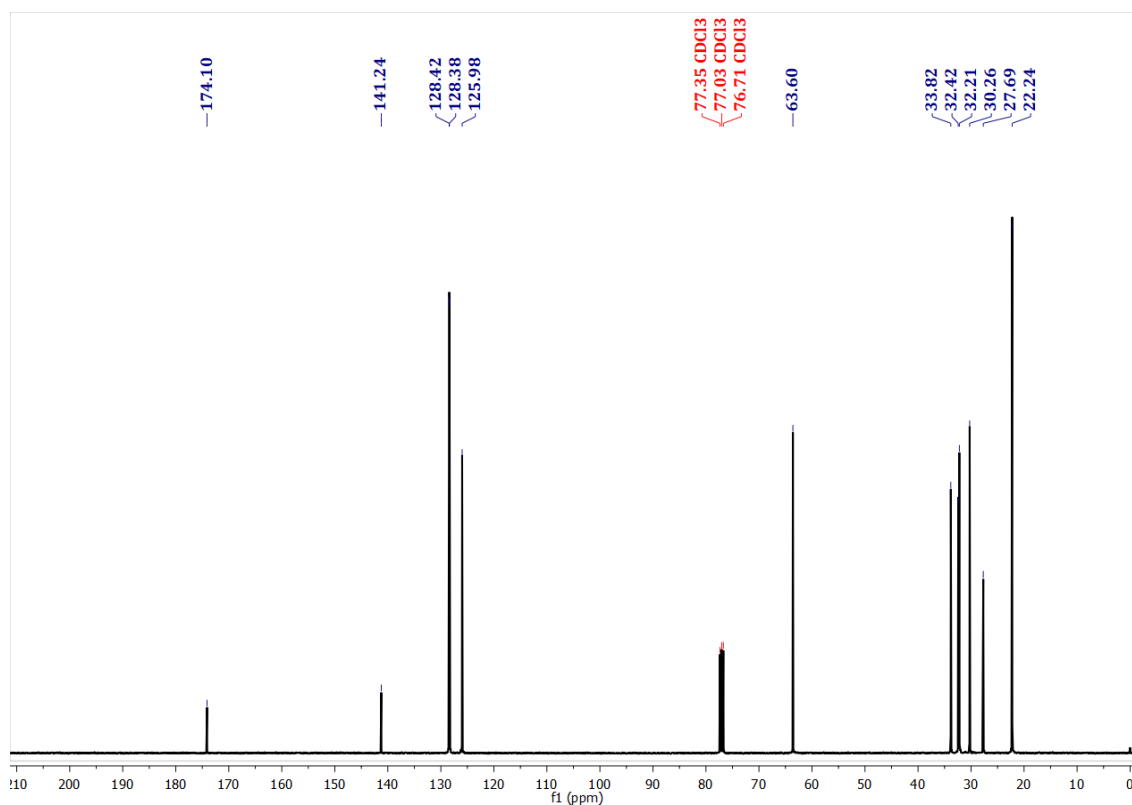

**Figure S93.** <sup>13</sup>C NMR spectrum of 3-phenylpropyl 4-methylpentanoate (**4g**) recorded in CDCl<sub>3</sub>

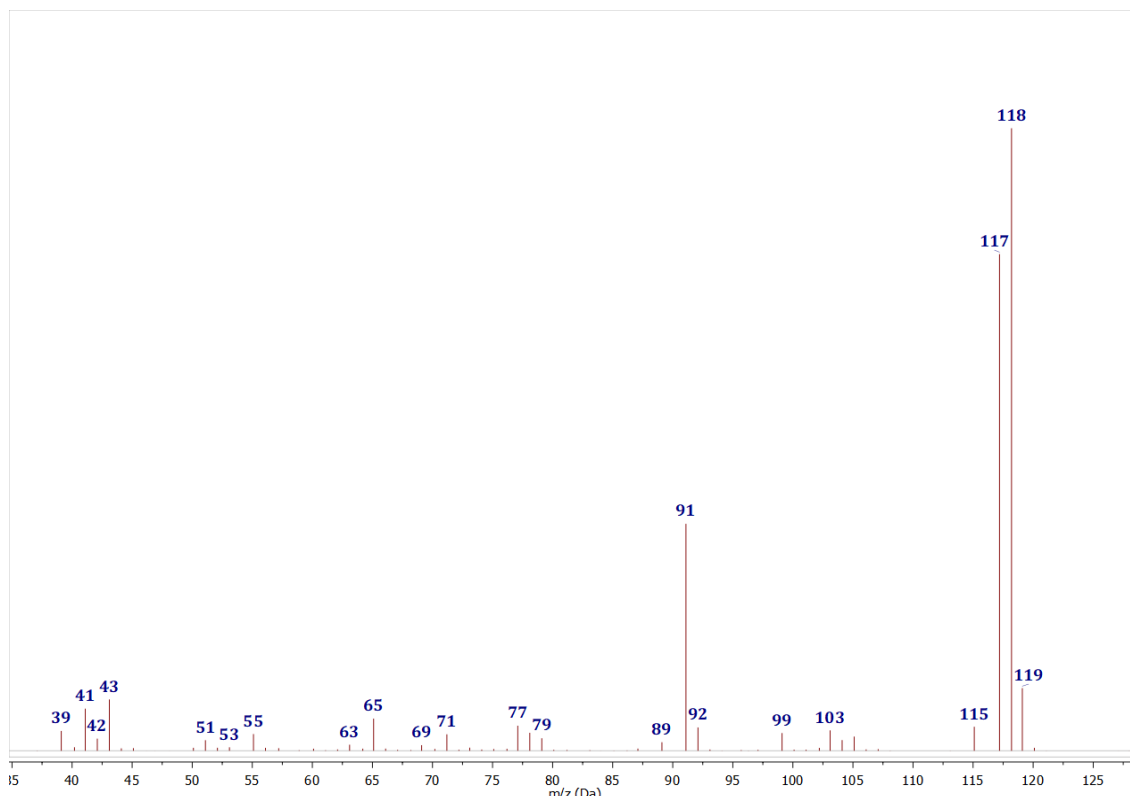

**Figure S94.** Mass spectrum of 3-phenylpropyl hexanoate (**4h**)

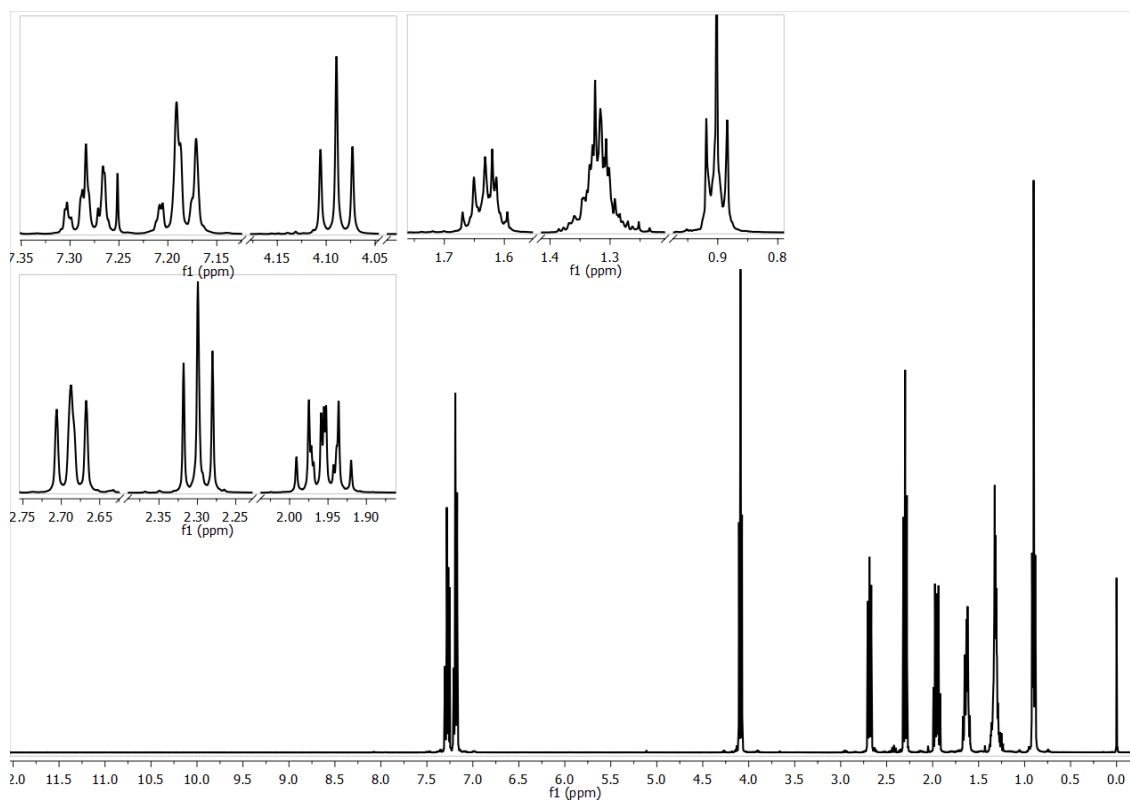

**Figure S95.**  $^1\text{H}$  NMR spectrum of 3-phenylpropyl hexanoate (**4h**) recorded in  $\text{CDCl}_3$

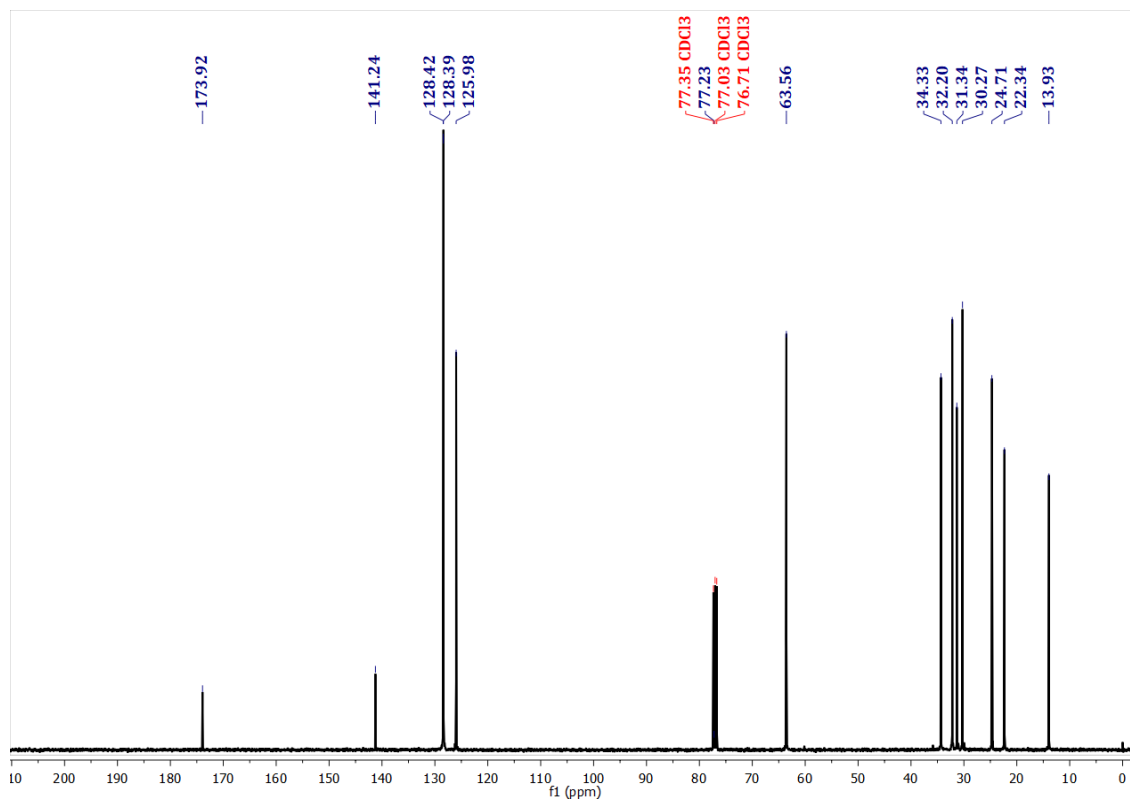

**Figure S96.** <sup>13</sup>C NMR spectrum of 3-phenylpropyl hexanoate (**4h**) recorded in CDCl<sub>3</sub>

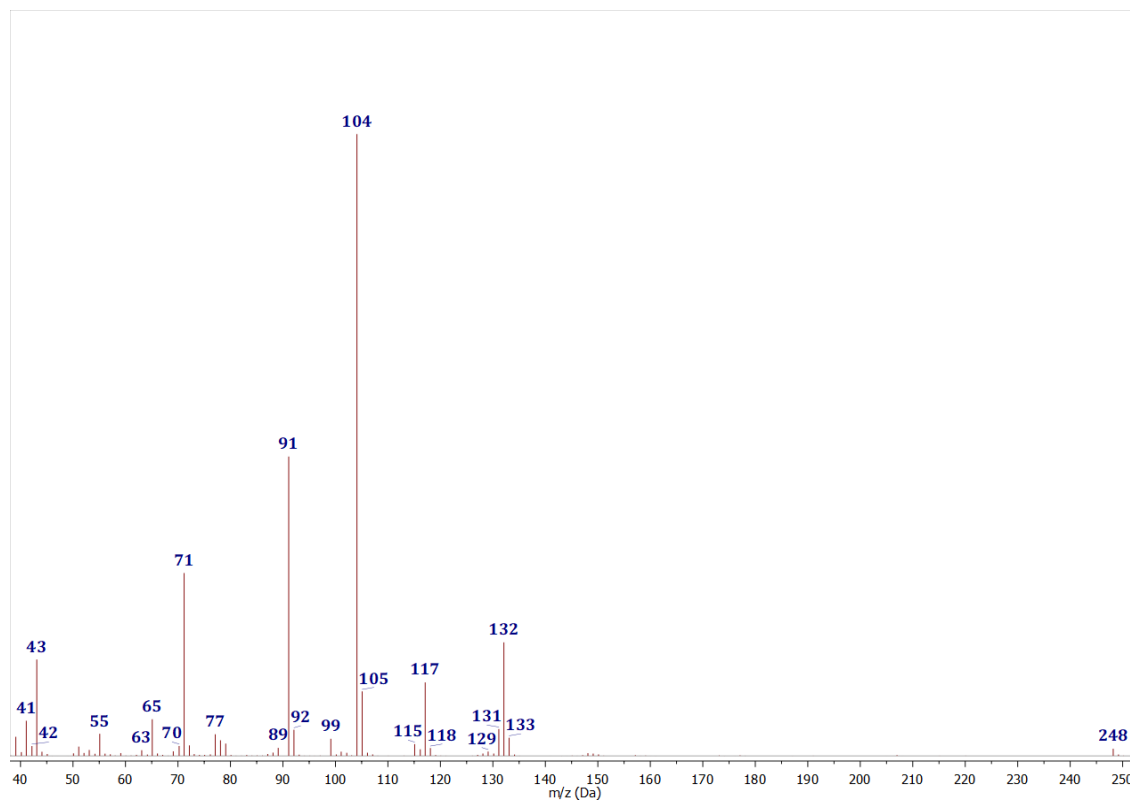

**Figure S97.** Mass spectrum of 4-phenylbutyl 2-ethylbutanoate (**5a**)

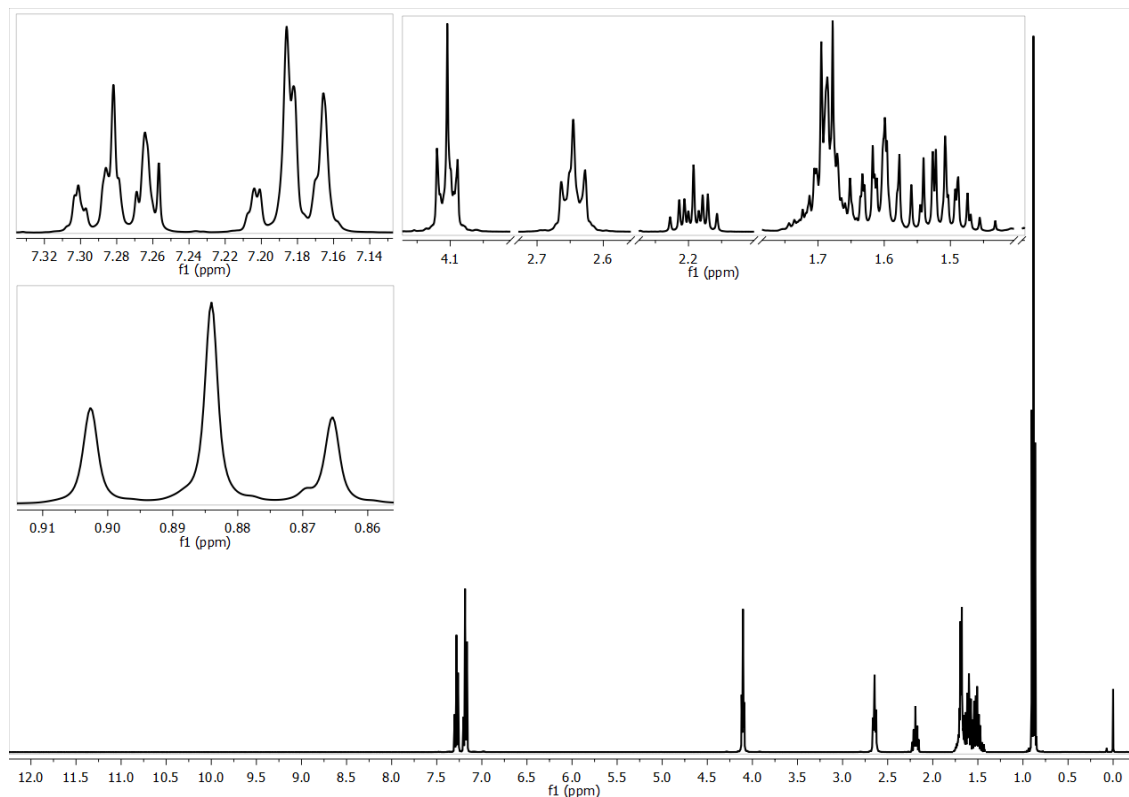

**Figure S98.** <sup>1</sup>H NMR spectrum of 4-phenylbutyl 2-ethylbutanoate (**5a**) recorded in CDCl<sub>3</sub>

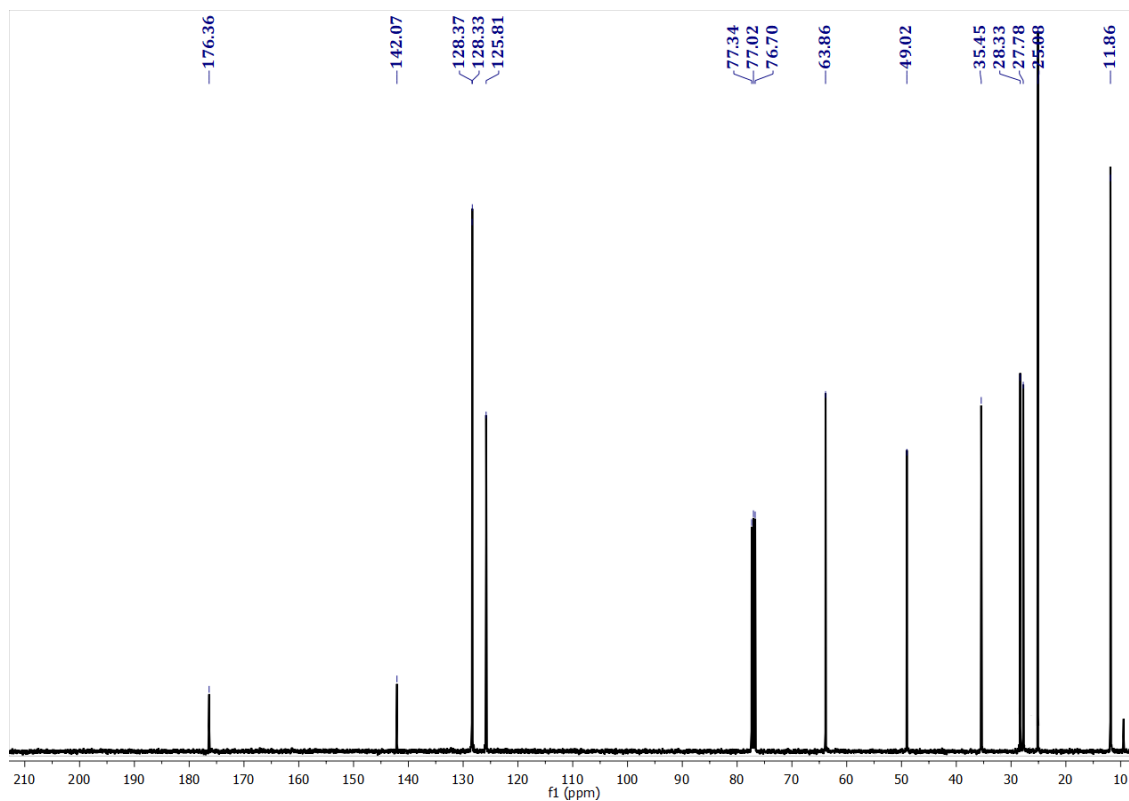

**Figure S99.** <sup>13</sup>C NMR spectrum of 4-phenylbutyl 2-ethylbutanoate (**5a**) recorded in CDCl<sub>3</sub>

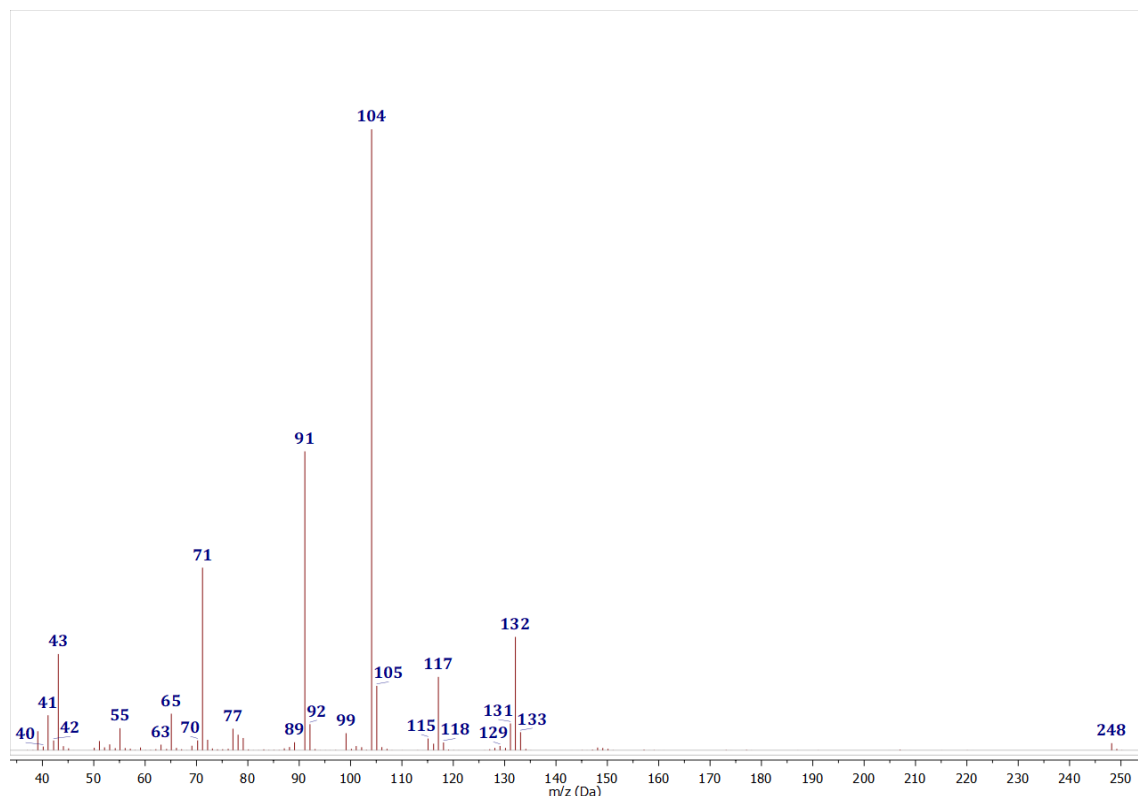

**Figure S100.** Mass spectrum of 4-phenylbutyl 2,2-dimethylbutanoate (**5b**)

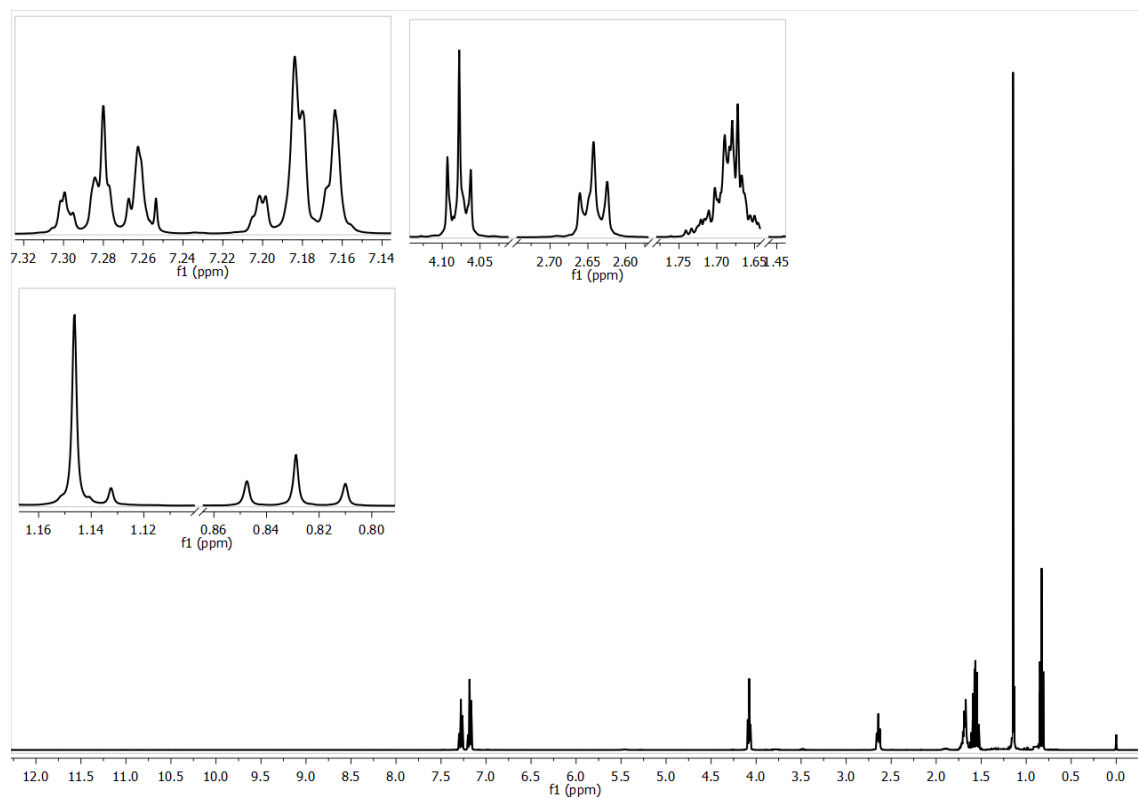

**Figure S101.**  $^1\text{H}$  NMR spectrum of 4-phenylbutyl 2,2-dimethylbutanoate (**5b**) recorded in  $\text{CDCl}_3$

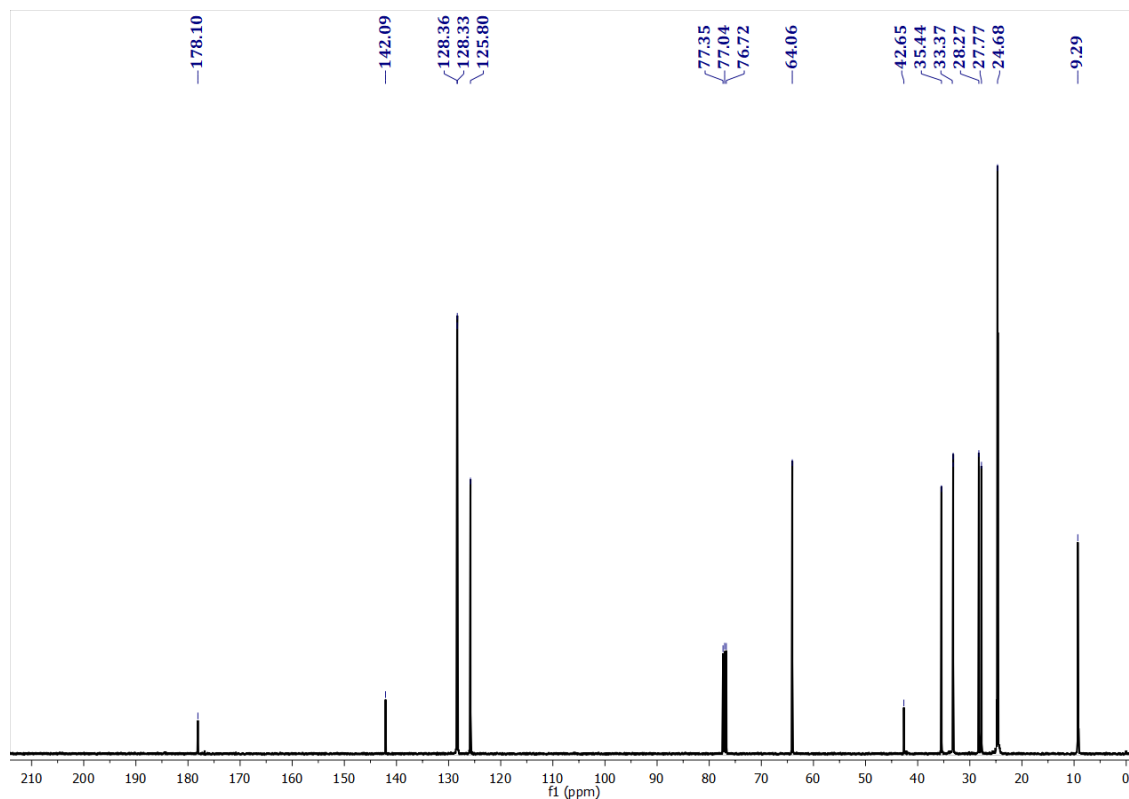

**Figure S102.** <sup>13</sup>C NMR spectrum of 4-phenylbutyl 2,2-dimethylbutanoate (**5b**) recorded in CDCl<sub>3</sub>

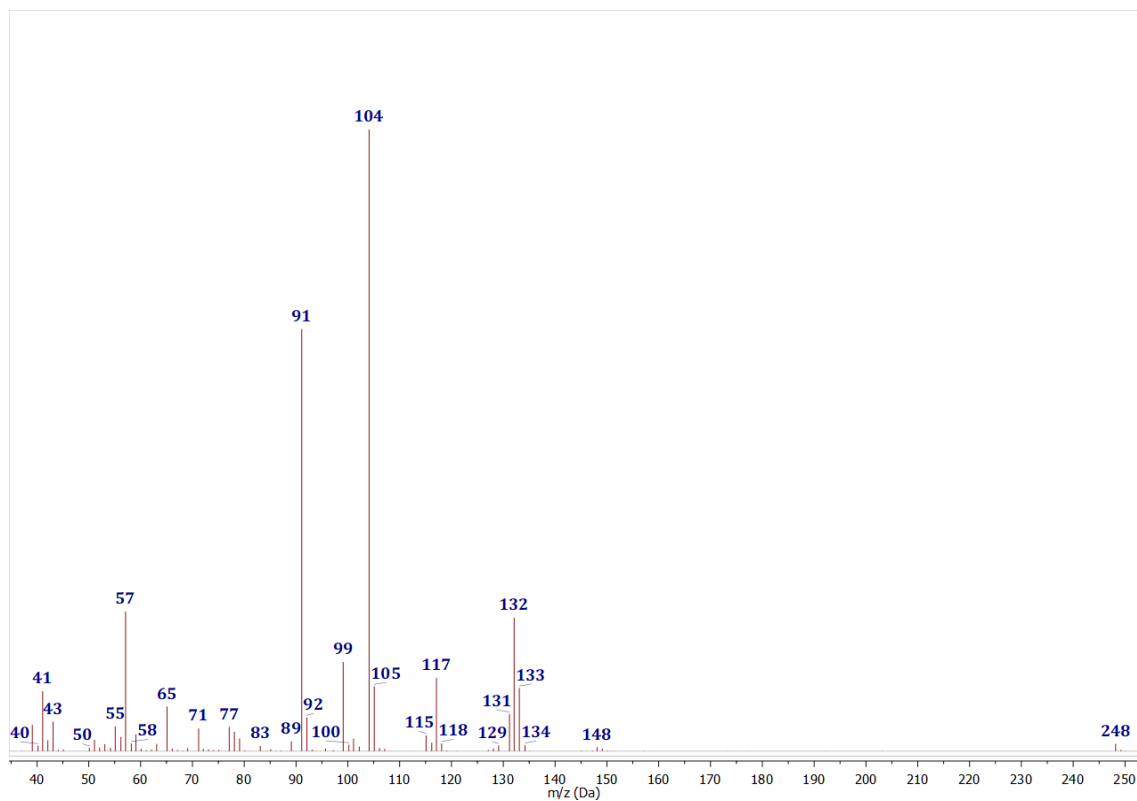

**Figure S103.** Mass spectrum of 4-phenylbutyl 3,3-dimethylbutanoate (**5c**)

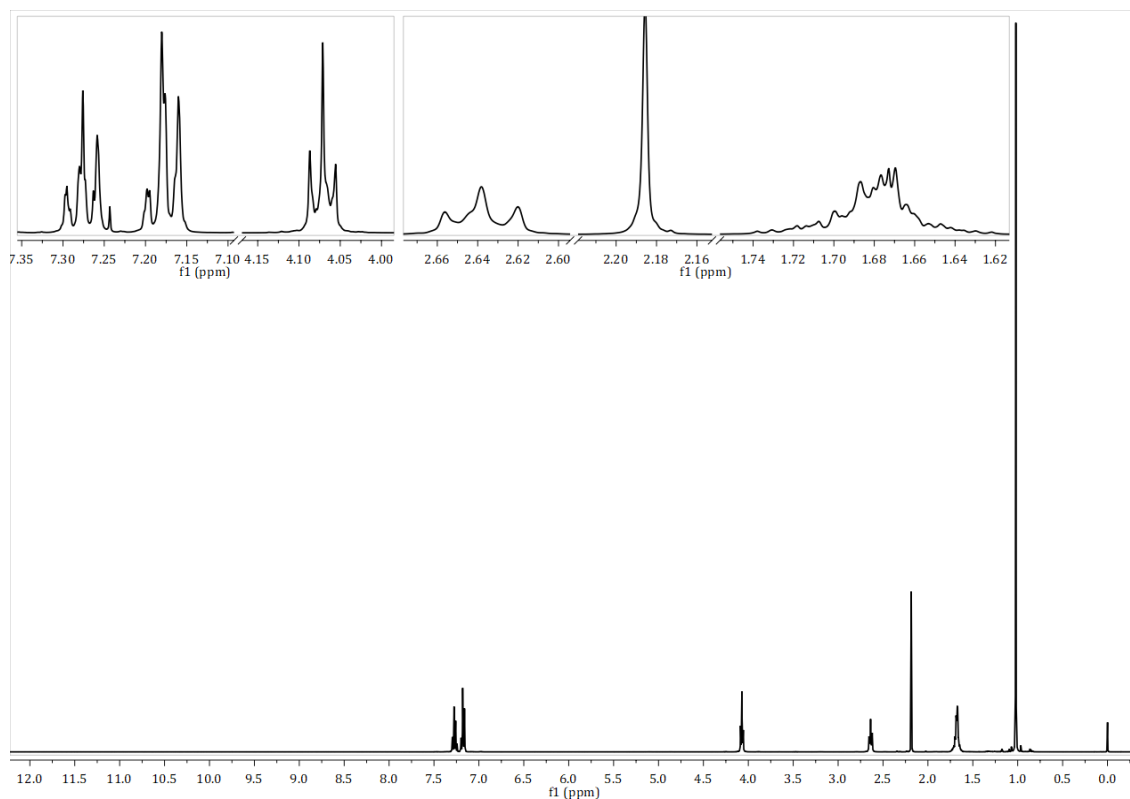

**Figure S104.**  $^1\text{H}$  NMR spectrum of 4-phenylbutyl 3,3-dimethylbutanoate (**5c**) recorded in  $\text{CDCl}_3$

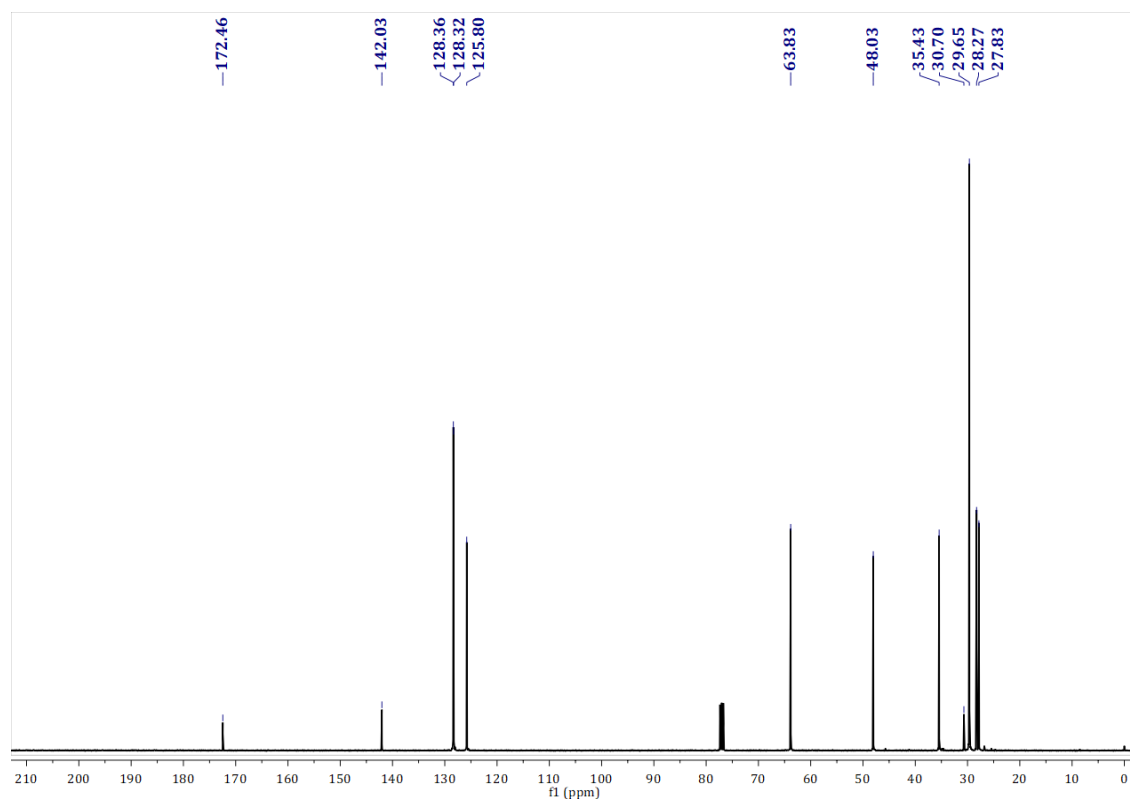

**Figure S105.**  $^{13}\text{C}$  NMR spectrum of 4-phenylbutyl 3,3-dimethylbutanoate (**5c**) recorded in  $\text{CDCl}_3$

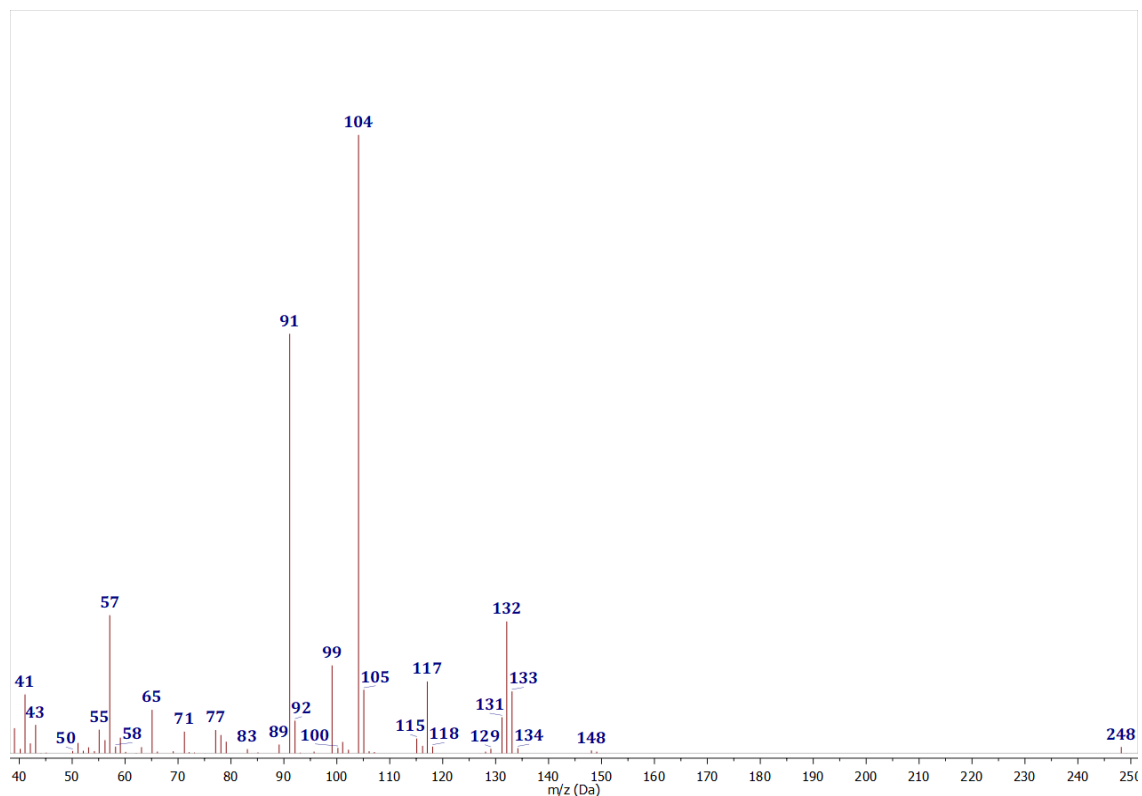

**Figure S106.** Mass spectrum of 4-phenylbutyl 2,3-dimethylbutanoate (**5d**)

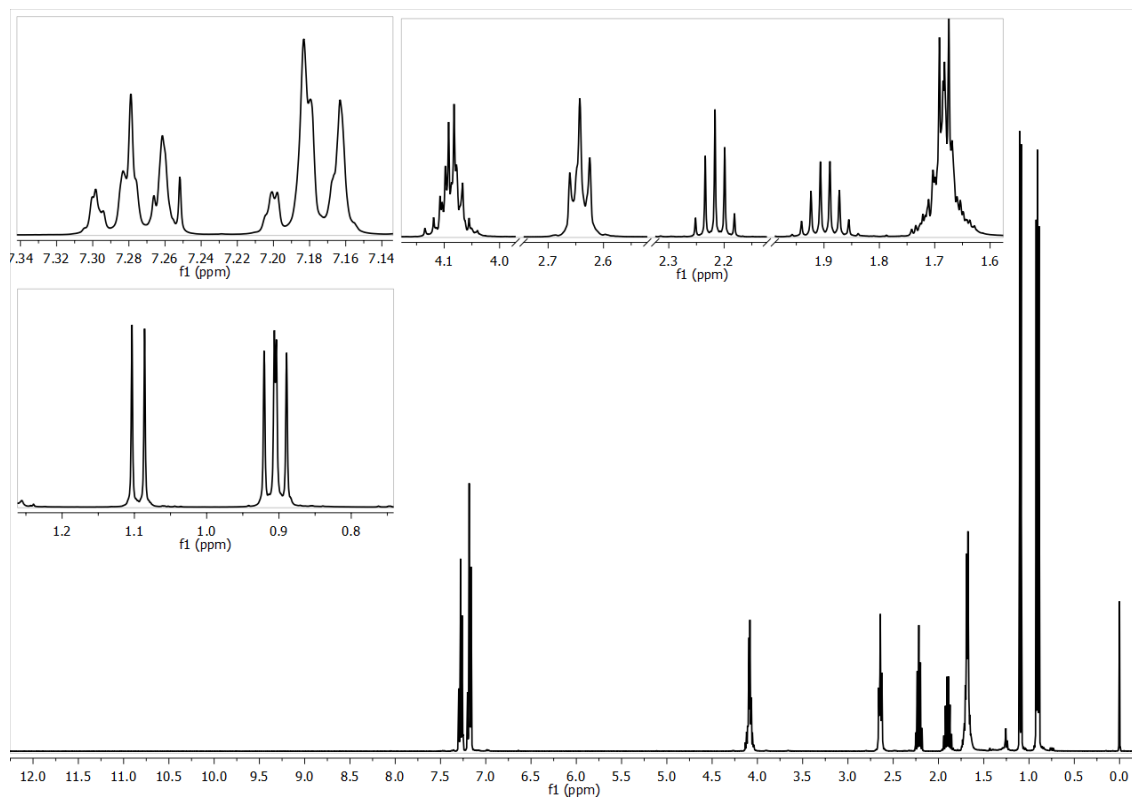

**Figure S107.**  $^1\text{H}$  NMR spectrum of 4-phenylbutyl 2,3-dimethylbutanoate (**5d**) recorded in  $\text{CDCl}_3$



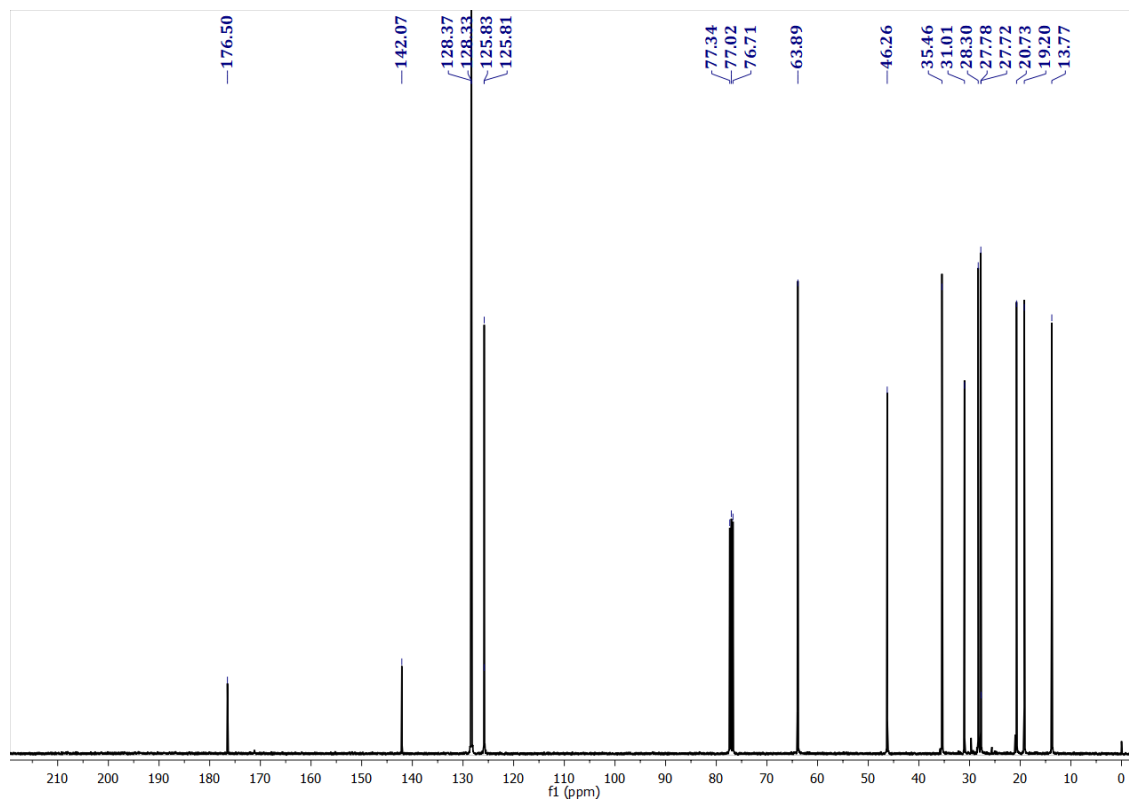

**Figure S108.** <sup>13</sup>C NMR spectrum of 4-phenylbutyl 2,3-dimethylbutanoate (**5d**) recorded in CDCl<sub>3</sub>

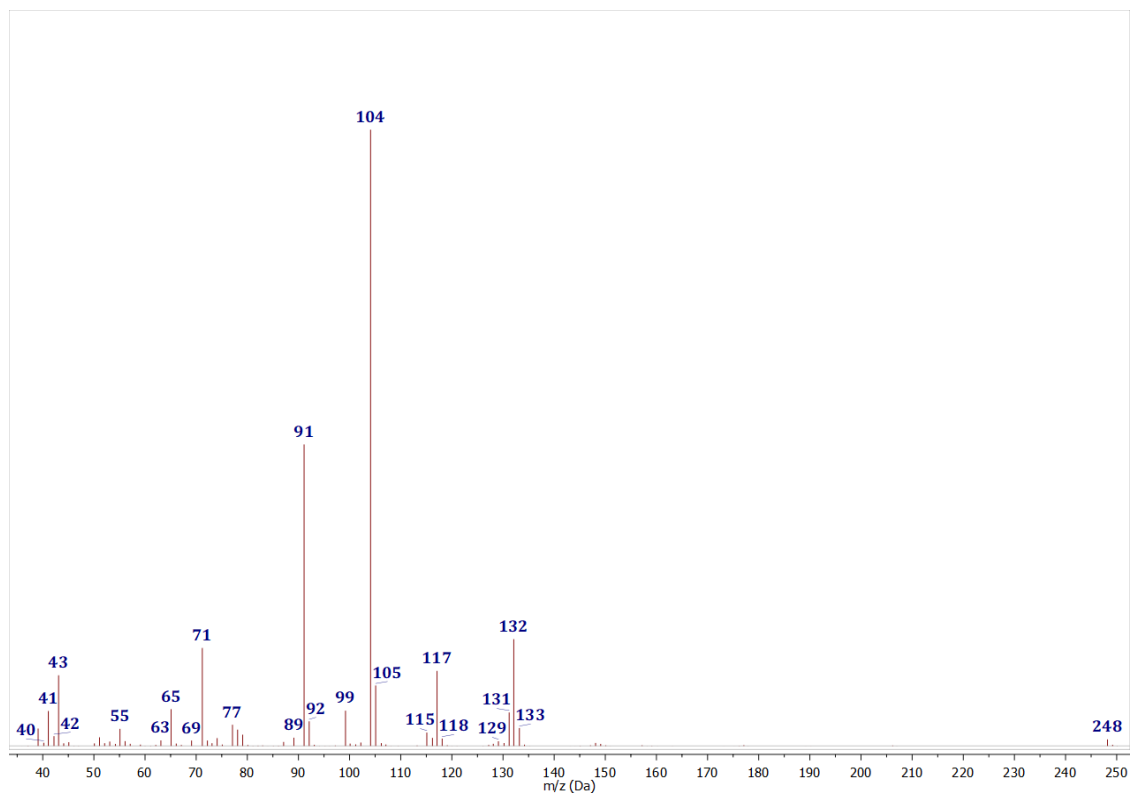

**Figure S109.** Mass spectrum of 4-phenylbutyl 2-methylpentanoate (**5e**)

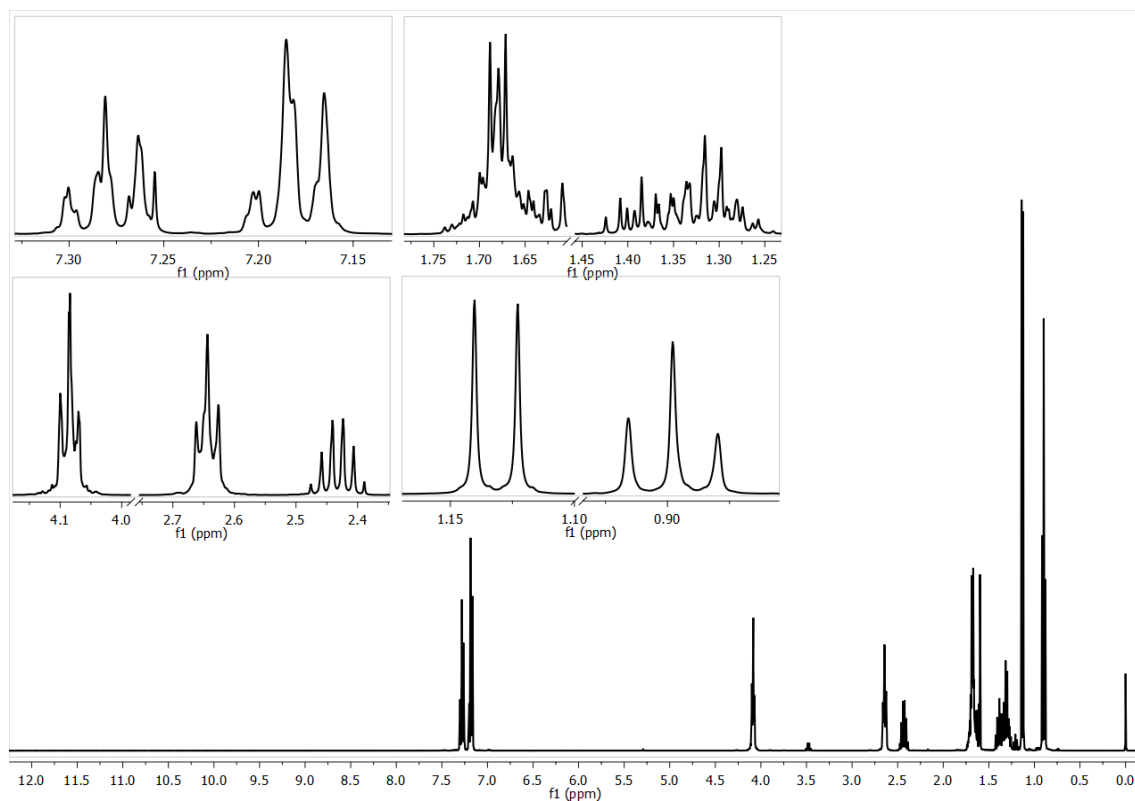

**Figure S110.**  $^1\text{H}$  NMR spectrum of 4-phenylbutyl 2-methylpentanoate (**5e**) recorded in  $\text{CDCl}_3$

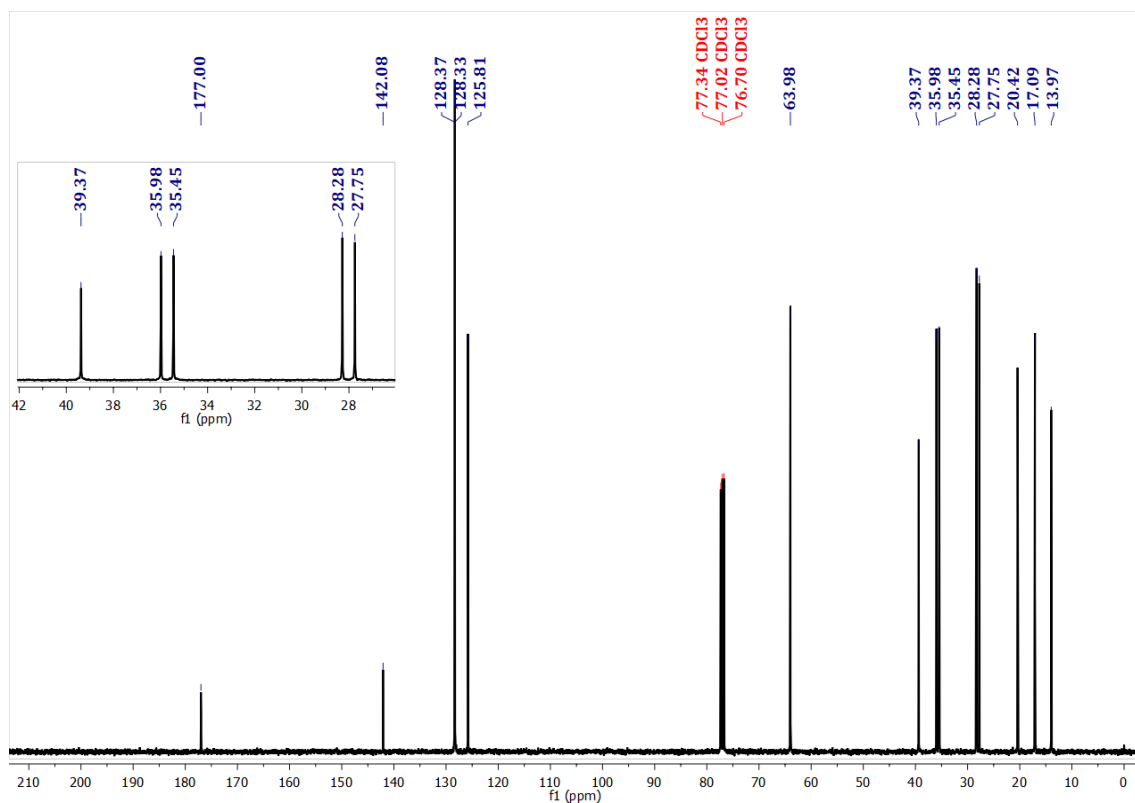

**Figure S111.**  $^{13}\text{C}$  NMR spectrum of 4-phenylbutyl 2-methylpentanoate (**5e**) recorded in  $\text{CDCl}_3$

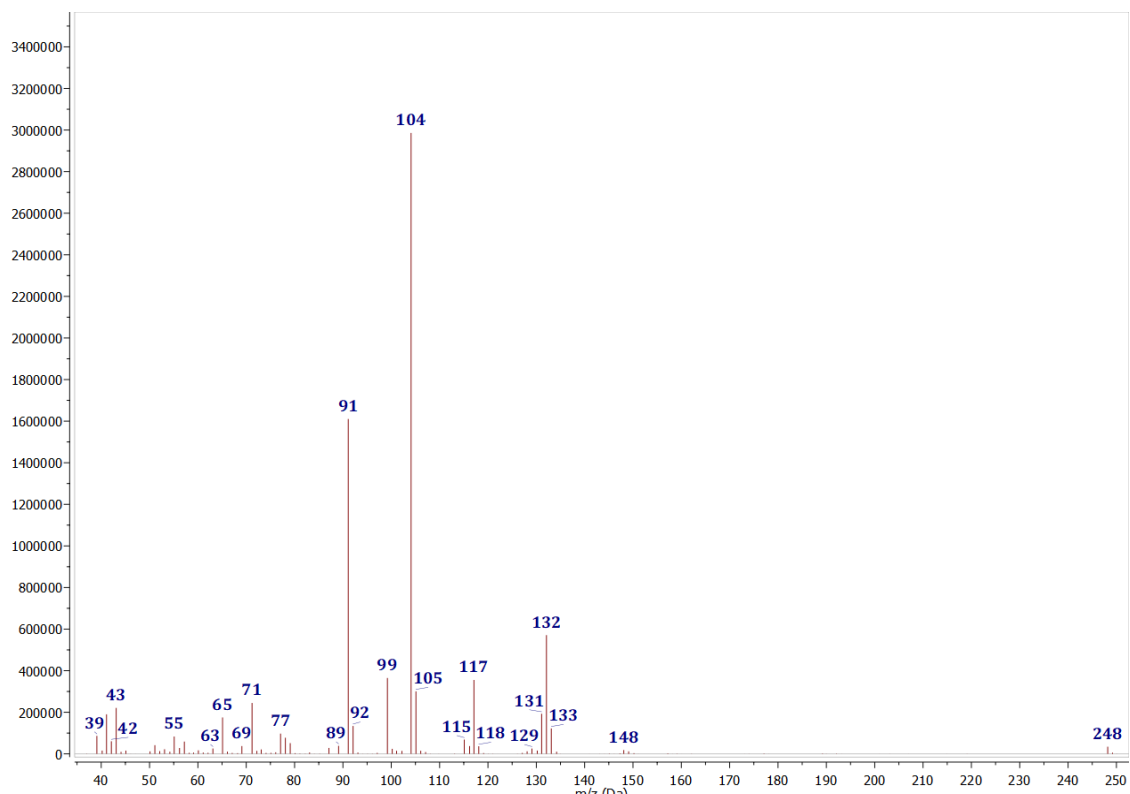

**Figure S112.** Mass spectrum of 4-phenylbutyl 3-methylpentanoate (**5f**)

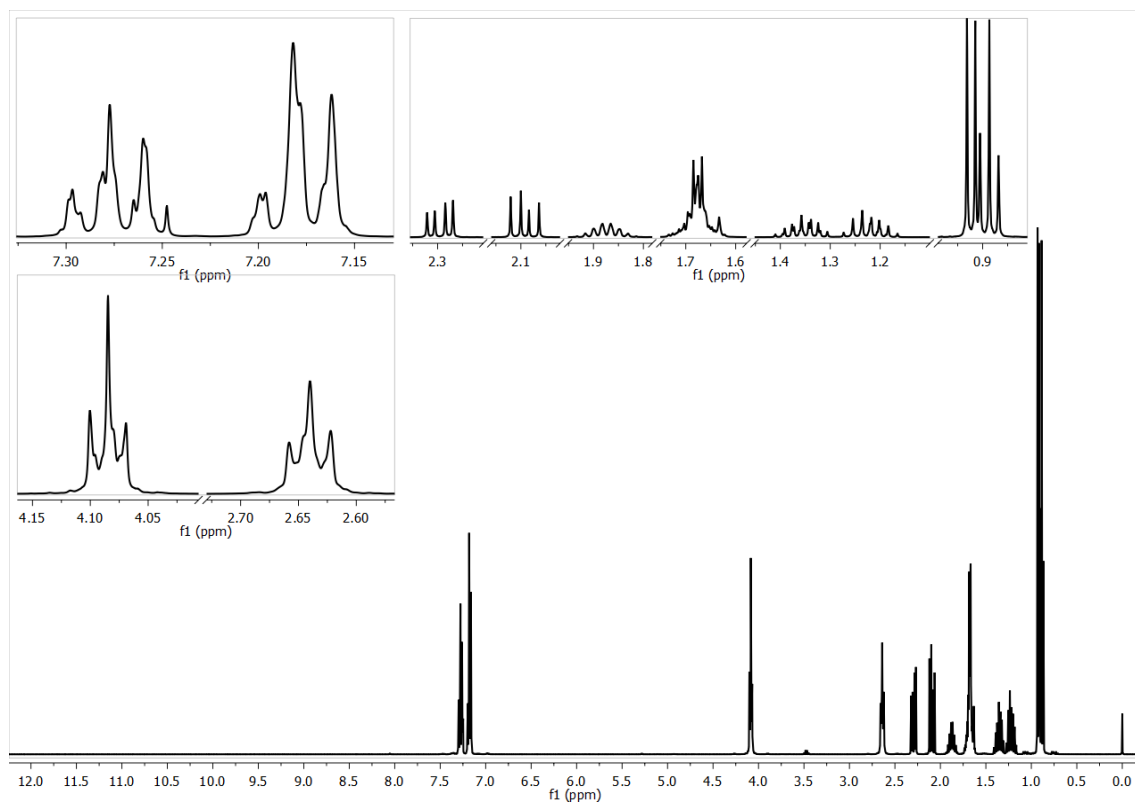

**Figure S113.**  $^1\text{H}$  NMR spectrum of 4-phenylbutyl 3-methylpentanoate (**5f**) recorded in  $\text{CDCl}_3$

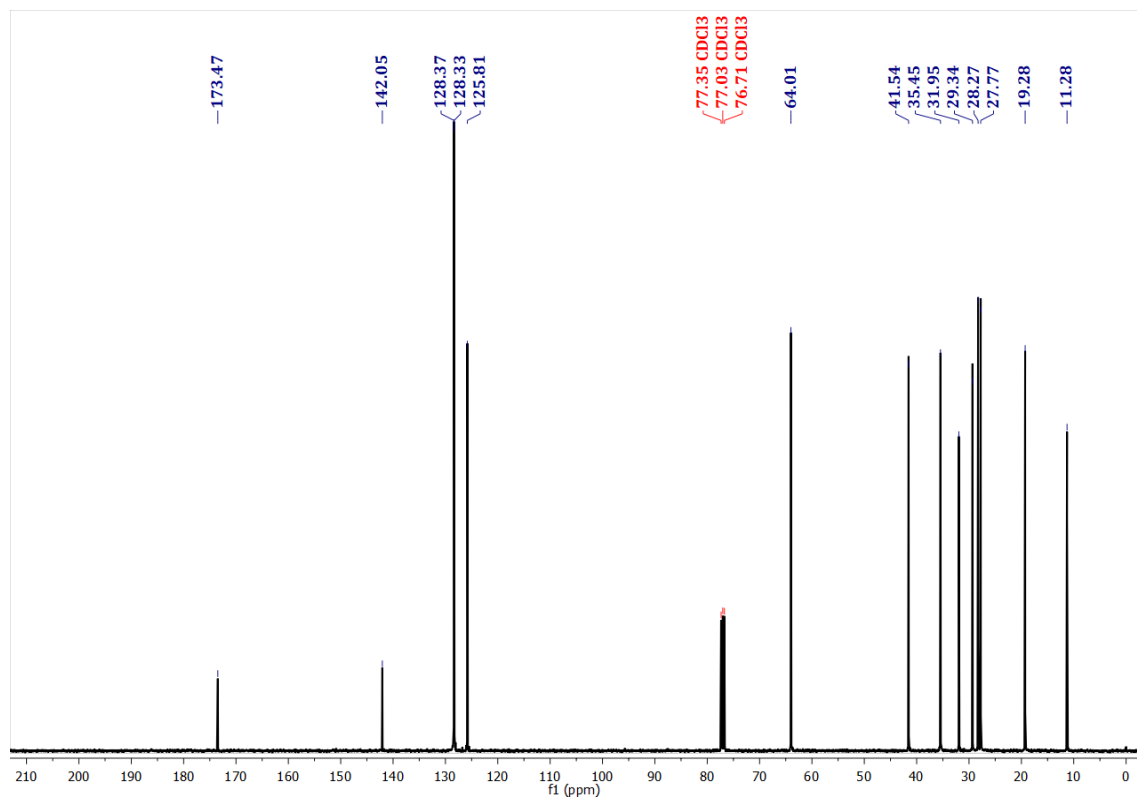

**Figure S114.** <sup>13</sup>C NMR spectrum of 4-phenylbutyl 3-methylpentanoate (**5f**) recorded in CDCl<sub>3</sub>

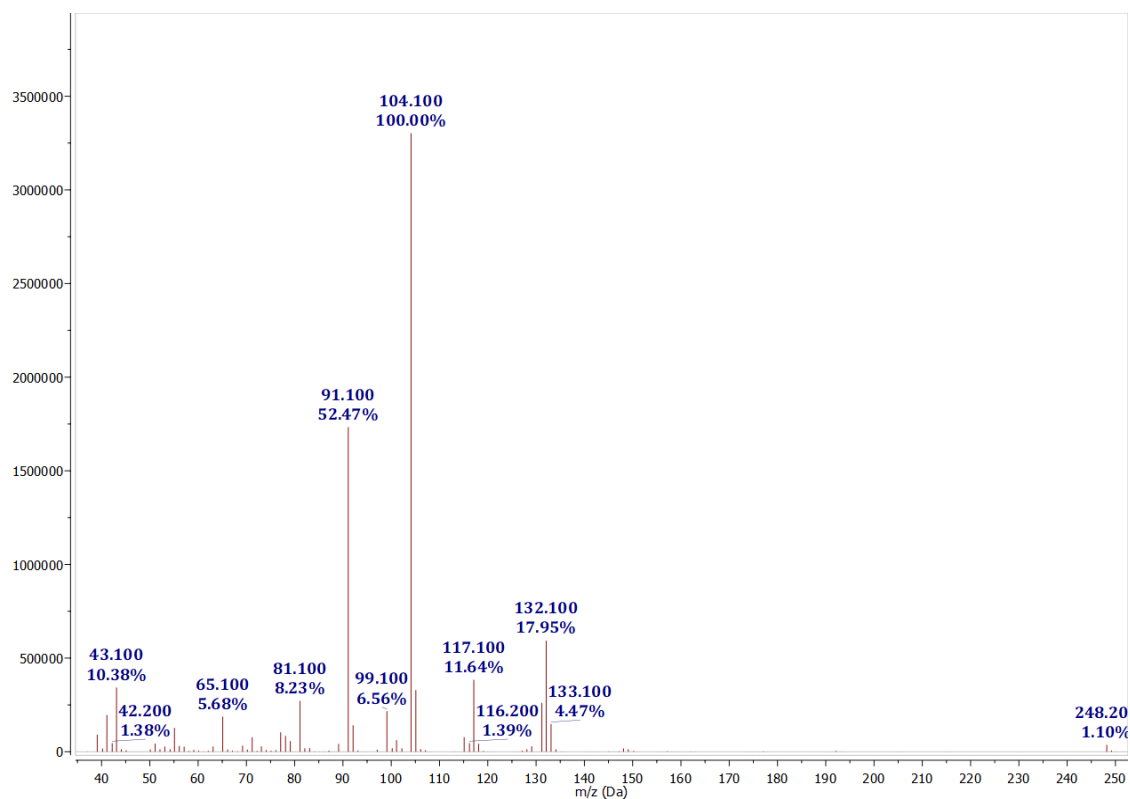

**Figure S115.** Mass spectrum of 4-phenylbutyl 4-methylpentanoate (**5g**)

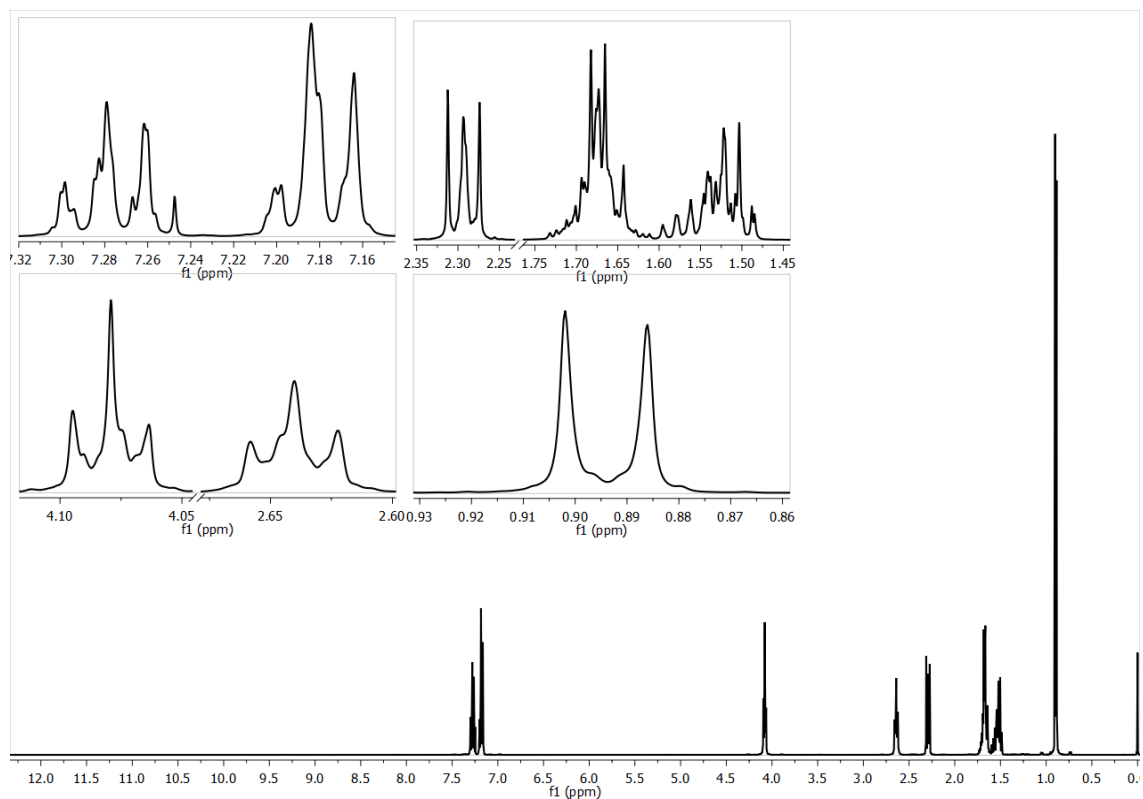

**Figure S116.** <sup>1</sup>H NMR spectrum of 4-phenylbutyl 4-methylpentanoate (**5g**) recorded in CDCl<sub>3</sub>

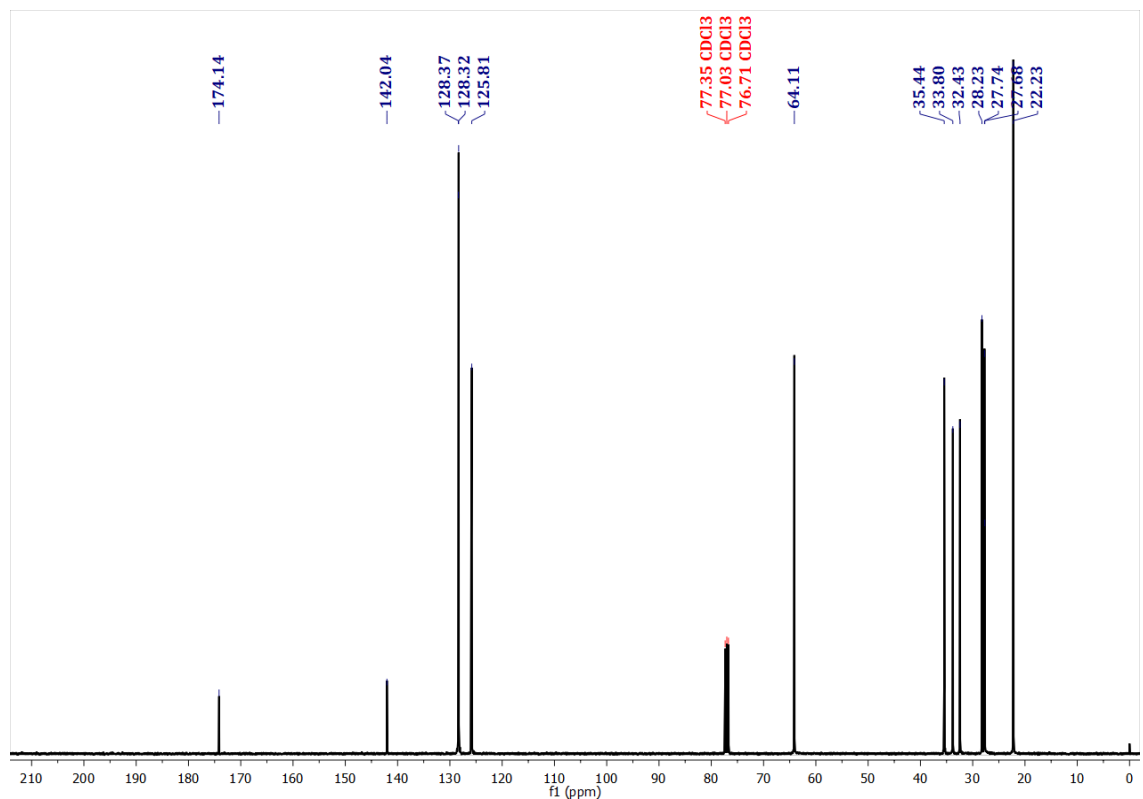

**Figure S117.** <sup>13</sup>C NMR spectrum of 4-phenylbutyl 4-methylpentanoate (**5g**) recorded in CDCl<sub>3</sub>

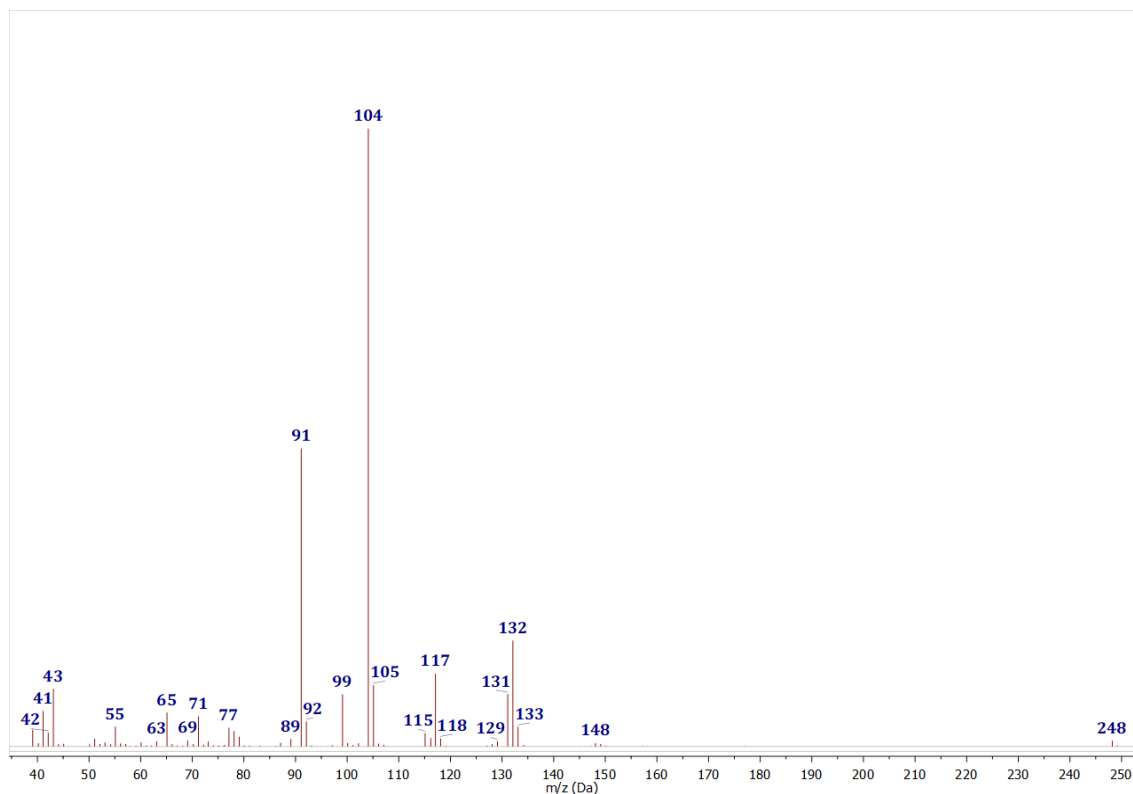

**Figure S118.** Mass spectrum of 4-phenylbutyl hexanoate (**5h**)

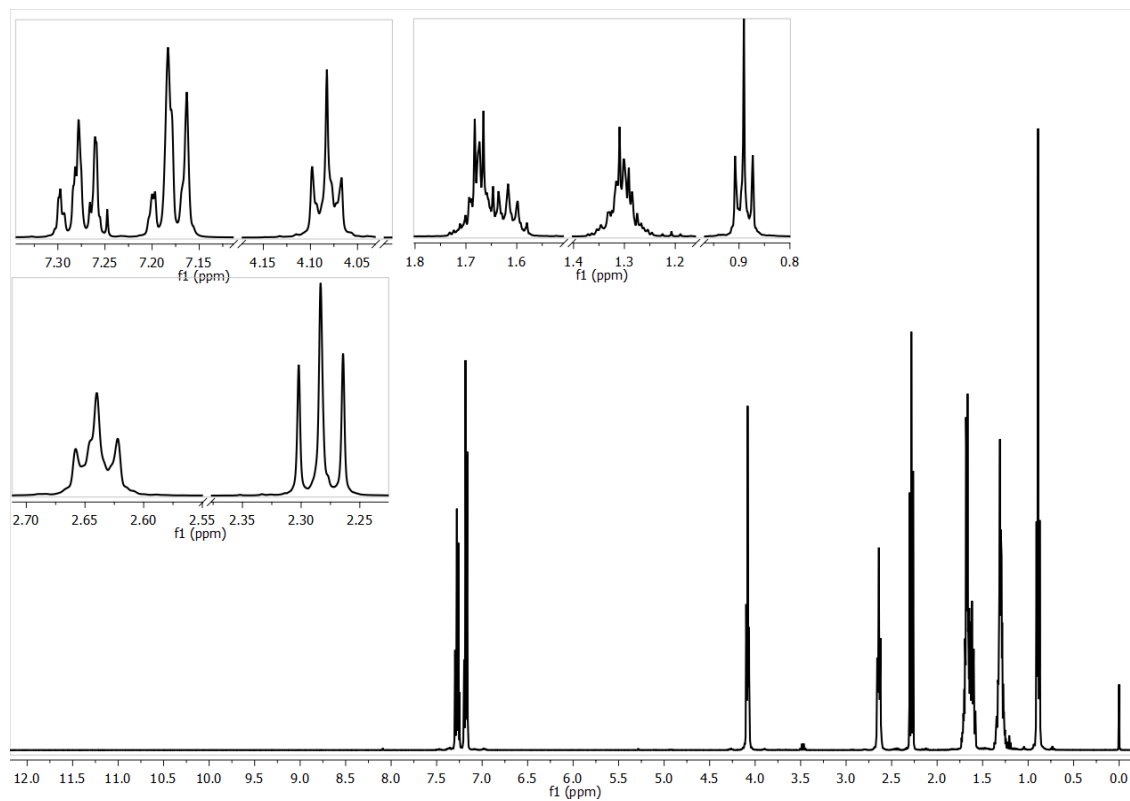

**Figure S119.**  $^1\text{H}$  NMR spectrum of 4-phenylbutyl hexanoate (**5h**) recorded in  $\text{CDCl}_3$

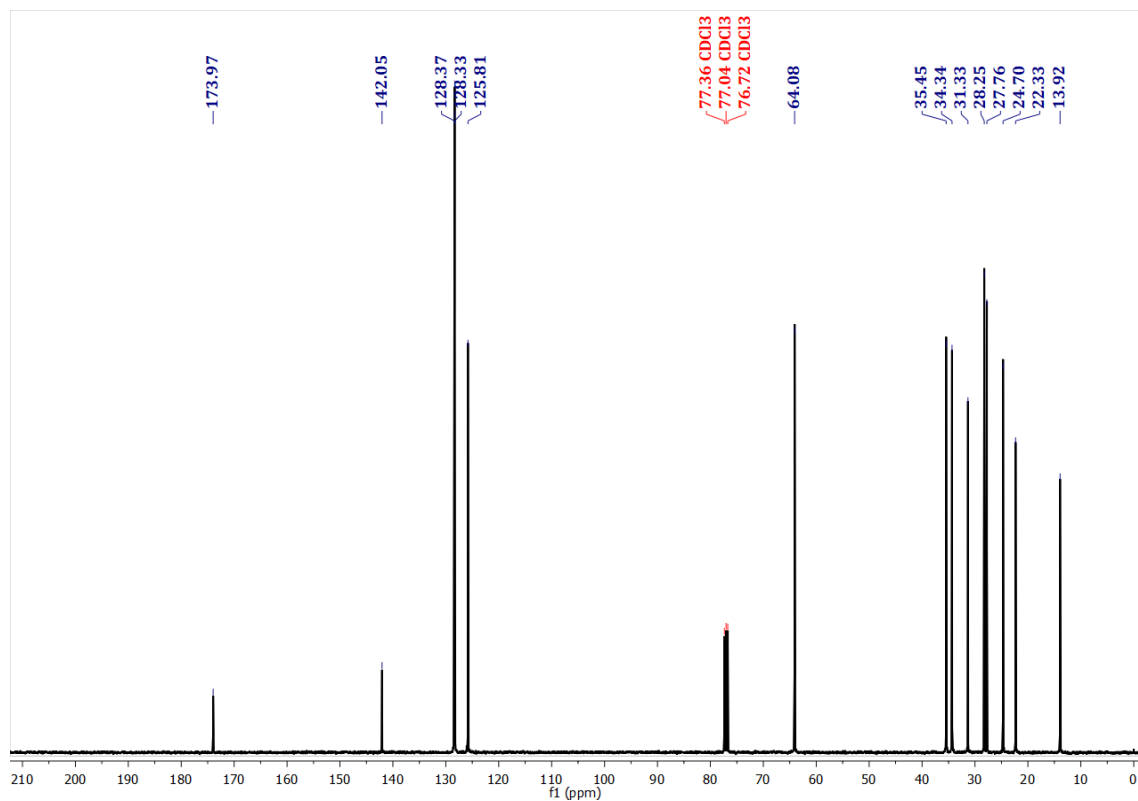

**Figure S120.** <sup>13</sup>C NMR spectrum of 4-phenylbutyl hexanoate (**5h**) recorded in CDCl<sub>3</sub>

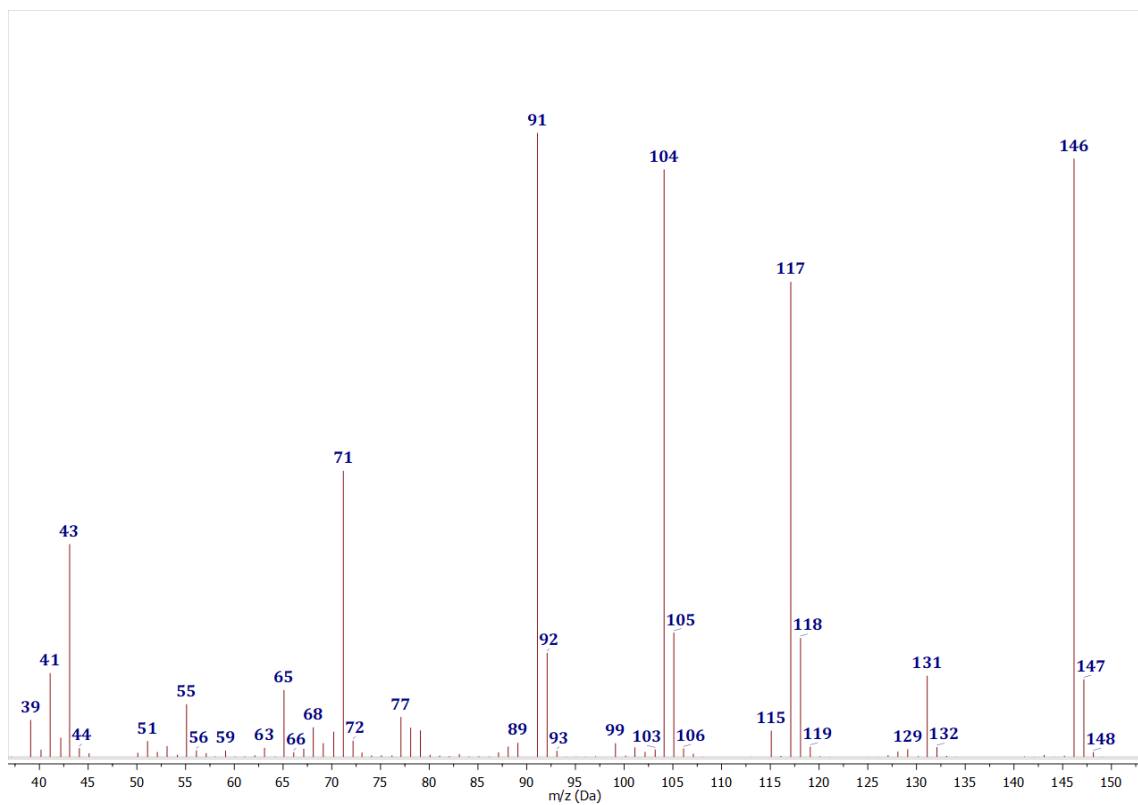

**Figure S121.** Mass spectrum of 5-phenylpentyl 2-ethylbutanoate (**6a**)

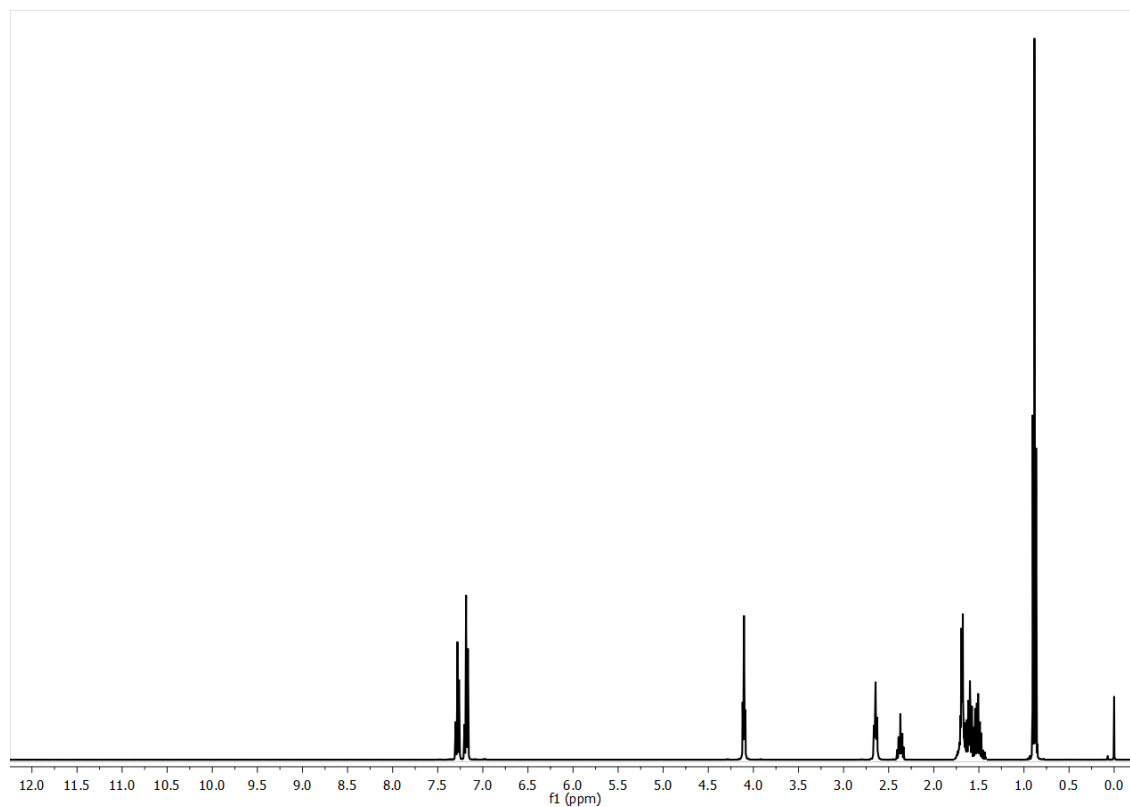

**Figure S122.** <sup>1</sup>H NMR spectrum of 5-phenylpentyl 2-ethylbutanoate (**6a**) recorded in CDCl<sub>3</sub>

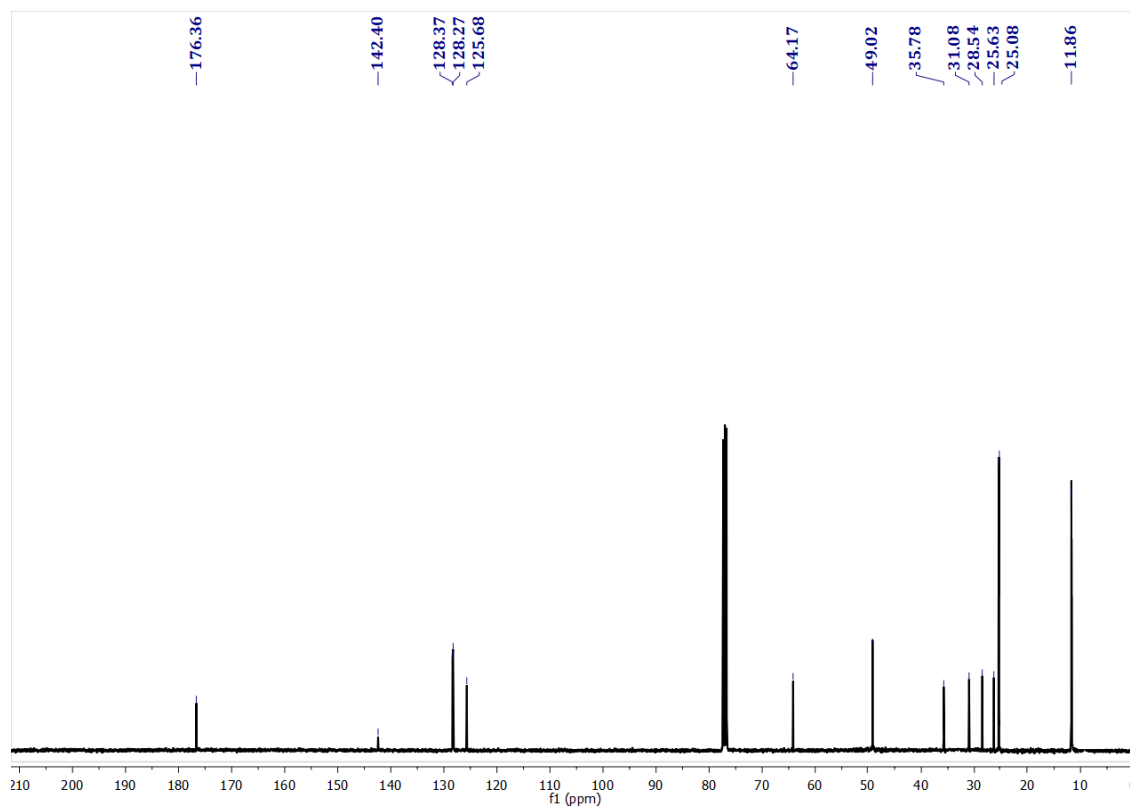

**Figure S123.** <sup>13</sup>C NMR spectrum of 5-phenylpentyl 2-ethylbutanoate (**6a**) recorded in CDCl<sub>3</sub>



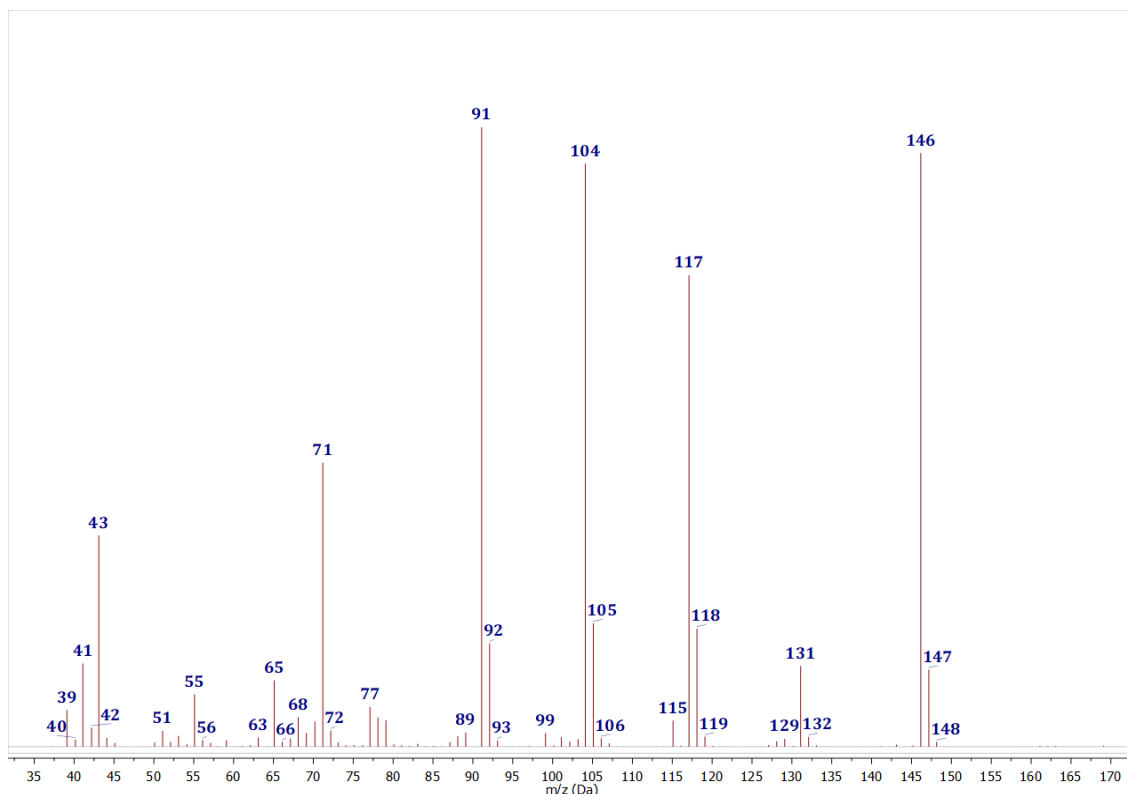

**Figure S124.** Mass spectrum of 5-phenylpentyl 2,2-dimethylbutanoate (**6b**)

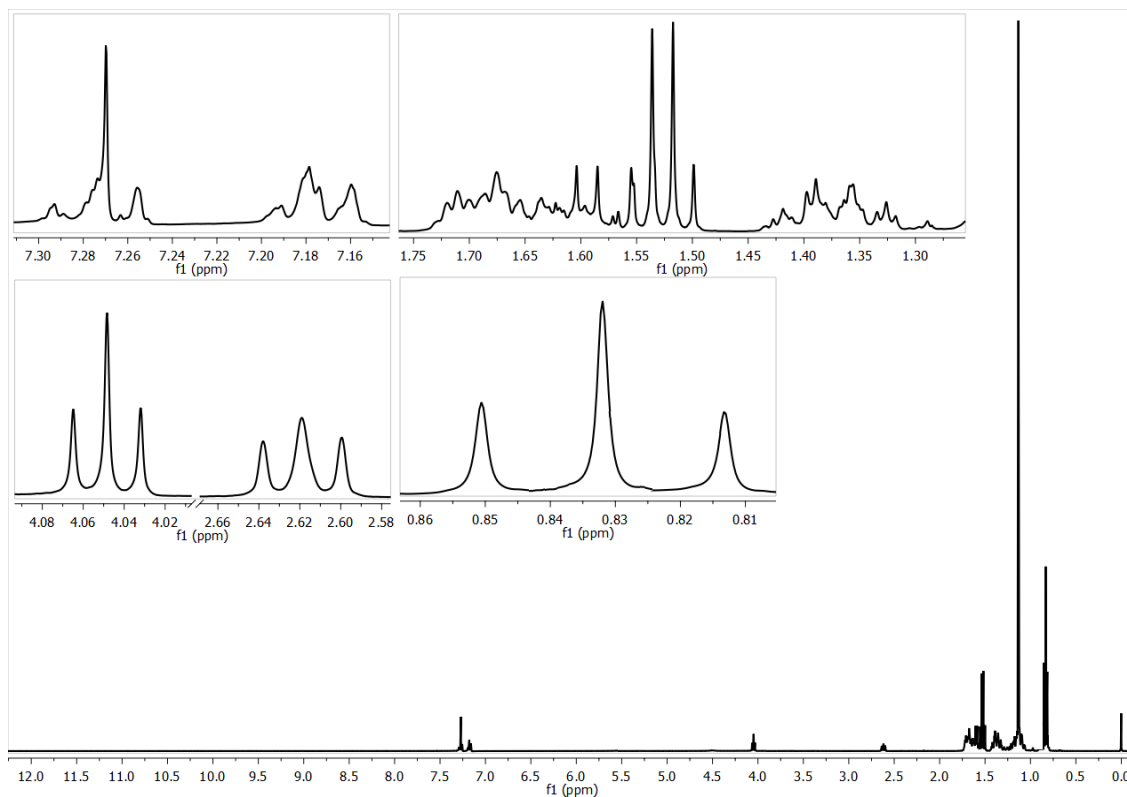

**Figure S125.**  $^1\text{H}$  NMR spectrum of 5-phenylpentyl 2,2-dimethylbutanoate (**6b**) recorded in  $\text{CDCl}_3$

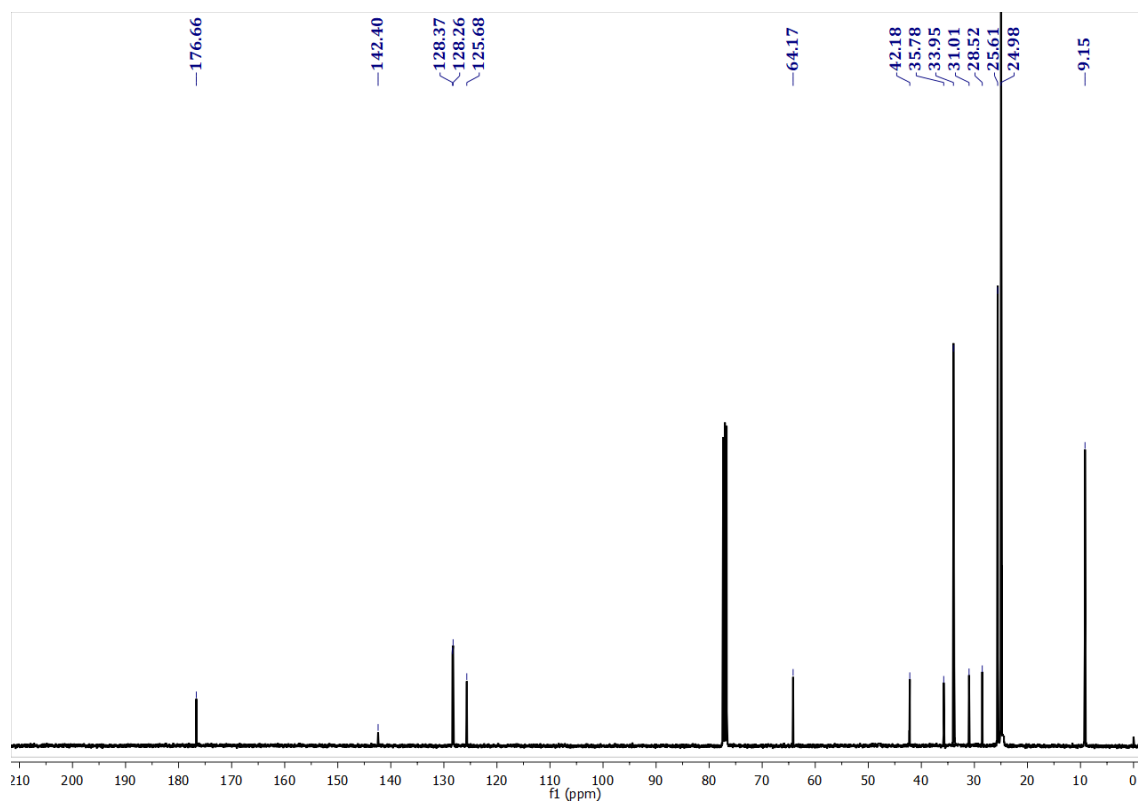

**Figure S126.** <sup>13</sup>C NMR spectrum of 5-phenylpentyl 2,2-dimethylbutanoate (**6b**) recorded in CDCl<sub>3</sub>

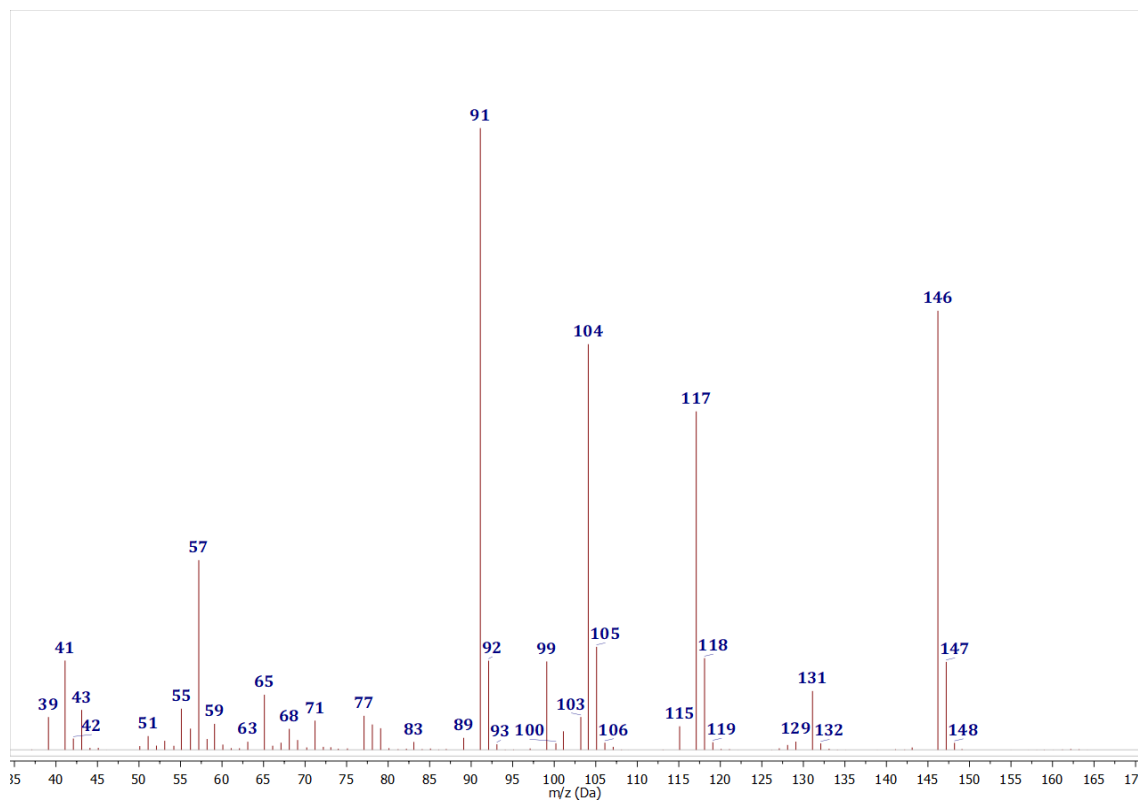

**Figure S127.** Mass spectrum of 5-phenylpentyl 3,3-dimethylbutanoate (**6c**)

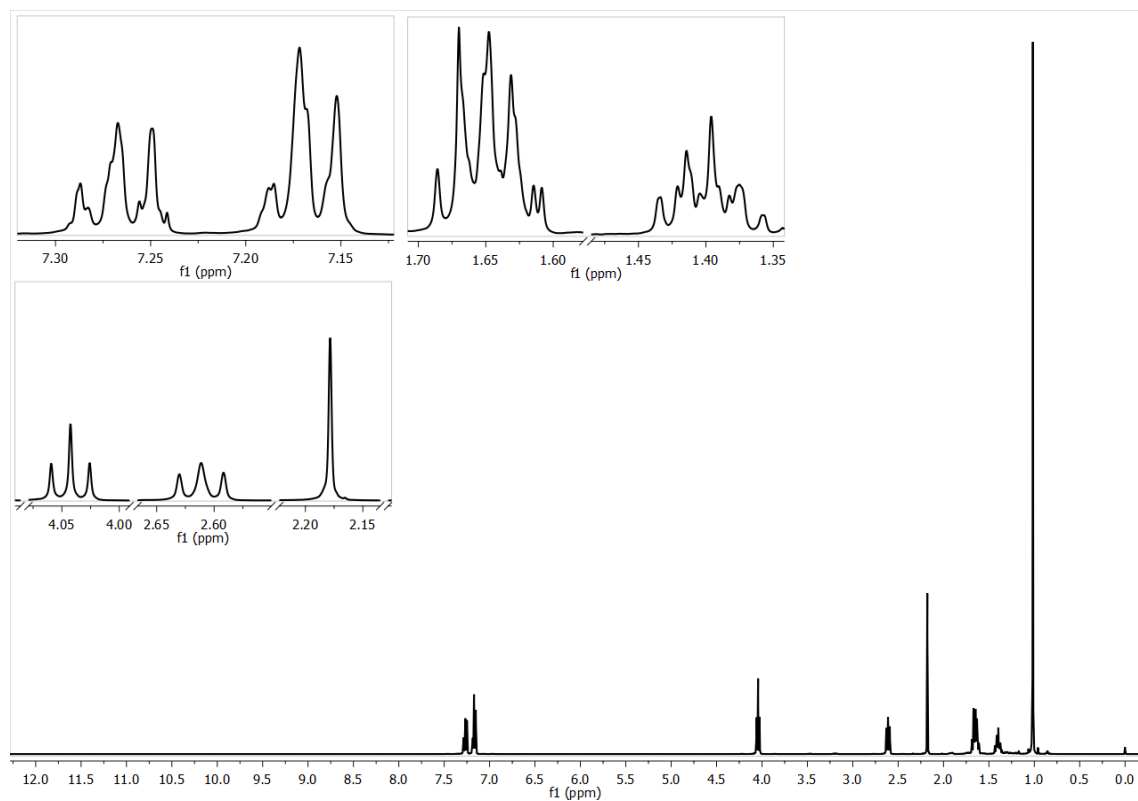

**Figure S128.** <sup>1</sup>H NMR spectrum of 5-phenylpentyl 3,3-dimethylbutanoate (**6c**) recorded in CDCl<sub>3</sub>

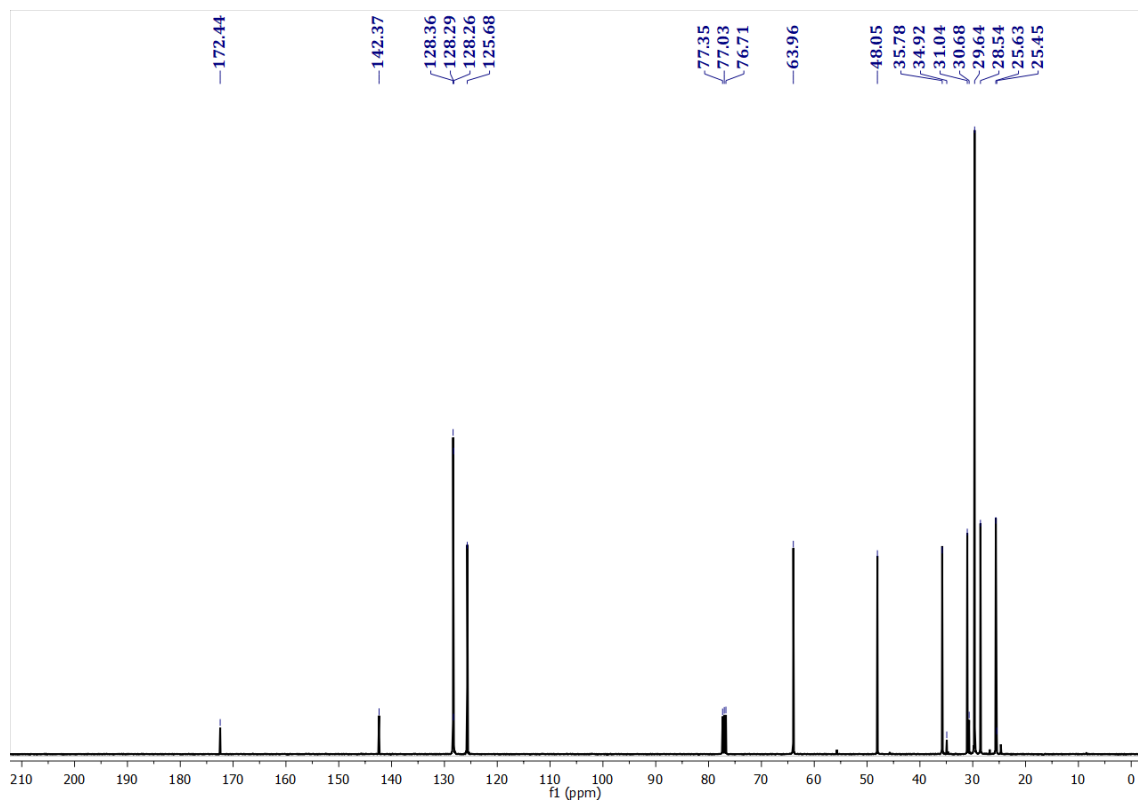

**Figure S129.** <sup>13</sup>C NMR spectrum of 5-phenylpentyl 3,3-dimethylbutanoate (**6c**) recorded in CDCl<sub>3</sub>

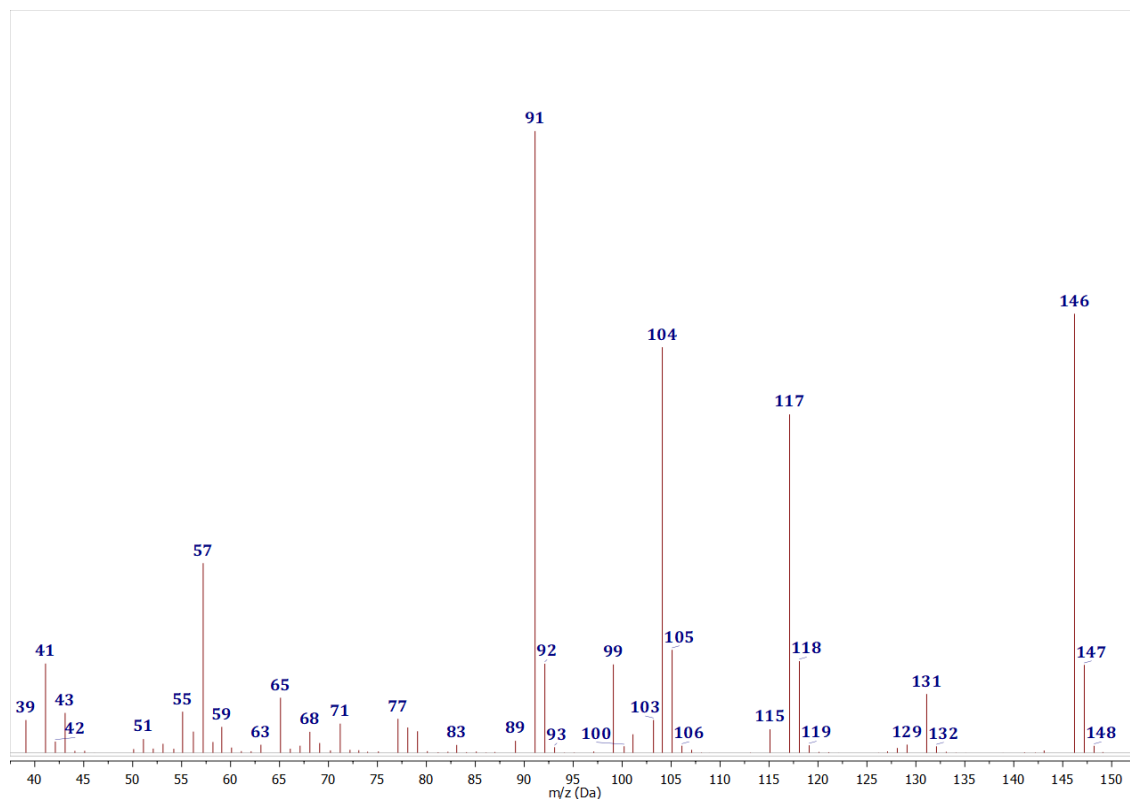

**Figure S130.** Mass spectrum of 5-phenylpentyl 2,3-dimethylbutanoate (**6d**)

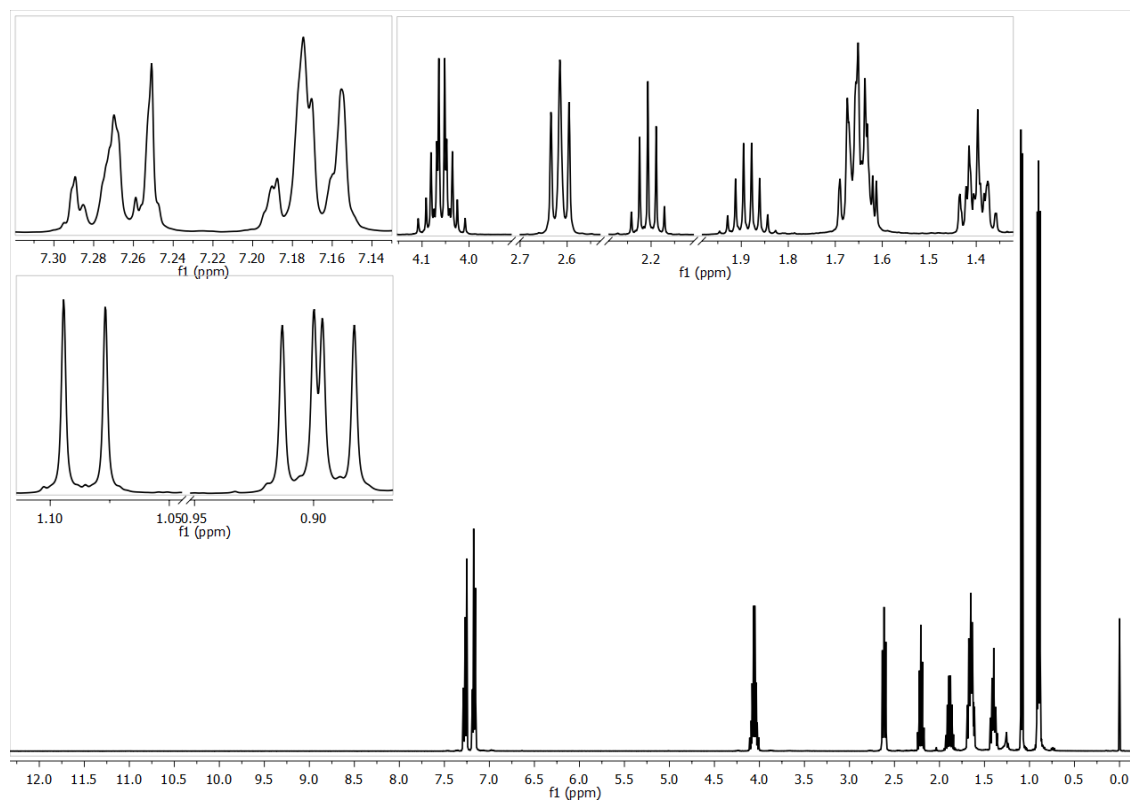

**Figure S131.**  $^1\text{H}$  NMR spectrum of 5-phenylpentyl 2,3-dimethylbutanoate (**6d**) recorded in  $\text{CDCl}_3$

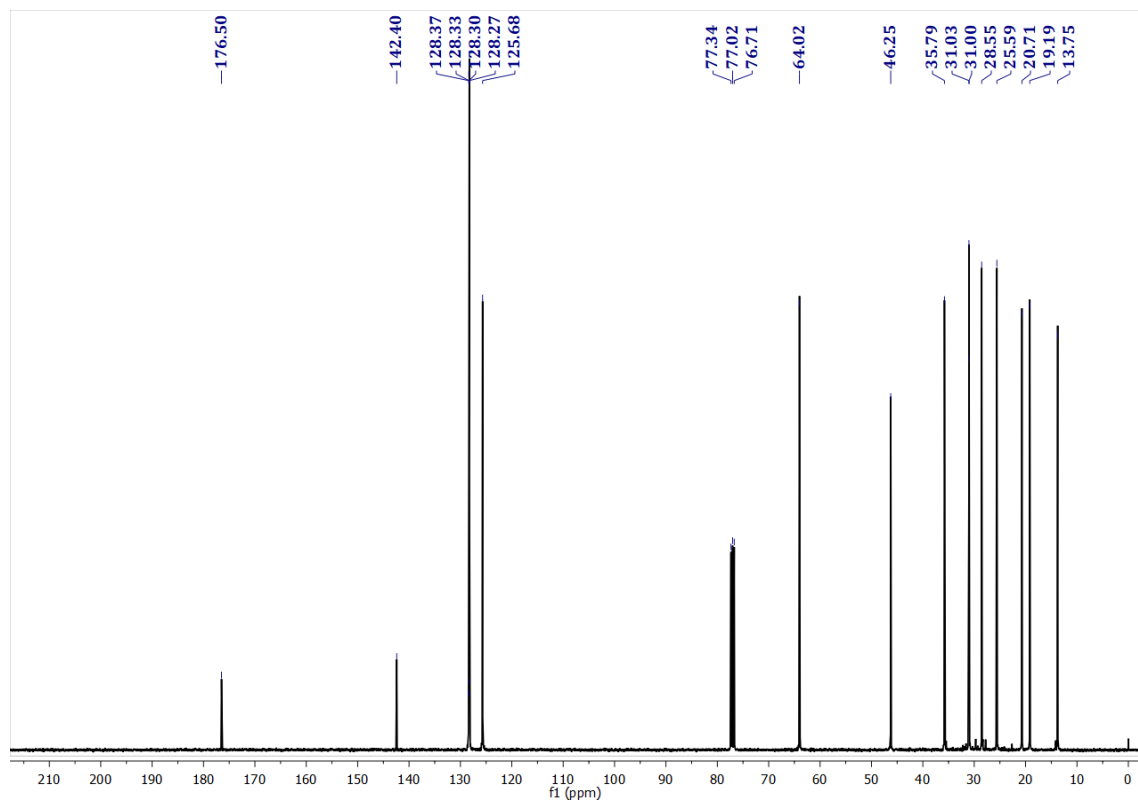

**Figure S132.** <sup>13</sup>C NMR spectrum of 5-phenylpentyl 2,3-dimethylbutanoate (**6d**) recorded in CDCl<sub>3</sub>

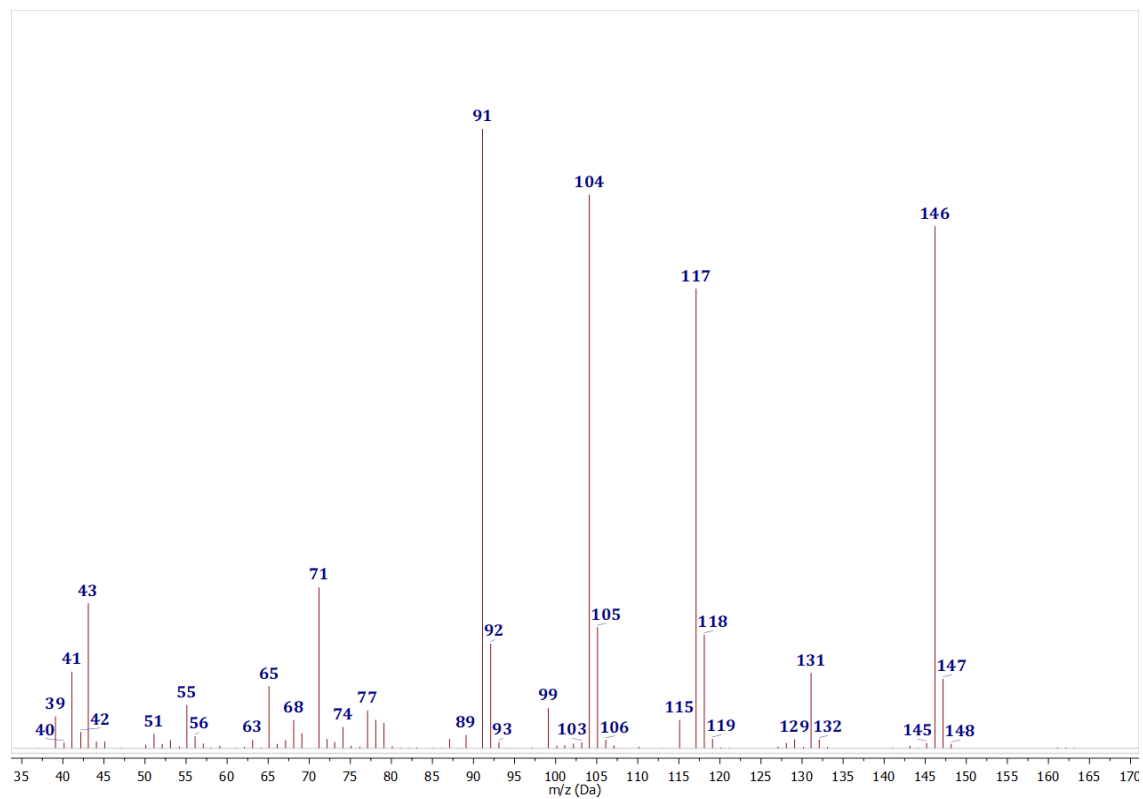

**Figure S133.** Mass spectrum of 5-phenylpentyl 2-methylpentanoate (**6e**)

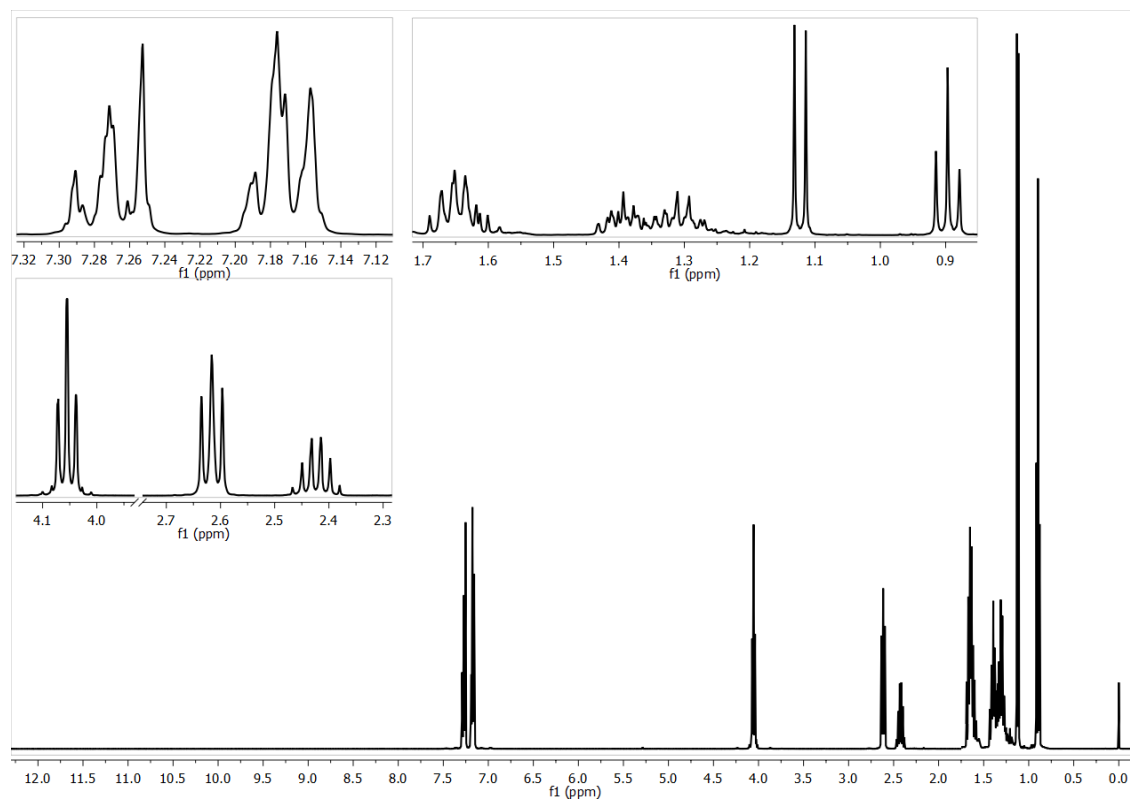

**Figure S134.**  $^1\text{H}$  NMR spectrum of 5-phenylpentyl 2-methylpentanoate (**6e**) recorded in  $\text{CDCl}_3$

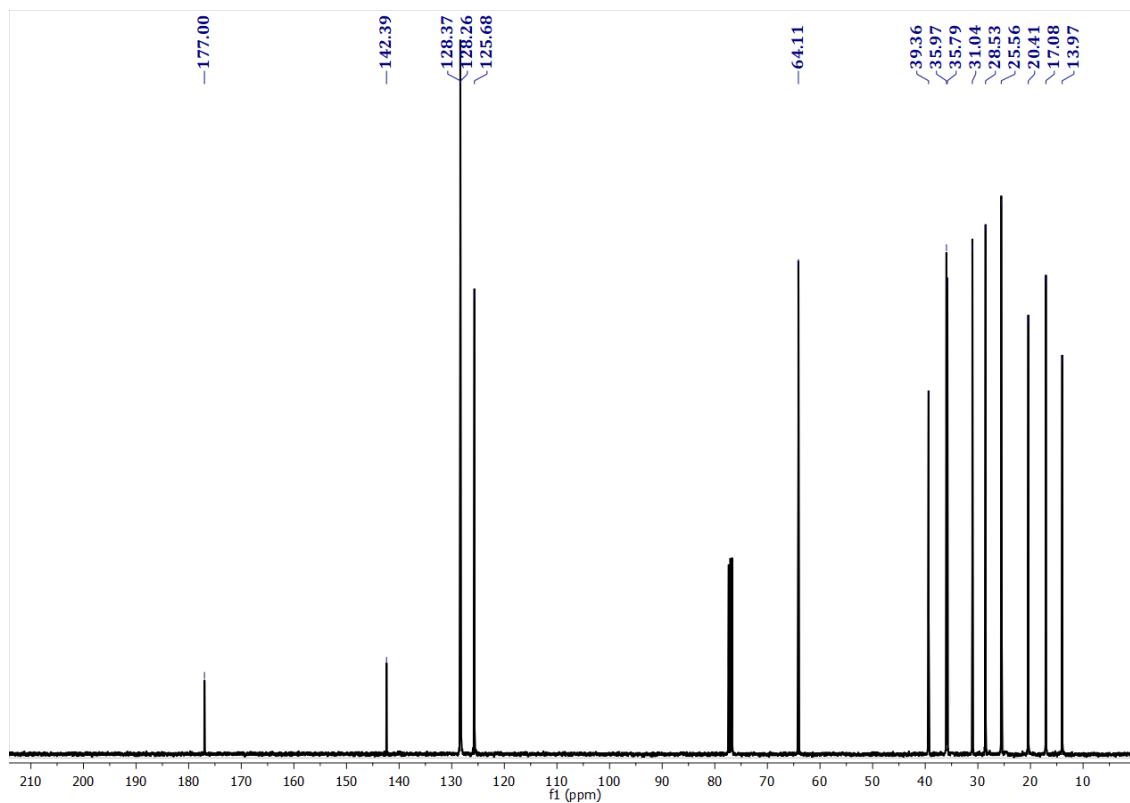

**Figure S135.**  $^{13}\text{C}$  NMR spectrum of 5-phenylpentyl 2-methylpentanoate (**6e**) recorded in  $\text{CDCl}_3$

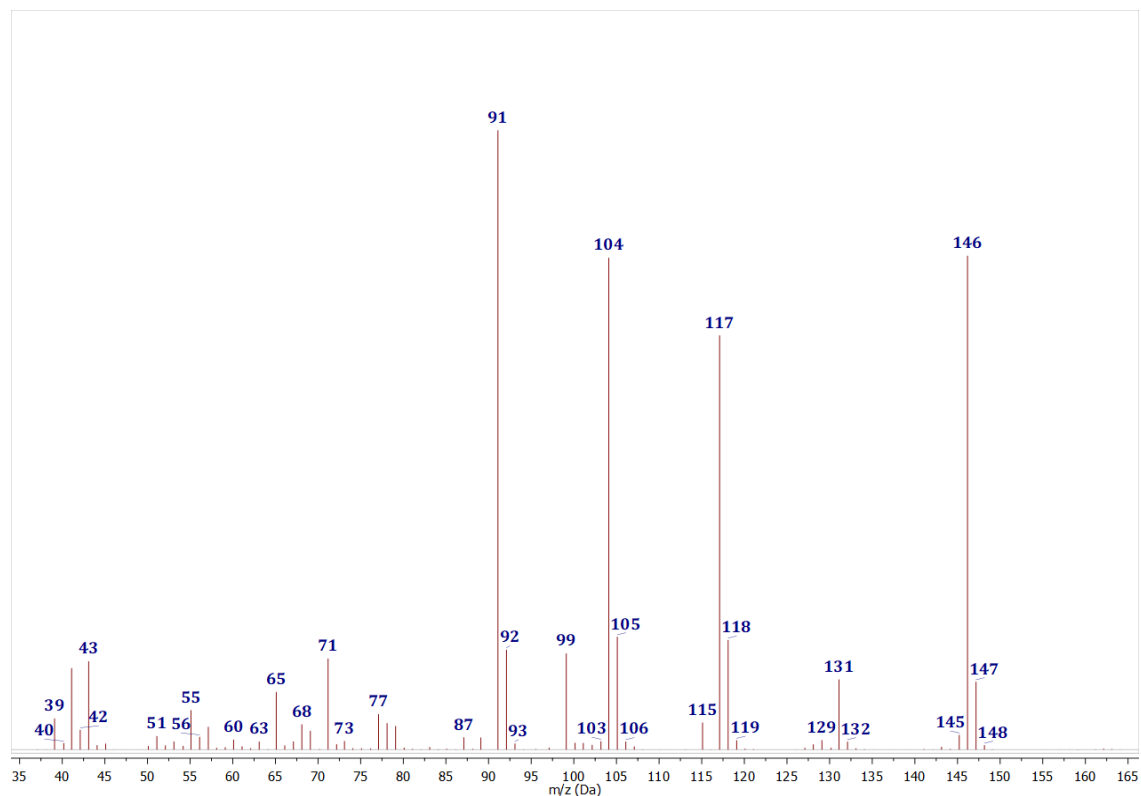

**Figure S136.** Mass spectrum of 5-phenylpentyl 3-methylpentanoate (**6f**)

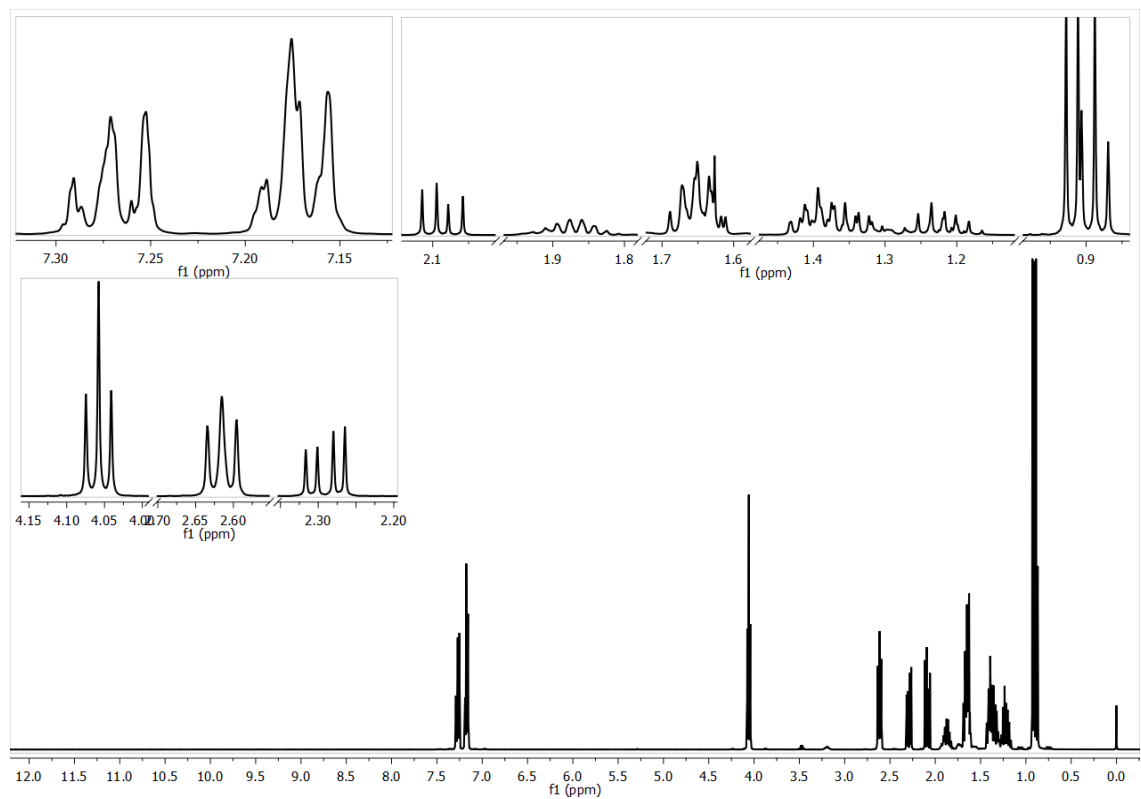

**Figure S137.**  $^1\text{H}$  NMR spectrum of 5-phenylpentyl 3-methylpentanoate (**6f**) recorded in  $\text{CDCl}_3$

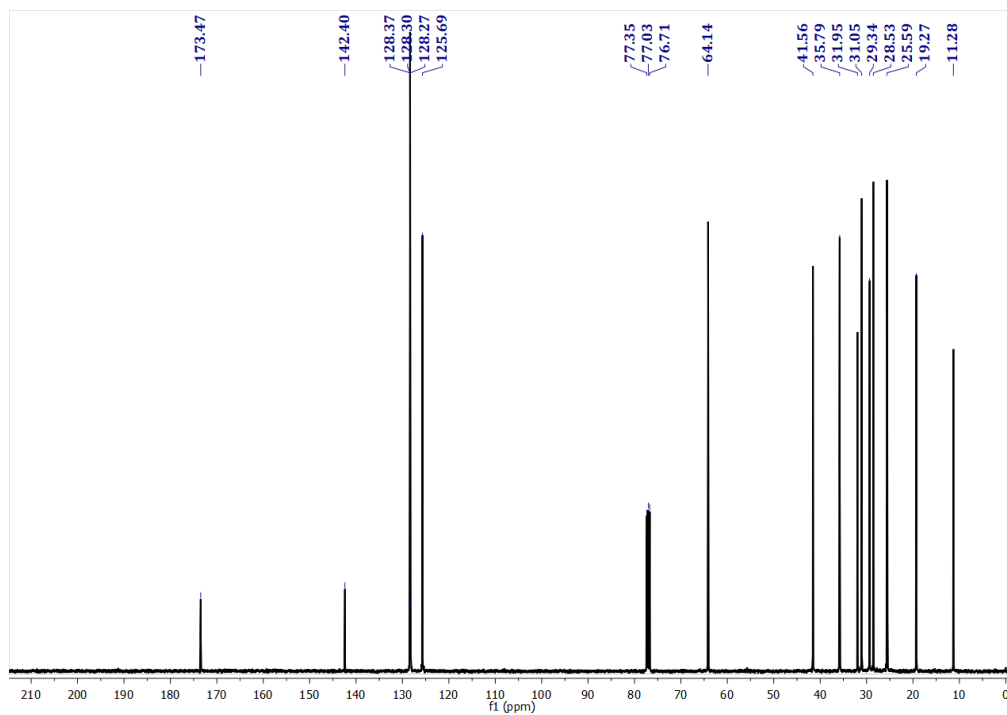

**Figure S138.** <sup>13</sup>C NMR spectrum of 5-phenylpentyl 3-methylpentanoate (**6f**) recorded in CDCl<sub>3</sub>

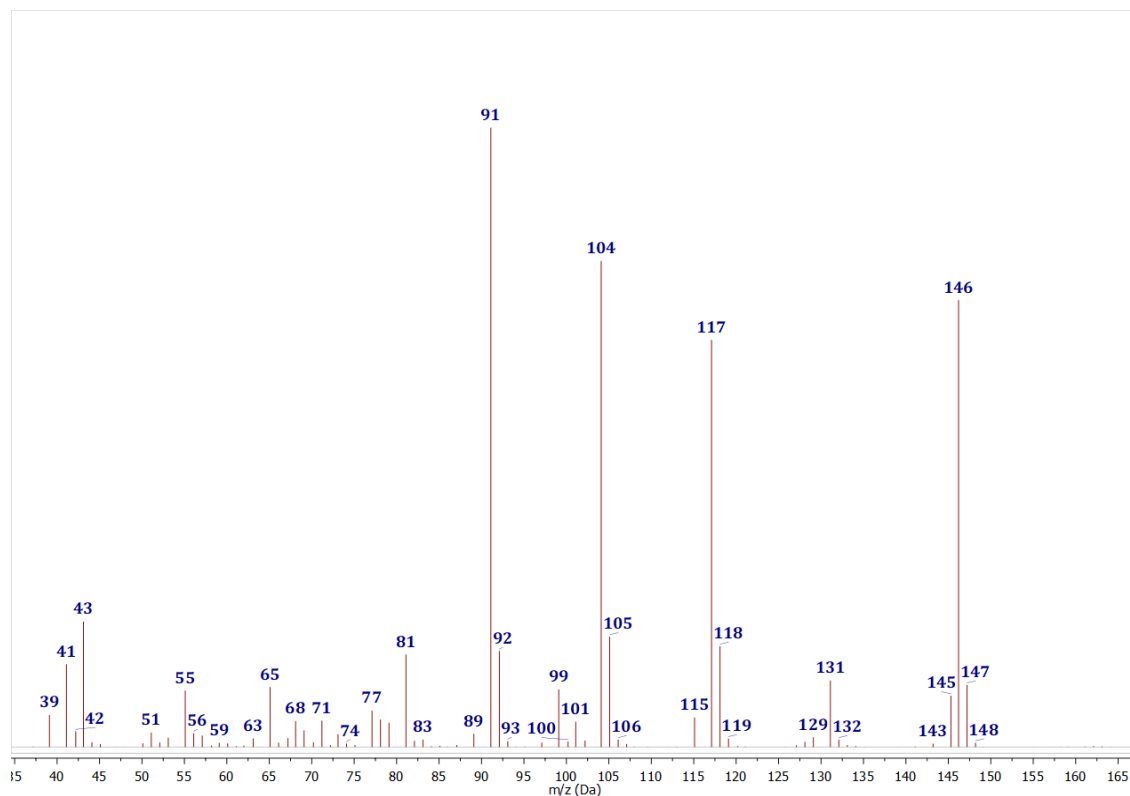

**Figure S139.** Mass spectrum of 5-phenylpentyl 4-methylpentanoate (**6g**)



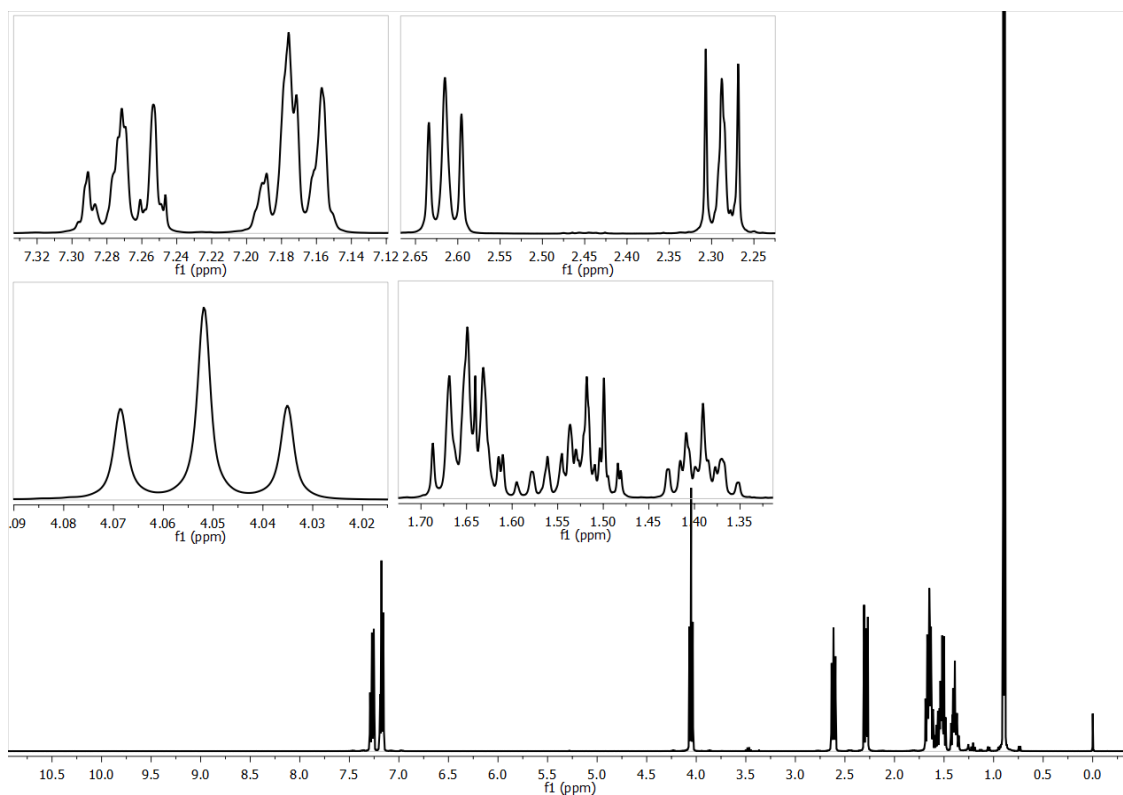

**Figure S140.**  $^1\text{H}$  NMR spectrum of 5-phenylpentyl 4-methylpentanoate (**6g**) recorded in  $\text{CDCl}_3$

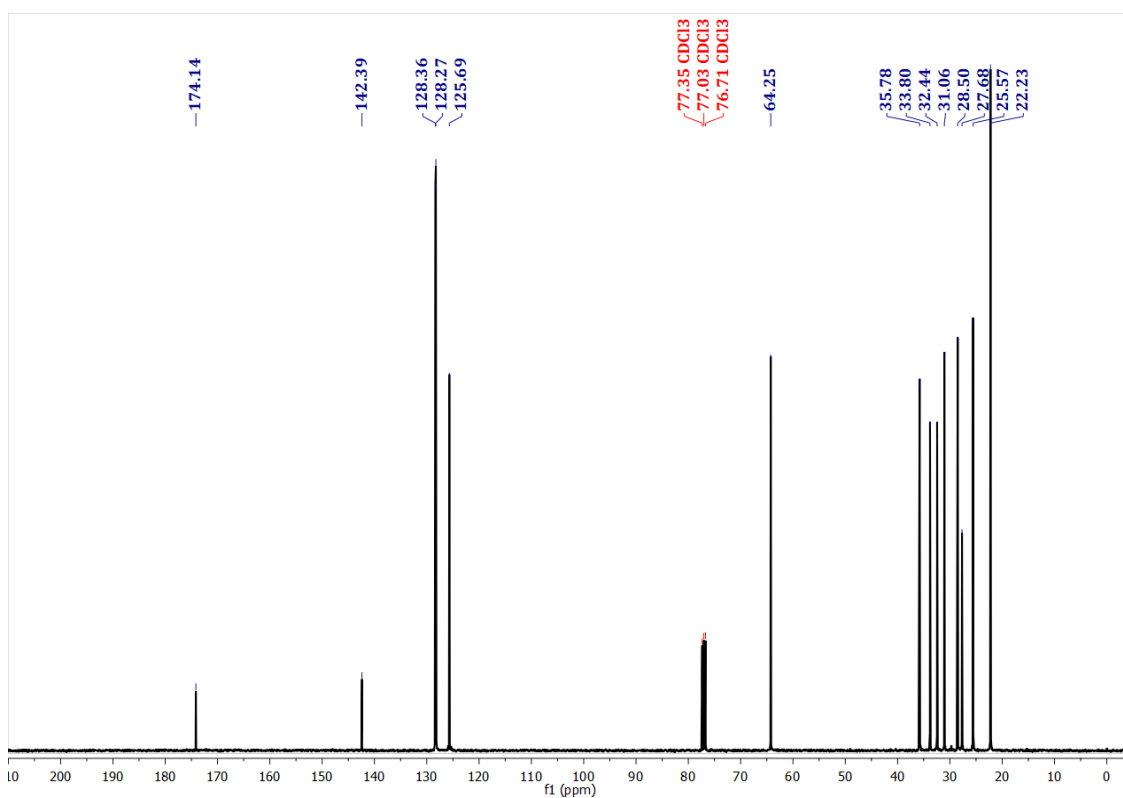

**Figure S141.**  $^{13}\text{C}$  NMR spectrum of 5-phenylpentyl 4-methylpentanoate (**6g**) recorded in  $\text{CDCl}_3$

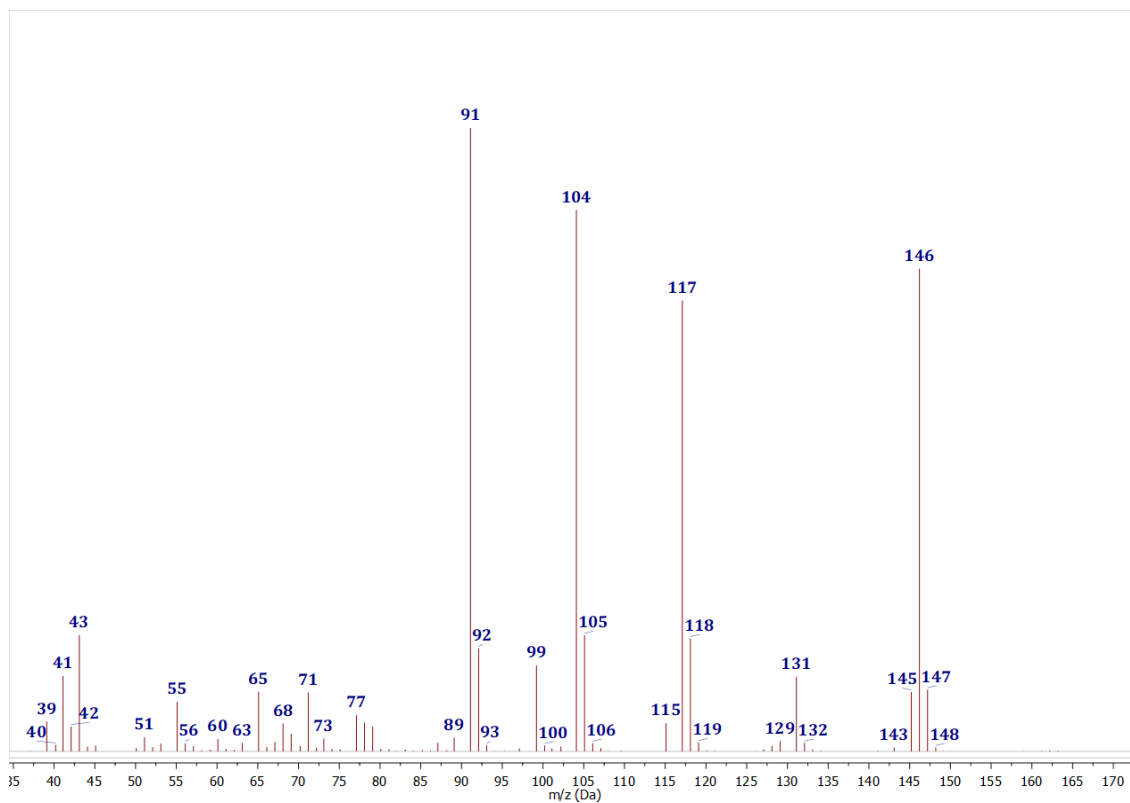

**Figure S142.** Mass spectrum of 5-phenylpentyl hexanoate (**6h**)

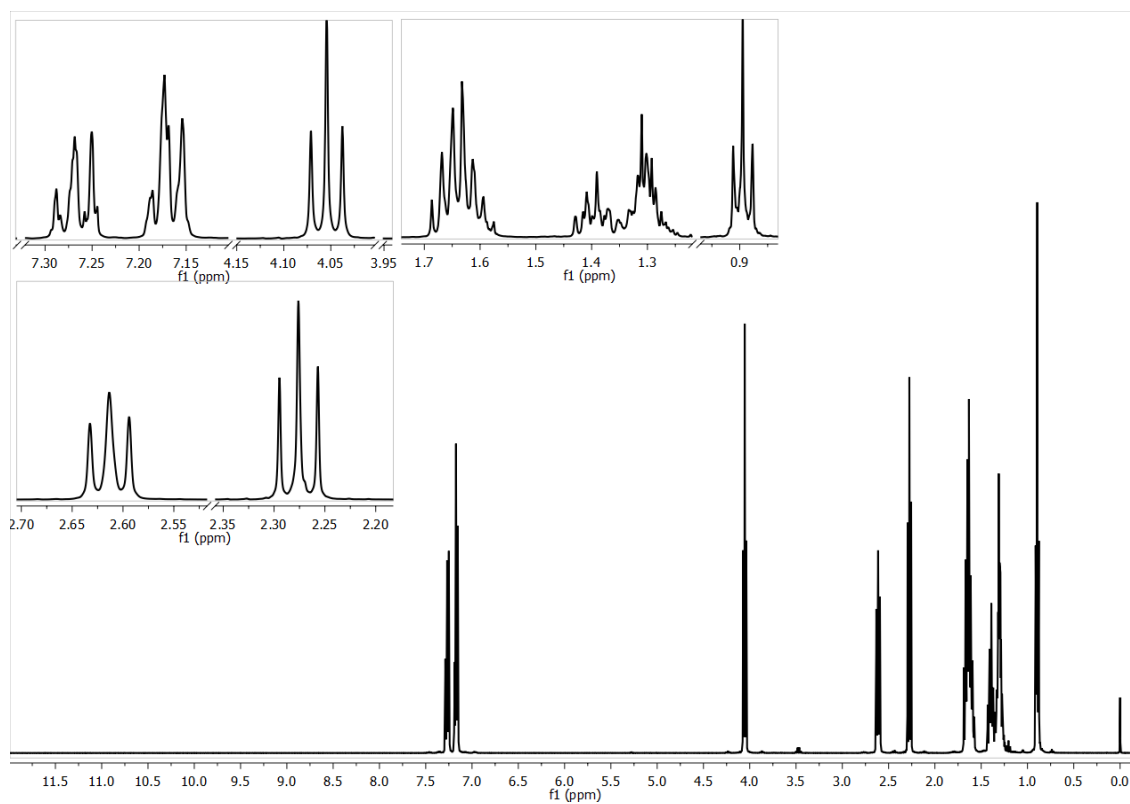

**Figure S143.**  $^1\text{H}$  NMR spectrum of 5-phenylpentyl hexanoate (**6h**) recorded in  $\text{CDCl}_3$

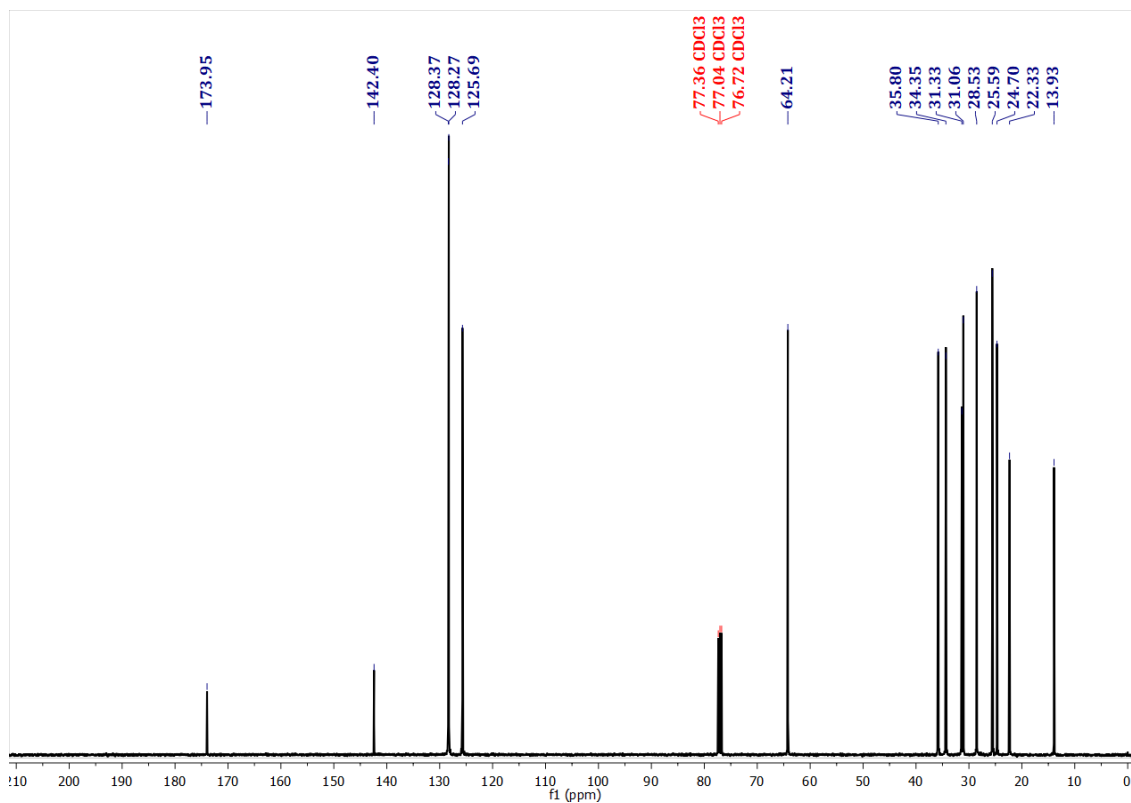

**Figure S144.** <sup>13</sup>C NMR spectrum of 5-phenylpentyl hexanoate (**6h**) recorded in CDCl<sub>3</sub>

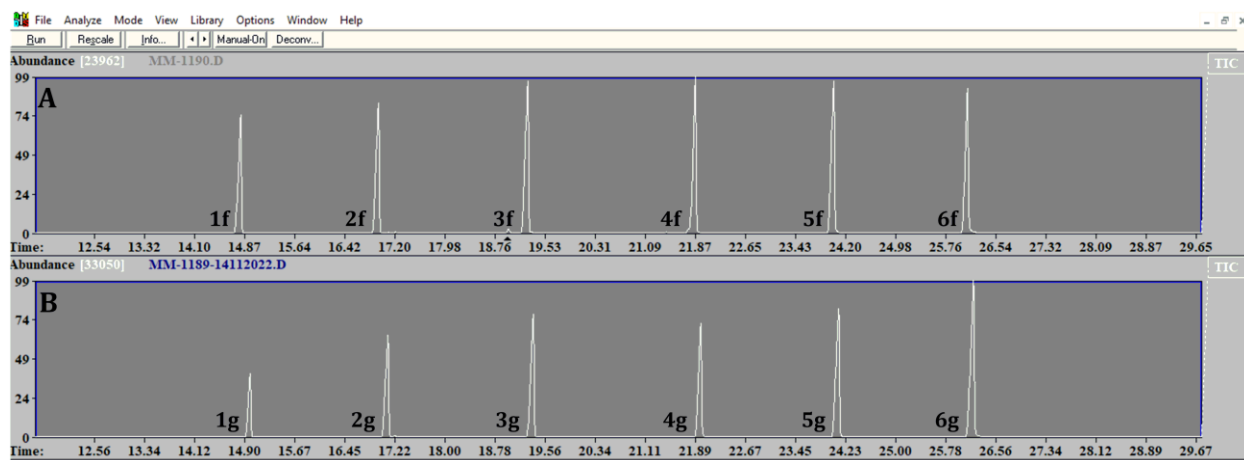

**Figure S145.** Typical total ion current (TIC) chromatogram of a mixture of synthesized (A) 3-methylpentanoates and (B) 4-methylpentanoates

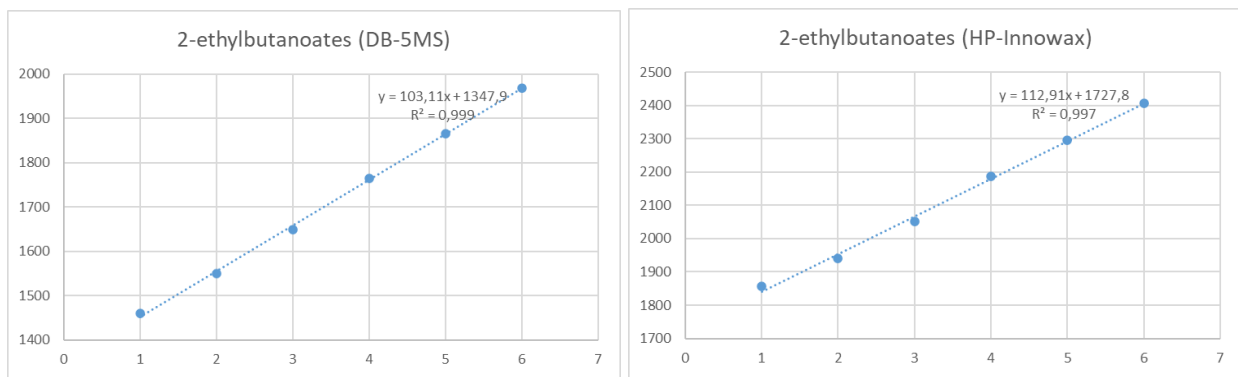

**Figure S146.** The dependence of RI values of the esters of the same acid (2-ethylbutanoic acid) and phenol (1), benzyl alcohol (2), phenethyl alcohol (3), 3-phenylpropanol (4), 4-phenylbutanol (5), and 5-phenylpentanol (6)

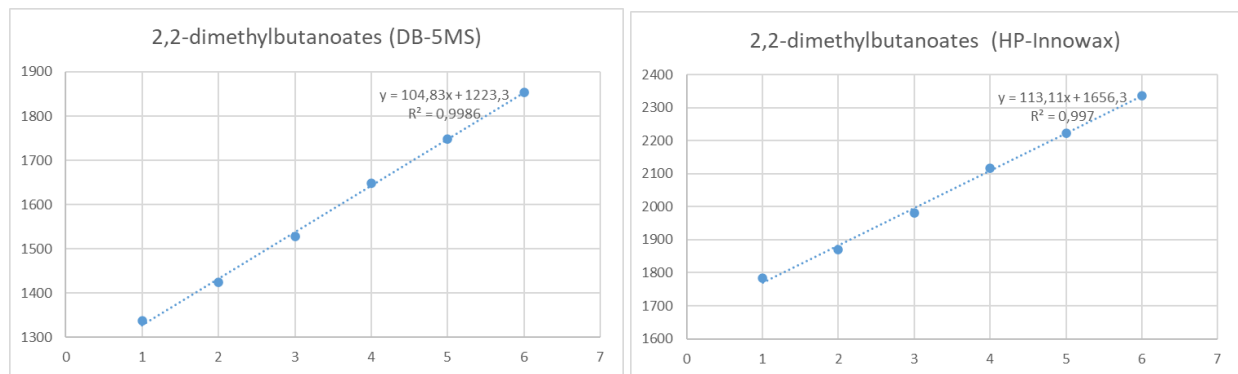

**Figure S147.** The dependence of RI values of the esters of the same acid (2,2-dimethylbutanoic acid) and phenol (1), benzyl alcohol (2), phenethyl alcohol (3), 3-phenylpropanol (4), 4-phenylbutanol (5), and 5-phenylpentanol (6)

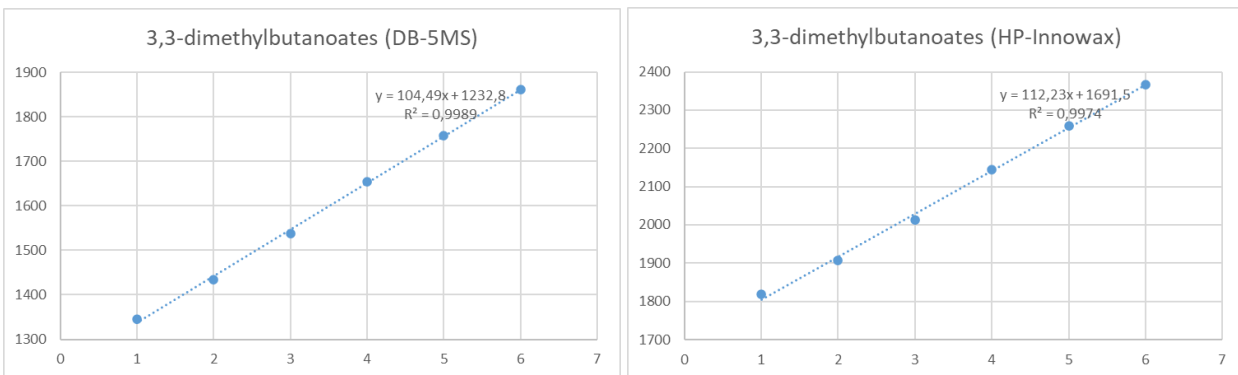

**Figure S148.** The dependence of RI values of the esters of the same acid (3,3-dimethylbutanoic acid) and phenol (1), benzyl alcohol (2), phenethyl alcohol (3), 3-phenylpropanol (4), 4-phenylbutanol (5), and 5-phenylpentanol (6)

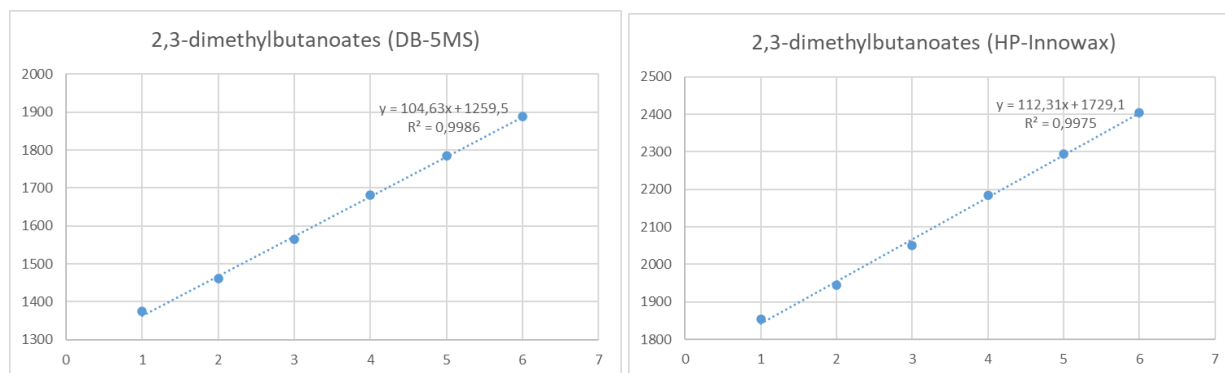

**Figure S149.** The dependence of RI values of the esters of the same acid (2,3-dimethylbutanoic acid) and phenol (1), benzyl alcohol (2), phenethyl alcohol (3), 3-phenylpropanol (4), 4-phenylbutanol (5), and 5-phenylpentanol (6)

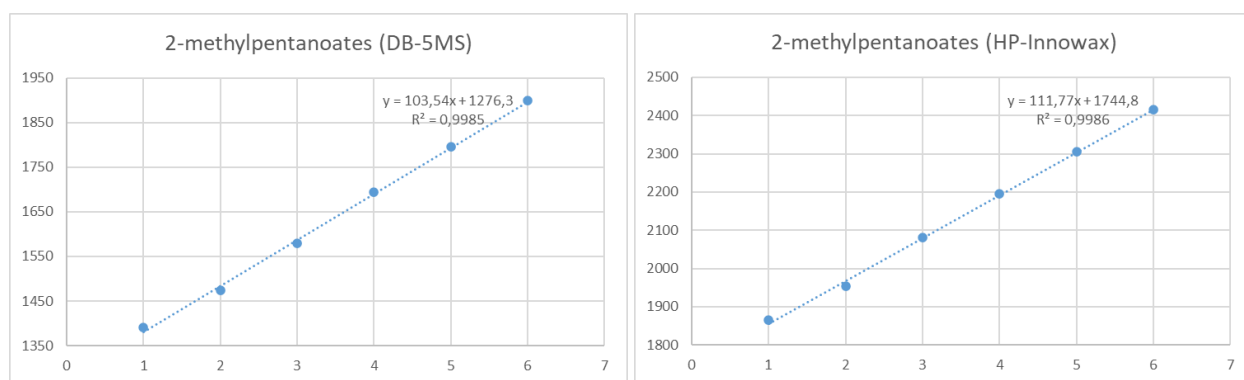

**Figure S150.** The dependence of RI values of the esters of the same acid (2-methylpentanoic acid) and phenol (1), benzyl alcohol (2), phenethyl alcohol (3), 3-phenylpropanol (4), 4-phenylbutanol (5), and 5-phenylpentanol (6)

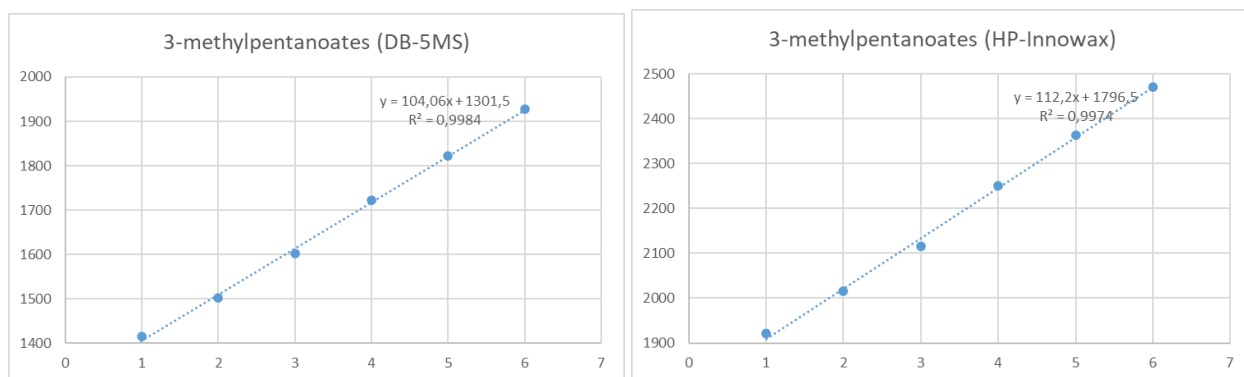

**Figure S151.** The dependence of RI values of the esters of the same acid (3-methylpentanoic acid) and phenol (1), benzyl alcohol (2), phenethyl alcohol (3), 3-phenylpropanol (4), 4-phenylbutanol (5), and 5-phenylpentanol (6)

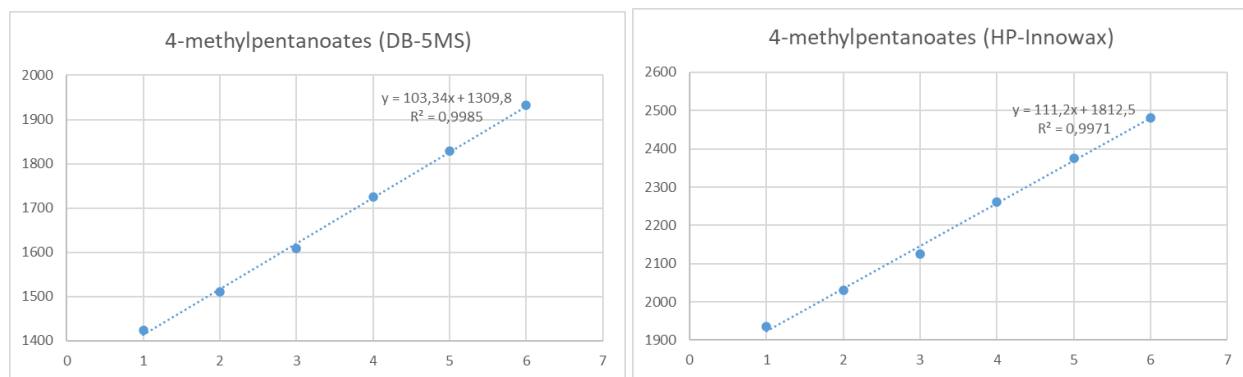

**Figure S152.** The dependence of RI values of the esters of the same acid (4-methylpentanoic acid) and phenol (1), benzyl alcohol (2), phenethyl alcohol (3), 3-phenylpropanol (4), 4-phenylbutanol (5), and 5-phenylpentanol (6)

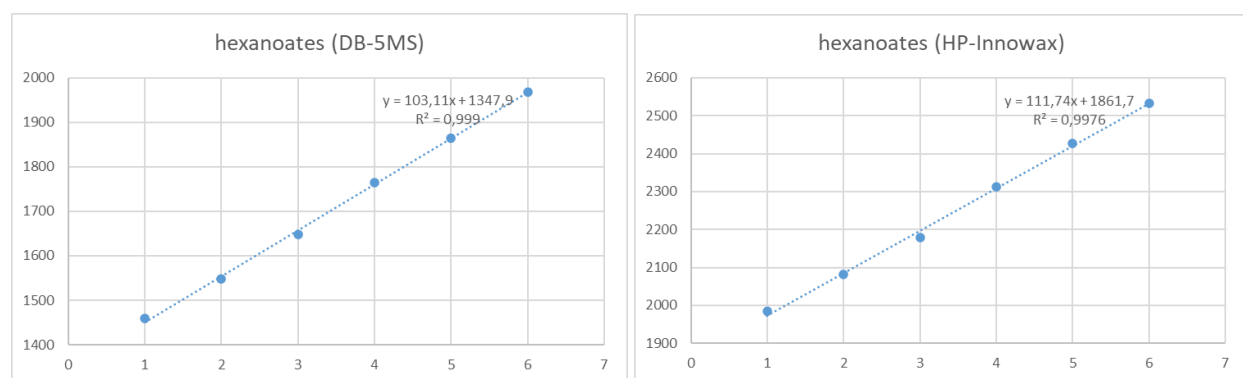

**Figure S153.** The dependence of RI values of the esters of the same acid (hexanoic acid) and phenol (1), benzyl alcohol (2), phenethyl alcohol (3), 3-phenylpropanol (4), 4-phenylbutanol (5), and 5-phenylpentanol (6)
